# Supplementary material for: Beneficial effects of a new neuroprotective compound in neuronal cells and MPTP-administered mouse model of Parkinson's disease
Source: Royal Society of Chemistry journal article supplement (doi:10.1039/d3cc03069e), 2023-01-01

Supplementary material for

**Beneficial effects of a new neuroprotective compound in neuronal cells and MPTP-administered mouse model of Parkinson's disease**

**Izumi Kato,<sup>\*a,b</sup> Yudai Ogawa,<sup>a</sup> Fumika Yakushiji,<sup>a,c</sup> Jiro Ogura,<sup>d</sup> Masaki Kobayashi,<sup>b</sup> Naoya Shindo,<sup>a,e</sup> Satoshi Ichikawa,<sup>a,c</sup> Katsumi Maenaka <sup>\*a,c,e,f,g,h</sup> and Masahiro Sakaitani <sup>\*a</sup>**

<sup>a</sup> Center for Research and Education on Drug Discovery, Faculty of Pharmaceutical Sciences, Hokkaido University, Sapporo 060-0812, Japan.

<sup>b</sup> Education Research Center for Clinical Pharmacy, Faculty of Pharmaceutical Sciences, Hokkaido University, Sapporo 060-0812, Japan.

<sup>c</sup> Global Station for Biosurfaces and Drug Discovery, Hokkaido University, Sapporo 060-0812, Japan.

<sup>d</sup> Department of Pharmacy, Yamagata University Hospital, 2-2-2 Iida-Nishi, Yamagata-shi, Yamagata 990-9585, Japan

<sup>e</sup> Graduate School of Pharmaceutical Sciences, Kyushu University, 3-1-1 Maidashi, Higashi-ku, Fukuoka 812-8582, Japan.

<sup>f</sup> Laboratory of Biomolecular Science, Faculty of Pharmaceutical Sciences, Hokkaido University, Sapporo 060-0812, Japan.

<sup>g</sup> Division of Pathogen Structure, International Institute for Zoonosis Control, Hokkaido University, Sapporo 060-0812, Japan.

<sup>h</sup> Hokkaido University Institute for Vaccine Research & Development, Hokkaido University, Sapporo 060-0812, Japan.

\* Correspondence: [izumi\\_k@pharm.hokudai.ac.jp](mailto:izumi_k@pharm.hokudai.ac.jp) (I. K.)

[maenaka@pharm.hokudai.ac.jp](mailto:maenaka@pharm.hokudai.ac.jp) (K. M.)

[kinou.ob5@gmail.com](mailto:kinou.ob5@gmail.com) (M. S.)

## **Contents**

|                                                                                                            |    |
|------------------------------------------------------------------------------------------------------------|----|
| 1. <b>Additional file 1:</b> Figure S1 .....                                                               | 3  |
| 2. <b>Additional file 2:</b> Figure S2 .....                                                               | 4  |
| 3. <b>Additional file 3:</b> Figure S3 .....                                                               | 5  |
| 4. <b>Additional file 4:</b> Figure S4 .....                                                               | 6  |
| 5. <b>Additional file 5:</b> Figure S5 .....                                                               | 7  |
| 6. <b>Additional file 6:</b> Figure S6 .....                                                               | 8  |
| 7. <b>Additional file 7:</b> Figure S7 .....                                                               | 11 |
| 8. <b>Additional file 8:</b> Table S1 .....                                                                | 12 |
| 9. <b>Additional file 9:</b> Table S2.....                                                                 | 13 |
| 10. <b>Additional file 10:</b> Table S3.....                                                               | 14 |
| 11. <b>Additional file 11:</b> Schemes S1–S11 .....                                                        | 15 |
| 12. <b>General experimental methods</b> .....                                                              | 21 |
| 13. <b>Preparation of compounds</b> .....                                                                  | 25 |
| 14. <b><math>^1\text{H}</math> and <math>^{13}\text{C}</math> NMR charts of the target compounds</b> ..... | 49 |

**Additional file 1: Supplemental Fig. 1**

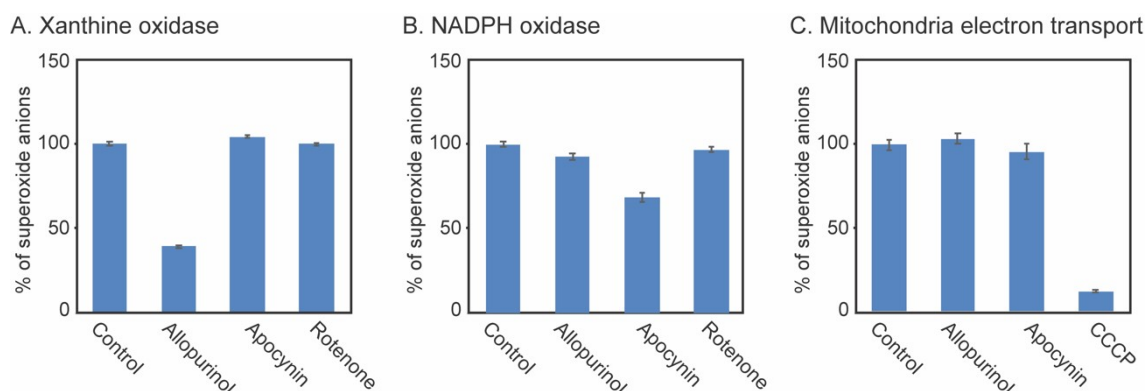

**Confirmation of the evaluation system using allopurinol, apocynin, and rotenone/carbonyl cyanide 3-chlorophenylhydrazone (CCCP).** The antioxidant effect was measured using the xanthine oxidase system (A), NADPH oxidase system (B), and mitochondria electron transport system (C), with an inhibitor concentration of 100  $\mu$ M. The amount of ROS generated in the DMSO-added control was taken as 100%. Commercially available recombinant xanthine oxidase (A), membrane fraction protein of rat heart (B) and isolated mitochondria from rat liver (C) were used for the experiments, respectively. Because NADPH oxidase is a main source of ROS in the heart, we used the membrane fraction protein of rat heart as a source of NADPH oxidase. Superoxide anions were detected by MPEC- (A), lucigenin- (B) and lucigenin- (C) amplified chemiluminescence, respectively.

## Additional file 2: Supplemental Fig. 2

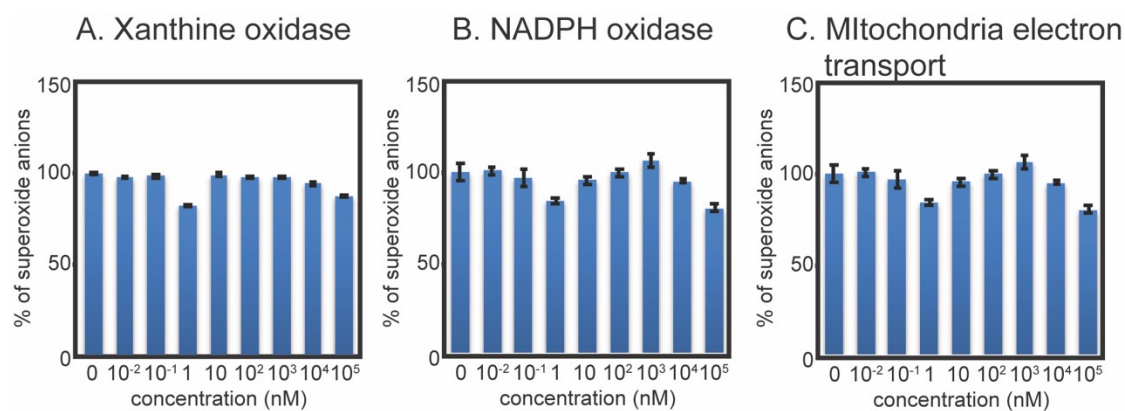

The antioxidant effect of compounds was measured by assessing their ability to scavenge superoxide anions. The antioxidant effect was measured, as shown in Fig. S1.

## Additional file 3: Supplemental Fig. 3

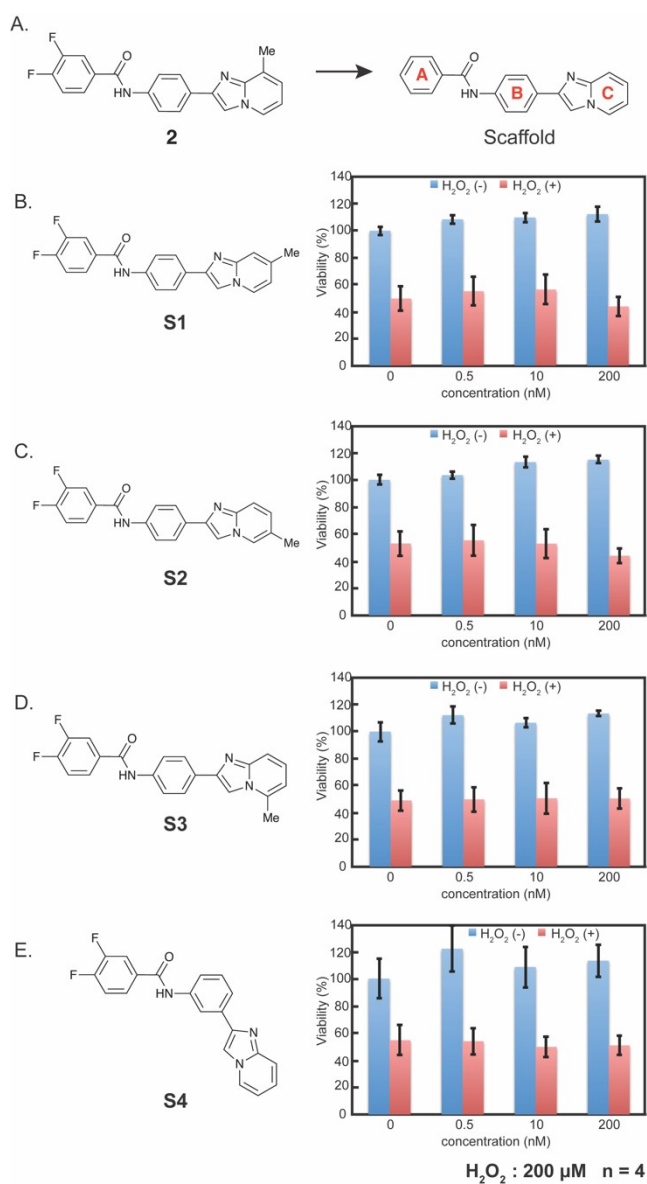



**Introduction of an alkyl group on the benzene ring decreases the cell-protective activity.** These compounds **S1–S4** lost their cell protective effects after the addition of  $\text{H}_2\text{O}_2$  (200  $\mu\text{M}$ ), with the methyl group repositioned on the benzene ring. (A) The scaffold of **2** contains the three aromatic rings defined as A, B, and C ring, respectively. (B–E) Cell viability was measured using the MTS assay, as shown in Fig. 1. The number of experiments ( $n$ ) was 4.

**Additional file 4: Supplemental Fig. 4**

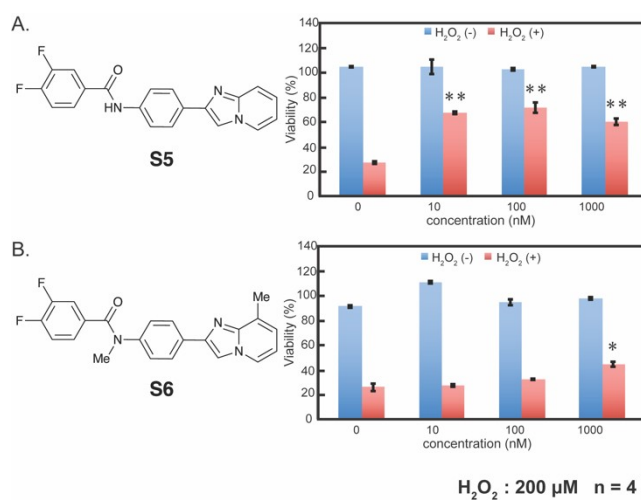

**Introduction of a methyl group to the amide moiety decreases the cell-protective activity.** The compounds lost their cell-protective effects after the addition of H<sub>2</sub>O<sub>2</sub> (200  $\mu$ M) due to the incorporation of a methyl group at the amide bond. (A-E) Cell viability was measured using the MTS assay, as shown in Fig. 1. Significance: \* $p < 0.01$ , \*\* $p < 0.001$  versus only H<sub>2</sub>O<sub>2</sub> (200  $\mu$ M) treated cells. The number of experiments ( $n$ ) was 4.

## Additional file 5: Supplemental Fig. 5

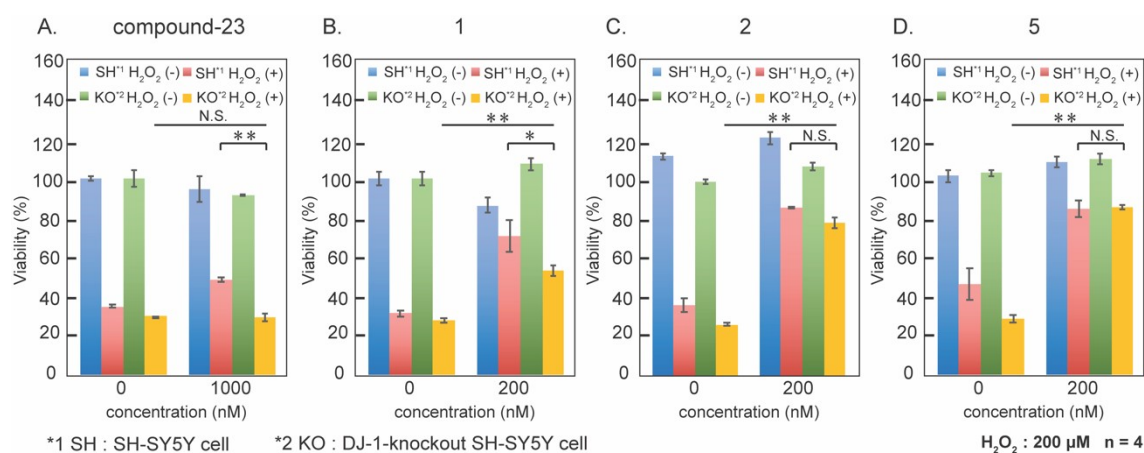

**Contribution of DJ-1 to cell protective activity.** DJ-1-knockout SH-SY5Y cells treated with compounds **2** and **5** demonstrate protective properties against H<sub>2</sub>O<sub>2</sub> (200 μM). (A-D) Cell viability was measured using the MTS assay, as shown in Fig. 1. The values shown in panels mean ± SE (*n* = 4). Significance: \**p* < 0.01, \*\**p* < 0.001 versus only H<sub>2</sub>O<sub>2</sub> (200 μM) treated cells. N.S. indicates no significance.

**Additional file 6: Supplemental Fig. 6-1**

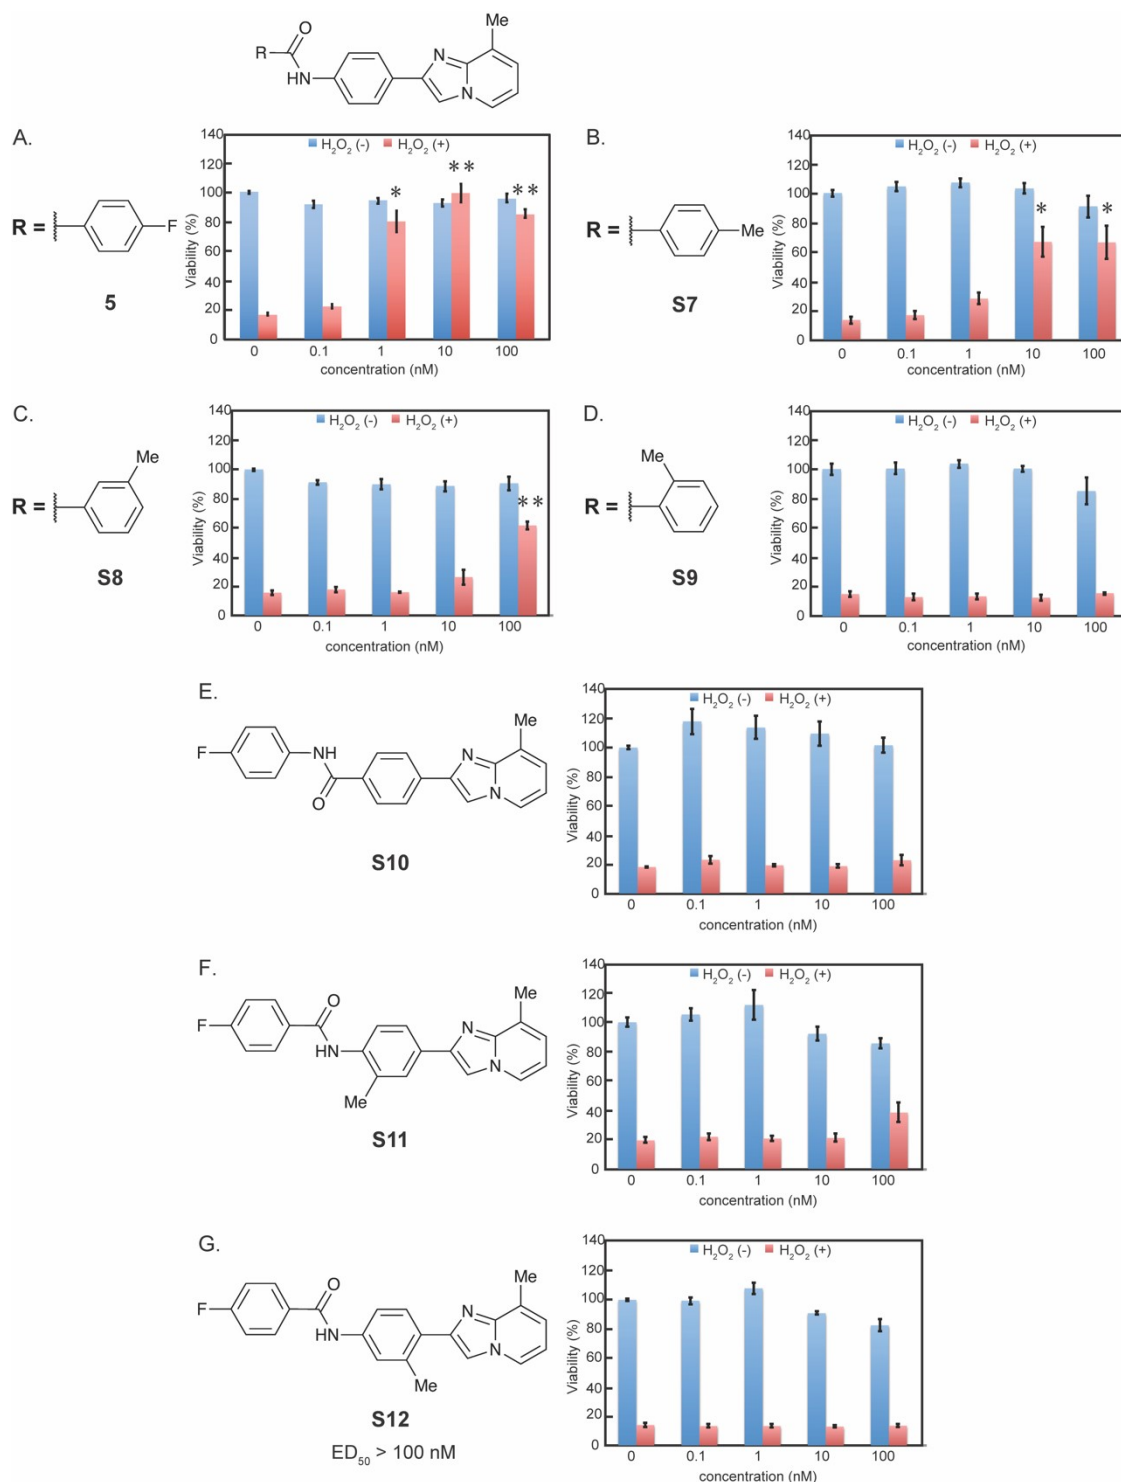

**Additional file 6: Supplemental Fig. 6-2**

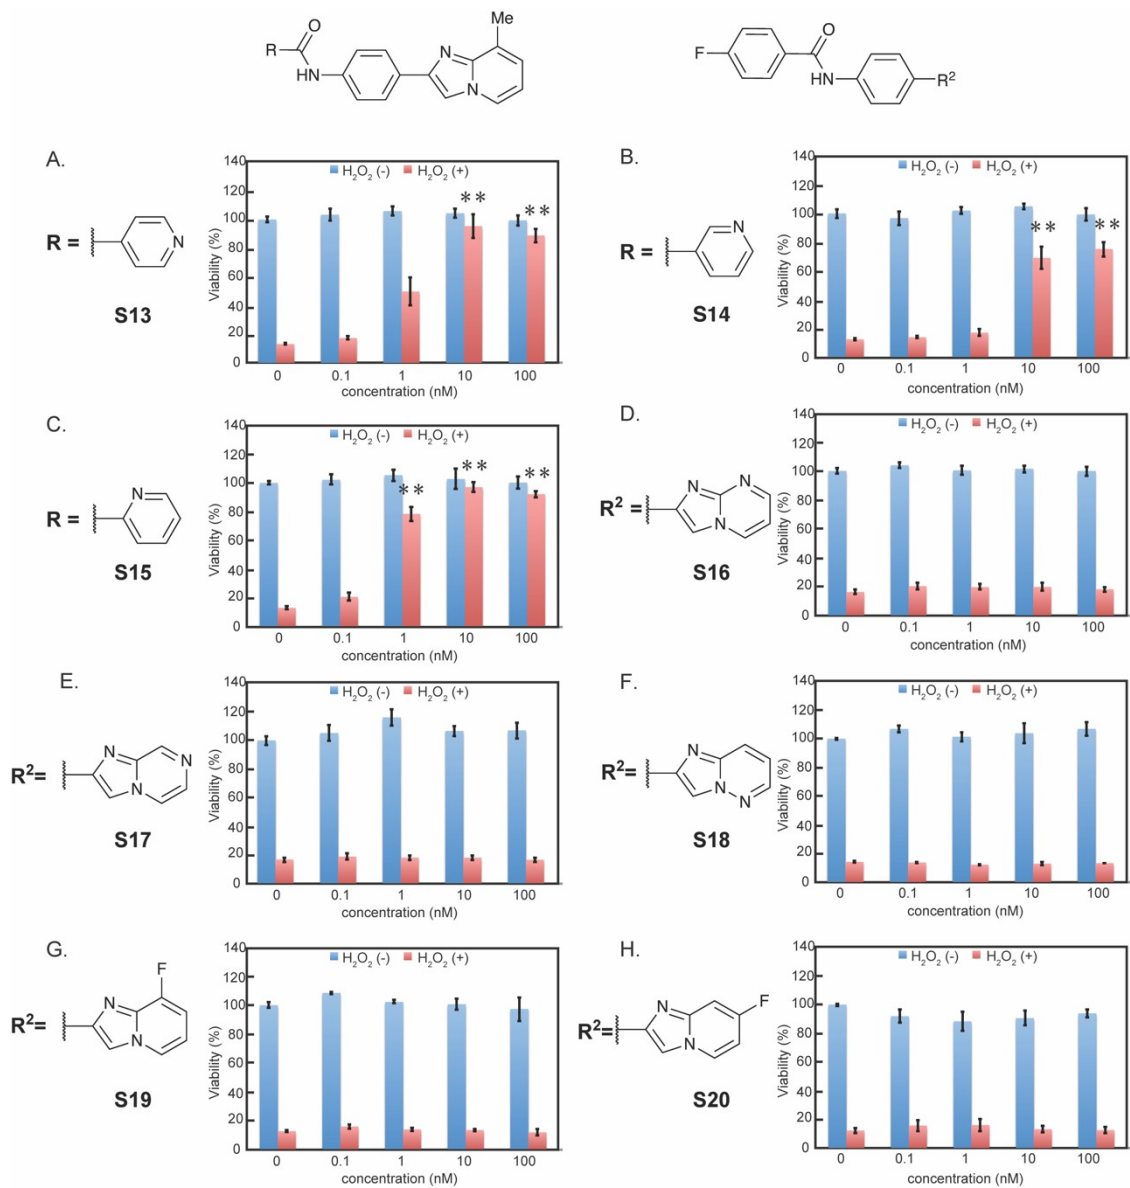

## Additional file 6: Supplemental Fig. 6-3

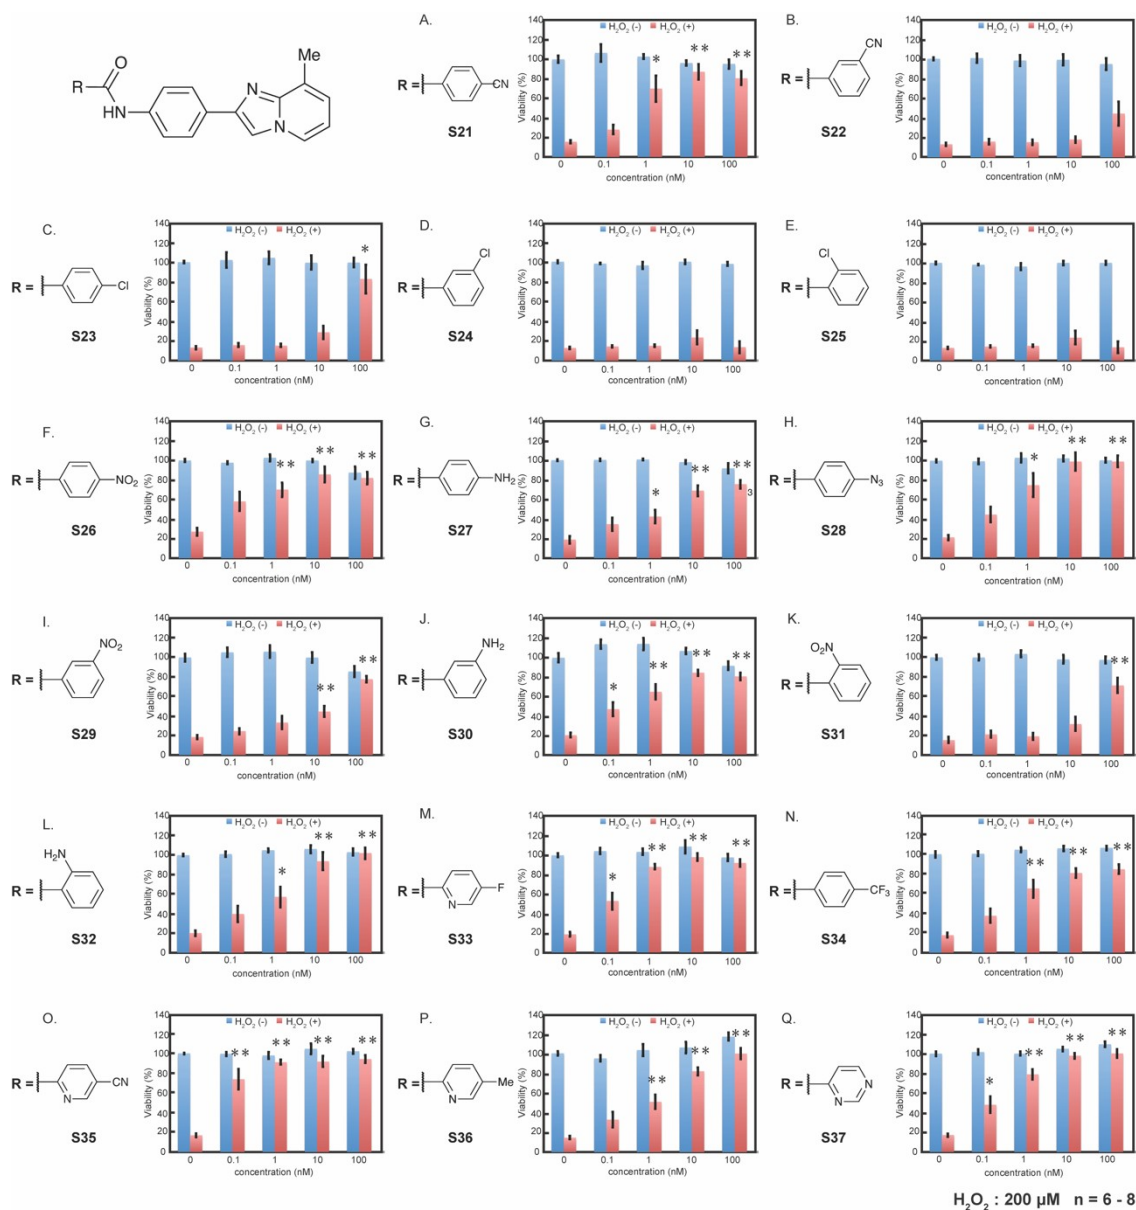

**New compounds developed based on compound 5.** We synthesized new compounds to investigate their structure–activity relationships, as shown in Supplemental Fig. 6-1. Methyl scanning of compound 5 was performed along with nitrogen and fluorine scanning, as described in Supplemental Fig. 6-2 and 6-3, respectively. Various aromatic groups were tested as the A ring. Whole-cell viability was measured using the MTS assay, as described in Fig. 1. Significance: \* $p < 0.01$ , \*\* $p < 0.001$  versus only  $H_2O_2$  (200  $\mu M$ ) treated cells. The number of experiments ( $n$ ) was 6–8.

## Additional file 7: Supplemental Fig. 7

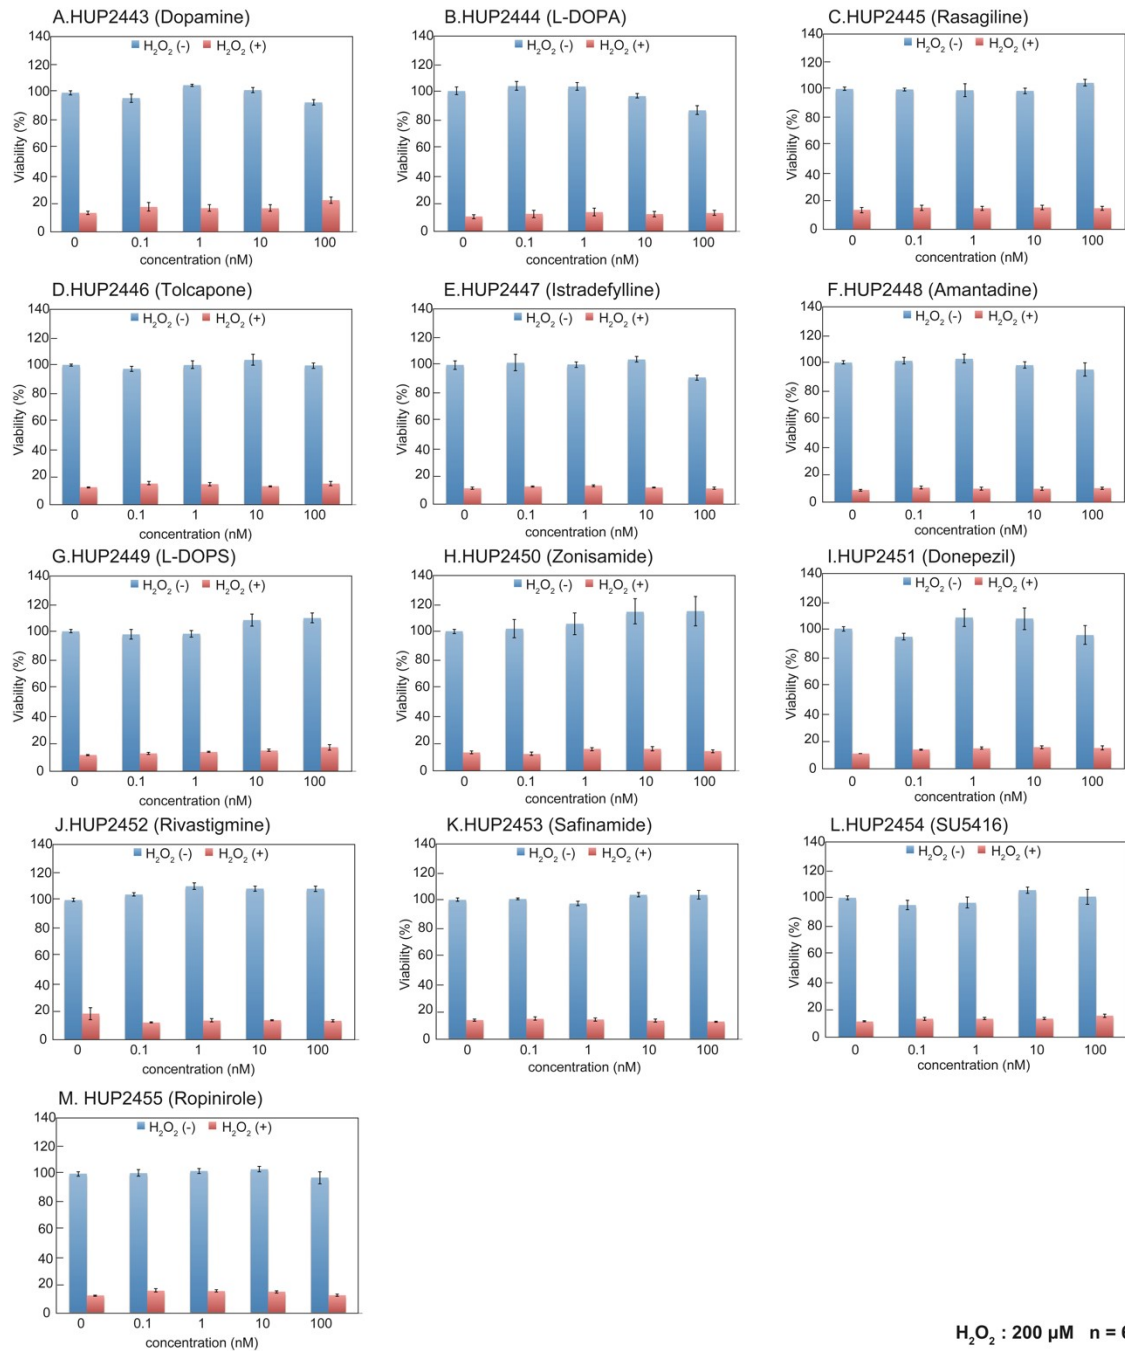

**The effects of twelve existing drugs for Parkinson's disease and a multikinase inhibitor SU5416.**  
(A–M) Cell viability was measured using the MTS assay, as described for Fig. 1. The number of experiments ( $n$ ) was 6.

**Additional file 8: Supplemental Table. 1**

**Table S1. The pharmacokinetic tests of 11 compounds**

| <b>Liver microsomal Stability</b> |                                               |                                               |
|-----------------------------------|-----------------------------------------------|-----------------------------------------------|
| <b>Compound #</b>                 | <b>human LM<sup>*1</sup><br/>remained (%)</b> | <b>mouse LM<sup>*1</sup><br/>remained (%)</b> |
| <b>4</b>                          | 86                                            | 64                                            |
| <b>5</b>                          | 81                                            | 44                                            |
| <b>2</b>                          | 74                                            | 52                                            |
| <b>6</b>                          | 84                                            | 57                                            |
| <b>7</b>                          | 89                                            | 74                                            |
| <b>8</b>                          | 73                                            | 74                                            |
| <b>S5</b>                         | 82                                            | 72                                            |
| <b>S6</b>                         | 98                                            | 5                                             |
| <b>S7</b>                         | 68                                            | 29                                            |
| <b>S13</b>                        | 97                                            | 65                                            |
| <b>S21</b>                        | 94                                            | 47                                            |
| <b>S33</b>                        | 90                                            | 20                                            |
| <b>S35</b>                        | 87                                            | 47                                            |
| Verapamil <sup>*2</sup>           | 26                                            | 22                                            |
| Diltiazem <sup>*2</sup>           | 77                                            | 14                                            |

\*1 LM : Liver microsomal      \*2 : Positive control



## Additional file 9: Supplemental Table. 2

**Table S2. The pharmacokinetic tests of 11 compounds**

| Compound # | precipitation<br>concentration<br>( $\mu\text{M}$ ) | CYP Inhibition                                                                       |                                                                                      |                                                                                      |                                                                                      |                                                                                      | MBI <sup>*1</sup> |
|------------|-----------------------------------------------------|--------------------------------------------------------------------------------------|--------------------------------------------------------------------------------------|--------------------------------------------------------------------------------------|--------------------------------------------------------------------------------------|--------------------------------------------------------------------------------------|-------------------|
|            |                                                     | CYP1A2<br>inhibition                                                                 | CYP2C9<br>inhibition                                                                 | CYP2C19<br>inhibition                                                                | CYP2D6<br>inhibition                                                                 | CYP3A4<br>inhibition                                                                 |                   |
|            |                                                     | IC <sub>50</sub> ( $\mu\text{M}$ )<br>Pre <sup>*2</sup> (-)<br>Pre <sup>*2</sup> (+) | IC <sub>50</sub> ( $\mu\text{M}$ )<br>Pre <sup>*2</sup> (-)<br>Pre <sup>*2</sup> (+) | IC <sub>50</sub> ( $\mu\text{M}$ )<br>Pre <sup>*2</sup> (-)<br>Pre <sup>*2</sup> (+) | IC <sub>50</sub> ( $\mu\text{M}$ )<br>Pre <sup>*2</sup> (-)<br>Pre <sup>*2</sup> (+) | IC <sub>50</sub> ( $\mu\text{M}$ )<br>Pre <sup>*2</sup> (-)<br>Pre <sup>*2</sup> (+) |                   |
| <b>4</b>   | >50                                                 | >50                                                                                  | 28                                                                                   | >50                                                                                  | >50                                                                                  | >50                                                                                  | +                 |
|            |                                                     | >50                                                                                  | 29                                                                                   | >50                                                                                  | >50                                                                                  | 18                                                                                   |                   |
| <b>5</b>   | >10                                                 | >10                                                                                  | >10                                                                                  | >10                                                                                  | >10                                                                                  | >10                                                                                  | -                 |
|            |                                                     | >10                                                                                  | >10                                                                                  | >10                                                                                  | >10                                                                                  | >10                                                                                  |                   |
| <b>2</b>   | >10                                                 | >10                                                                                  | >10                                                                                  | >10                                                                                  | >10                                                                                  | >10                                                                                  | -                 |
|            |                                                     | >10                                                                                  | >10                                                                                  | >10                                                                                  | >10                                                                                  | >10                                                                                  |                   |
| <b>6</b>   | >10                                                 | >10                                                                                  | >10                                                                                  | >10                                                                                  | >10                                                                                  | >10                                                                                  | -                 |
|            |                                                     | >10                                                                                  | >10                                                                                  | >10                                                                                  | >10                                                                                  | >10                                                                                  |                   |
| <b>7</b>   | >10                                                 | >10                                                                                  | >10                                                                                  | >10                                                                                  | >10                                                                                  | >10                                                                                  | -                 |
|            |                                                     | >10                                                                                  | >10                                                                                  | >10                                                                                  | >10                                                                                  | >10                                                                                  |                   |
| <b>8</b>   | >10                                                 | >10                                                                                  | >10                                                                                  | >10                                                                                  | >10                                                                                  | >10                                                                                  | -                 |
|            |                                                     | >10                                                                                  | >10                                                                                  | >10                                                                                  | >10                                                                                  | >10                                                                                  |                   |
| <b>S5</b>  | >50                                                 | >50                                                                                  | >50                                                                                  | >50                                                                                  | >50                                                                                  | >50                                                                                  | +                 |
|            |                                                     | 7.0                                                                                  | >50                                                                                  | >50                                                                                  | >50                                                                                  | >50                                                                                  |                   |
| <b>S6</b>  | >50                                                 | >50                                                                                  | 6.0                                                                                  | 6.7                                                                                  | >50                                                                                  | 40                                                                                   | ±                 |
|            |                                                     | 46                                                                                   | 6.9                                                                                  | 9.4                                                                                  | 33                                                                                   | 25                                                                                   |                   |
| <b>S7</b>  | >10                                                 | >50                                                                                  | 18                                                                                   | n/a                                                                                  | >50                                                                                  | >50                                                                                  | +                 |
|            |                                                     | >50                                                                                  | 31                                                                                   | >50                                                                                  | >50                                                                                  | 6.9                                                                                  |                   |
| <b>S13</b> | >50                                                 | 15                                                                                   | 49                                                                                   | >50                                                                                  | 19                                                                                   | 2.1                                                                                  | -                 |
|            |                                                     | 14                                                                                   | >50                                                                                  | >50                                                                                  | 19                                                                                   | 1.9                                                                                  |                   |
| <b>S21</b> | >10                                                 | >50                                                                                  | >50                                                                                  | n/a                                                                                  | >50                                                                                  | >50                                                                                  | ±                 |
|            |                                                     | >50                                                                                  | >50                                                                                  | >50                                                                                  | >50                                                                                  | 42                                                                                   |                   |
| <b>S33</b> | >10                                                 | >50                                                                                  | >50                                                                                  | >50                                                                                  | >50                                                                                  | >50                                                                                  | ±                 |
|            |                                                     | >50                                                                                  | >50                                                                                  | >50                                                                                  | >50                                                                                  | >50                                                                                  |                   |
| <b>S35</b> | >5                                                  | >5                                                                                   | >5                                                                                   | >5                                                                                   | >5                                                                                   | >5                                                                                   | ±                 |
|            |                                                     | >5                                                                                   | >5                                                                                   | >5                                                                                   | >5                                                                                   | >5                                                                                   |                   |

\*1 MBI : Mechanism-based inhibition

\*2 Pre : Preincubation

**The pharmacokinetic tests of eleven compounds.** Cytochrome P450 (CYP) inhibition was measured. The MBI criterion was as follows: an IC<sub>50</sub> ratio for inhibition with and without preincubation of 3 or more was labeled as “+”, and a ratio of inhibition pre (+)/pre (-) of 0.8 or less at an added concentration of 50  $\mu\text{M}$ , even if IC<sub>50</sub> was 50  $\mu\text{M}$  or more, was labeled as “±”.

**Additional file 10: Supplemental Table. 3**

**Table S4. The pharmacokinetic tests of 11 compounds**

| <b>Permeability</b> |                                                                 |                                        |                                                                 |                                        |  |
|---------------------|-----------------------------------------------------------------|----------------------------------------|-----------------------------------------------------------------|----------------------------------------|--|
| Compound #          | PAMPA<br>pH at 5.0<br>Permeability<br>(10 <sup>-6</sup> cm/sec) | PAMPA<br>pH at 5.0<br>Retension<br>(%) | PAMPA<br>pH at 7.4<br>Permeability<br>(10 <sup>-6</sup> cm/sec) | PAMPA<br>pH at 7.4<br>Retension<br>(%) |  |
| <b>4</b>            | 27.9 ± 0.6                                                      | 14 ± 2                                 | 51.6 ± 10.3                                                     | 18 ± 4                                 |  |
| <b>5</b>            | 30.9 ± 0.9                                                      | 16 ± 3                                 | 38.0 ± 2.4                                                      | 5 ± 4                                  |  |
| <b>2</b>            | 39.5 ± 2.7                                                      | 24 ± 4                                 | 21.7 ± 2.4                                                      | 0 ± 0                                  |  |
| <b>6</b>            | 28.7 ± 0.8                                                      | 13 ± 2                                 | 20.8 ± 1.6                                                      | 1 ± 1                                  |  |
| <b>7</b>            | 39.9 ± 6.2                                                      | 16 ± 3                                 | 69.4 ± 2.7                                                      | 5 ± 5                                  |  |
| <b>8</b>            | 34.9 ± 5.0                                                      | 15 ± 6                                 | 13.7 ± 0.5                                                      | 5 ± 1                                  |  |
| <b>S5</b>           | 35.7 ± 2.4                                                      | 10 ± 4                                 | 32.3 ± 1.6                                                      | 1 ± 2                                  |  |
| <b>S6</b>           | 33.4 ± 0.6                                                      | 13 ± 2                                 | 43.3 ± 7.7                                                      | 17 ± 3                                 |  |
| <b>S7</b>           | 45.4 ± 2.2                                                      | 33 ± 3                                 | 20.0 ± 0.9                                                      | 3 ± 3                                  |  |
| <b>S13</b>          | 28.8 ± 1.6                                                      | 6 ± 2                                  | 46.0 ± 2.2                                                      | 0 ± 0                                  |  |
| <b>S21</b>          | 21.3 ± 0.5                                                      | 7 ± 0                                  | 12.2 ± 1.3                                                      | 2 ± 2                                  |  |
| <b>S33</b>          | 42.0 ± 1.2                                                      | 6 ± 5                                  | 22.7 ± 4.8                                                      | 13 ± 3                                 |  |
| <b>S35</b>          | n/a                                                             | n/a                                    | n/a                                                             | n/a                                    |  |

  

| <b>Solubility</b> |                  |                       |                                 |                              |                                                          |
|-------------------|------------------|-----------------------|---------------------------------|------------------------------|----------------------------------------------------------|
| Compound #        | MW <sup>*1</sup> | ED <sub>50</sub> (nM) | Solubility<br>FaSSIF<br>(µg/mL) | Solubility<br>FaSSIF<br>(µM) | Ratio of<br>solubility<br>and ED <sub>50</sub><br>(fold) |
| <b>4</b>          | 327              | 1-2                   | 3.0                             | 9.17                         | >4585                                                    |
| <b>5</b>          | 345              | 0.2                   | 1.0                             | 2.90                         | 14493                                                    |
| <b>2</b>          | 363              | 0.5                   | 0.2                             | 0.55                         | 1102                                                     |
| <b>6</b>          | 345              | 2-5                   | 1.0                             | 2.90                         | >580                                                     |
| <b>7</b>          | 345              | 2-5                   | 0.6                             | 1.74                         | >348                                                     |
| <b>8</b>          | 363              | 2-5                   | 1.0                             | 2.75                         | >550                                                     |
| <b>S5</b>         | 349              | 1-2                   | 2.0                             | 5.73                         | >2865                                                    |
| <b>S6</b>         | 377              | 35% (100 nM)          | 32.0                            | 84.88                        | -                                                        |
| <b>S7</b>         | 341              | 1-10                  | 3.0                             | 8.80                         | >880                                                     |
| <b>S13</b>        | 328              | 1-10                  | 4.0                             | 12.20                        | >1220                                                    |
| <b>S21</b>        | 352              | 0.1-1.0               | 0.5                             | 1.42                         | >1420                                                    |
| <b>S33</b>        | 346              | 0.1-1.0               | 1.0                             | 2.89                         | >2890                                                    |
| <b>S35</b>        | 353              | <0.1                  | n/a                             | -                            | -                                                        |

\*1 MW : Molecular weight

**Additional file 11: Supplemental Schemes S1–S11.**

**Scheme S1.**

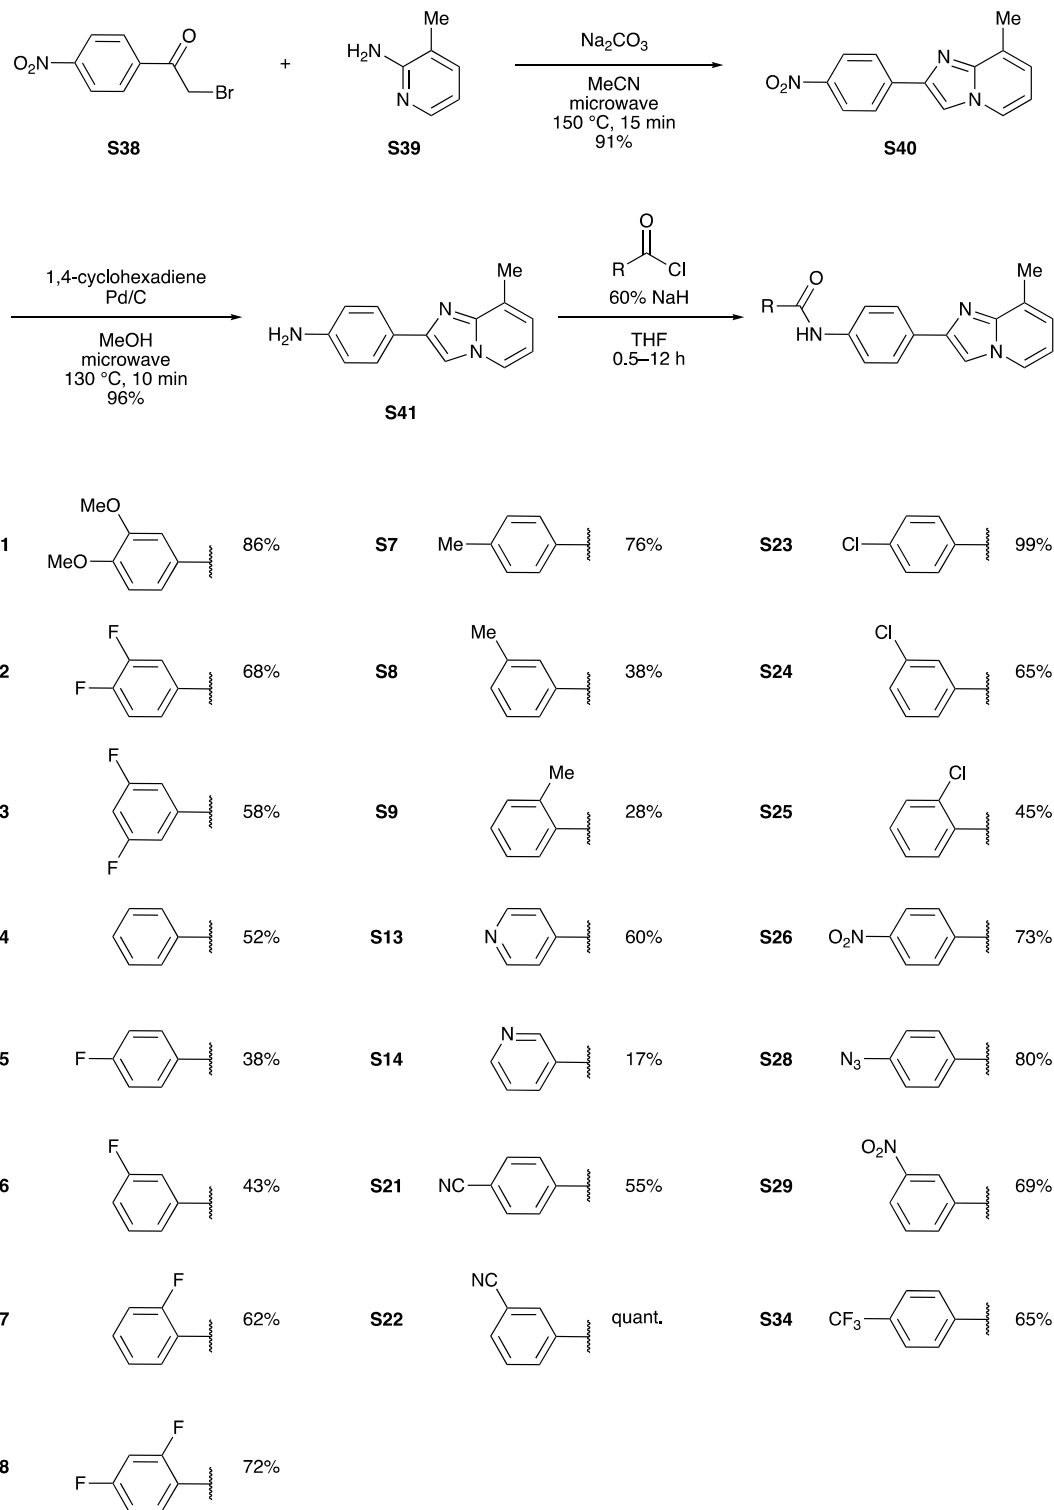

Scheme S2.

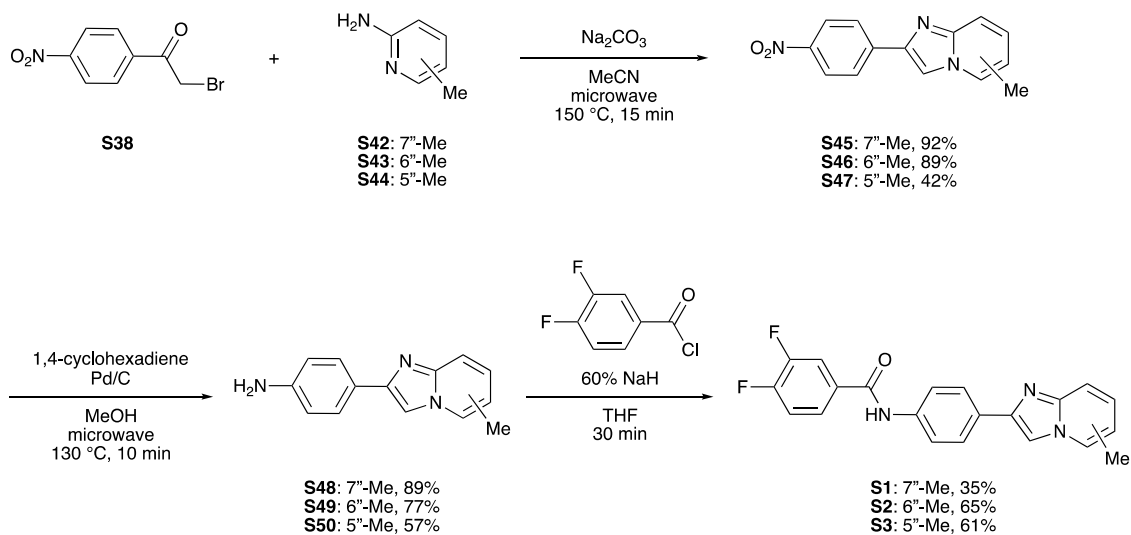

Scheme S3.

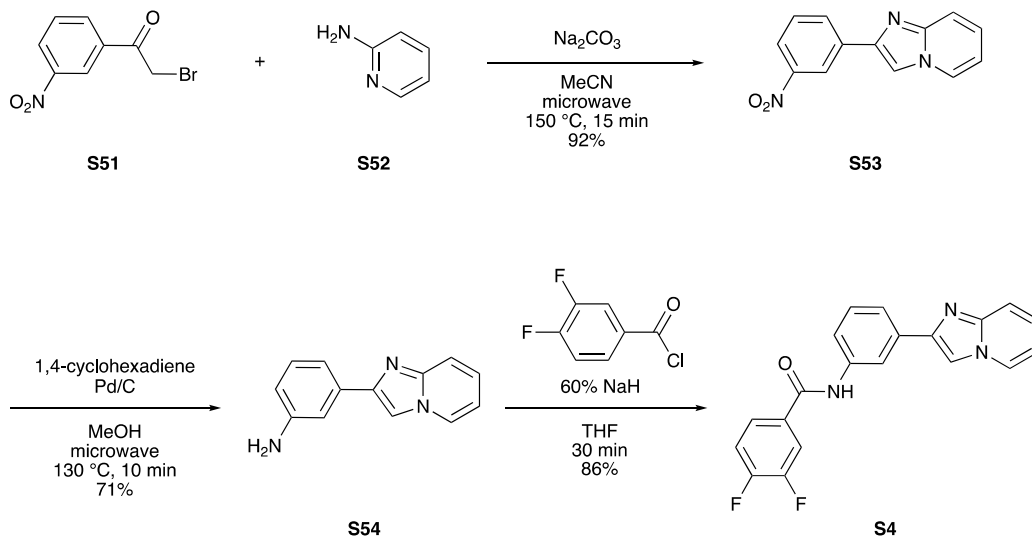

Scheme S4.

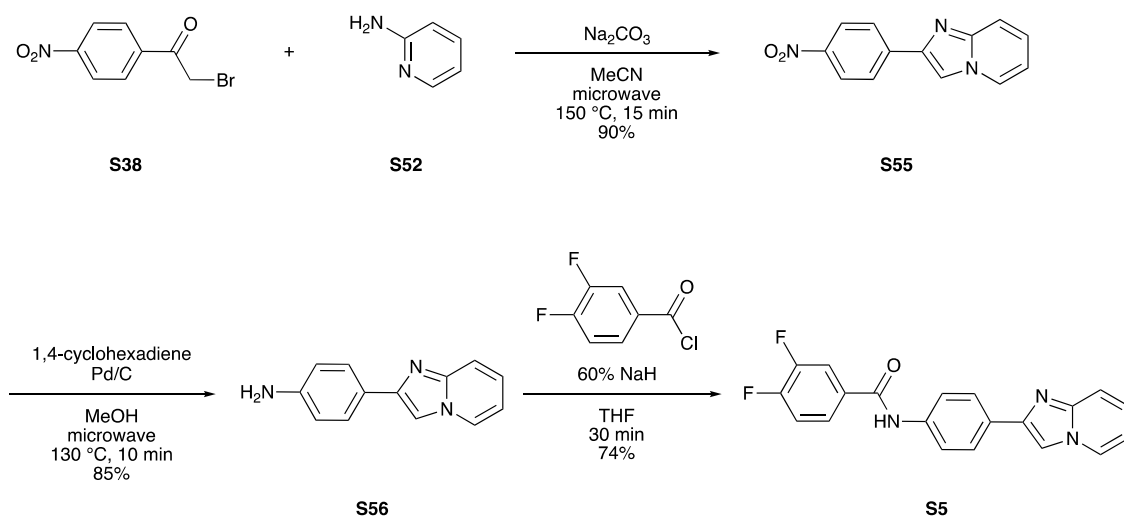

Scheme S5.

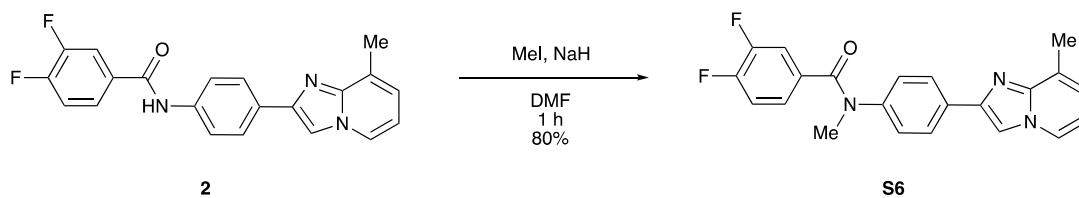

Scheme S6.

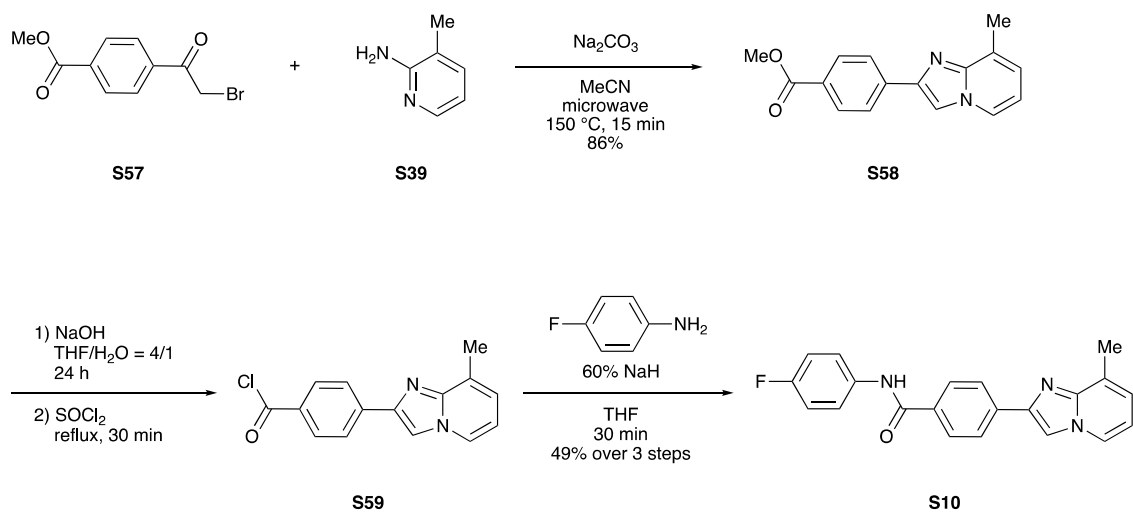

Scheme S7.

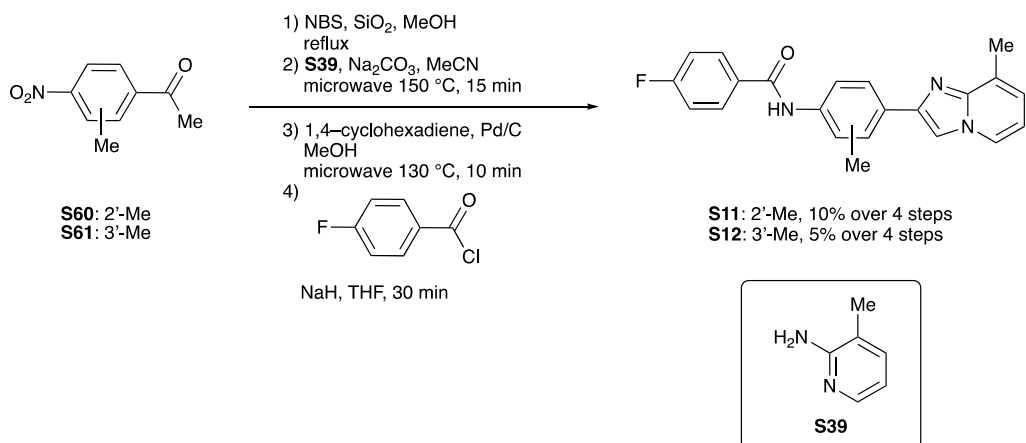

Scheme S8.

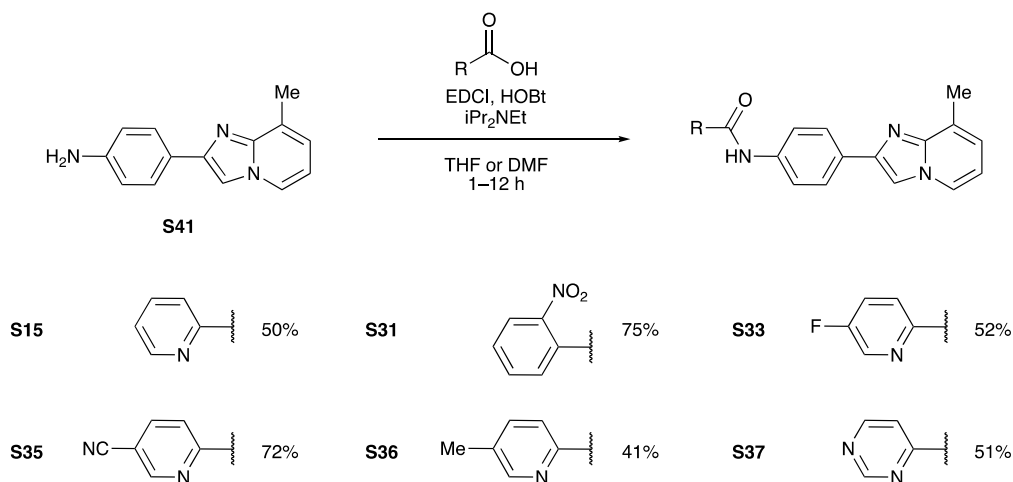

Scheme S9.

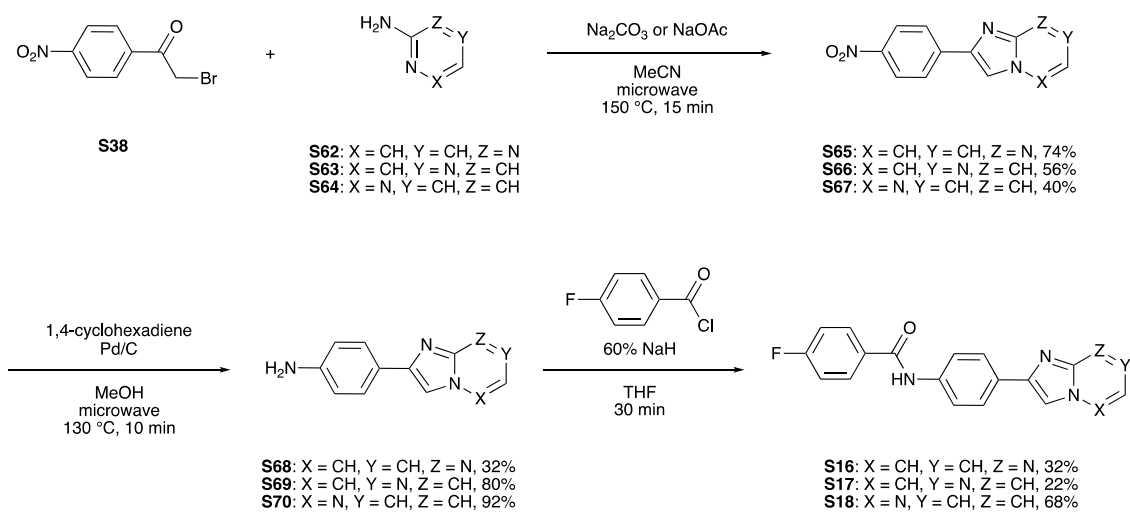

Scheme S10.

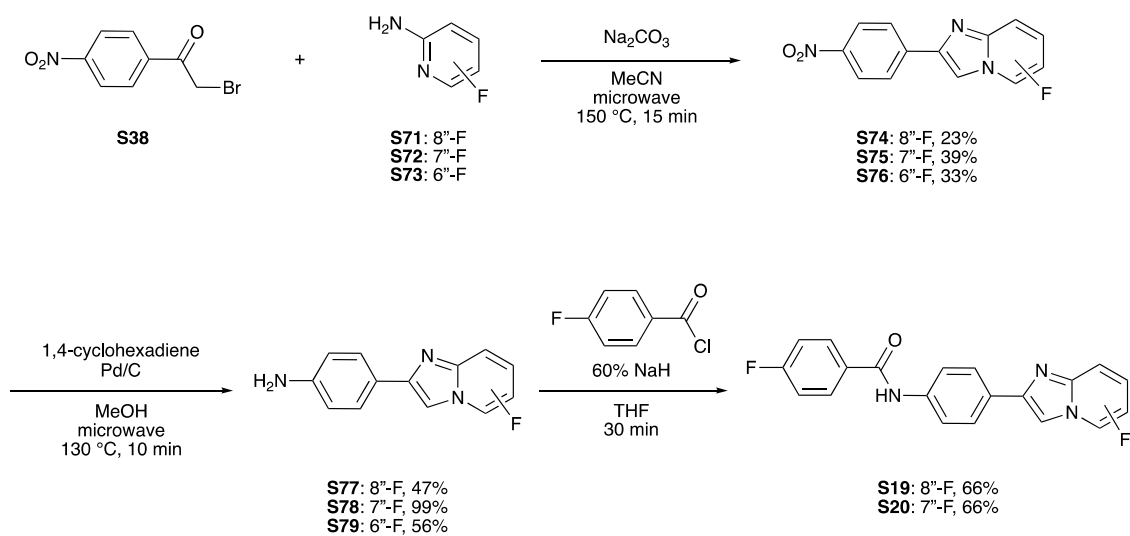

Scheme S11.

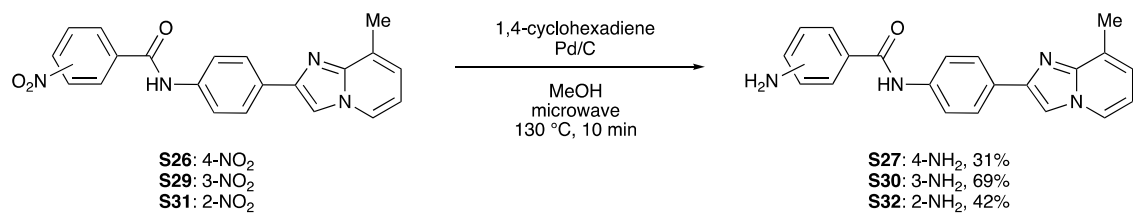



## **1. General experimental methods**

All reactions except those carried out in aqueous phase were performed under an inert atmosphere of argon or nitrogen, unless otherwise stated. Materials were purchased from commercial suppliers and used without further purification, unless otherwise stated. All microwave-assisted reactions were carried out under microwave irradiation conditions by using Biotage Initiator. All reactions requiring heating were heated by using SynFlex. Analytical thin layer chromatography (TLC) was performed on Merck silica gel 60 F<sub>254</sub> plates. Flash column chromatography was performed Biotage Isolera Prime using a SNAP cartridge (Biotage). <sup>1</sup>H and <sup>13</sup>C NMR spectra were recorded on Bruker Avance III HD 500 MHz, JEOL NMM-EC500, JNM-ECX400P, or JNM-ECX400 spectrometer and were calibrated using residual undeuterated solvent as the internal references (CDCl<sub>3</sub>: 7.26 ppm; CD<sub>3</sub>OD: 3.31 ppm; DMSO-*d*<sub>6</sub>: 2.50 ppm). The following abbreviations were used to explain NMR peak multiplicities: s = singlet, d = doublet, t = triplet, q = quartet, p = pentet, m = multiplet, br = broad. Coupling constant (*J*) was reported in hertz (Hz). Mass spectra were obtained on Waters SQ Detector2.

### **Cell culture**

SH-SY5Y cells and DJ-1-knockout SH-SY5Y cells were cultured in Dulbecco's modified Eagle's medium (DMEM) supplemented with 10% fetal calf serum at 37 °C. DJ-1-knockout SH-SY5Y cells were established as described previously (T. Niki, J. Endo, K. Takahashi-Niki, T. Yasuda, A. Okamoto, Y. Saito, H. Ariga, S. M. Iguchi-Ariga. *Brain Res.*, 2020, **1729**, 146641).

### **Cell viability assay**

Cells were cultured in a 96-well plate and treated with various amounts of compounds in the presence of 200 μM hydrogen peroxide (H<sub>2</sub>O<sub>2</sub>) added to the culture medium. Cell viability was assessed using the 3-(4,5-dimethylthiazol-2-yl)-5-(3-carboxymethoxyphenyl)-2-(4-sulfophenyl)-2H-tetrazolium inner salt (MTS) assay with a cell counting kit-8 (DOJINDO, Osaka, Japan). The absorbance was measured at 450 nm using a microplate reader (En Spire; Perkin Elmer, Waltham, MA, USA).

### **Microsomal stability assay**

The compound was diluted from a 10 μM stock to 200 nM using 0.65 mM β-NADPH solution. The assay incubation system consisted of the compound and 50 μL of 0.2 mg/mL of human microsomal (mixed sex, pool of 50 liver sample) or mouse microsomal proteins. The incubation was carried out at 37 °C for 35 min with shaking. After incubation, 400 μL of methanol was added to stop the reaction. To adjust the composition of the unreacted group, 50 μL of 0.2 mg protein/mL liver microsome solution was added. The sample was then incubated at -20 °C for 30 min and centrifuged (1830g, 10 min, 4 °C). The supernatant was analyzed using LC-MS/MS. HPLC liquid chromatography

system: LC-20A system (Shimadzu); analytical column: Mightysil RP-18GP · 2.0×50 mm, 3 µm (Kanto Chemical); mobile phase: (A) water/acetonitrile/acetic acid (90:10:1, v/v/v), (B) water/acetonitrile/acetic acid (20:80:1, v/v/v), 0.3 mL/min; tandem mass spectrometer: API 4000 (ESI), AB Sciex Pte. Ltd., Singapore; scan type: multiple reaction monitoring (MRM), *m/z* of precursor ions (Q1) and product ions (Q3) of each compound were monitored.

### CYP inhibition test

The substrate cocktail contained 10 mM phenacetin, 0.6 mM bupropion hydrochloride, 0.4 mM amodiaquine dihydrochloride, 2 mM diclofenac sodium, 8 mM (*S*)-mephenytoin, 1 mM bufuralol, and 0.5 mM midazolam. The DI inhibition mixture contained 0.2 mM  $\alpha$ -naphthoflavone, 30 mM quercetin dihydrate, 3 mM sulphaphenazole, 2 mM (*S*)-(+)- *N*-3-benzylrivanol, 0.6 mM quinidine anhydride, and 0.2 mM ketoconazole. The mechanism-based inhibition (MBI) mixture contained 1 mM furafylline, 20 mM suprofen, 6.8 mM ticlopidine hydrochloride, 1 mM paroxetine hydrochloride, and 200 mM erythromycin. The microsomal mixture contained 0.125 M phosphate buffer (pH 7.4), 4.125 mM magnesium chloride solution, and 0.05 mg protein/mL human liver microsomal. To prepare the samples, 5 µL of the test compound solution was mixed with 295 µL of the microsome-buffer mixture. After mixing, 30 µL of the preparation sample and 50 µL of the microsomal mixture were incubated at 37 °C for 5 min. For the preincubation (-) group, 10 µL of the substrate cocktail was added, whereas for the preincubation (+) group, 10 µL of the 13 mM  $\beta$ -NADPH solution was added, and the mixture was incubated at 37 °C for 30 min. For the preincubation (-) group, 10 µL of 13 mM  $\beta$ -NADPH solution was added, whereas for the preincubation (+) group, 10 µL of the substrate cocktail was added, and the mixture was incubated at 37 °C for 10 min. The incubation was stopped by adding 50 µL of methanol and 10 µL of internal standard solution, followed by further addition of 250 µL of methanol. The samples were then centrifuged (1830g, 10 min, 4 °C) and the supernatant was analyzed using LC/MS/MS (API4000, AB Sciex Pte. Ltd., Singapore). The residual activity rate was calculated using the metabolite-IS area ratio in each well and the metabolite-IS area ratio in the control group. The IC<sub>50</sub> values were calculated from the concentration plot. MBI (+) was assessed if the change in the IC<sub>50</sub> value due to preincubation was 3-fold or more. MBI (+/-) was assessed if the IC<sub>50</sub> value changed 2–3 times due to preincubation or if the preincubation (+)/preincubation (-) ratio was less than 0.8.

### PAMPA permeability method

The test compound (10 mmol/L) was diluted 200-fold with 5% dimethyl sulfoxide (DMSO) solution (pH 7.4 or 5.0) (pION Inc., Billerica, MA). The 200-fold diluted solution was centrifuged at 2200g for 10 min at 17 °C, and the supernatant was collected and used as the test compound solution. Next, 150 µL of the prepared test compound solution was added to the UV measurement plate and the

reference spectrum was measured. Two hundred microliter of the test compound solution was added to each donor plate. Subsequently, 4  $\mu$ L of GIT-0 lipid (pION Inc.) was applied to each filter of the acceptor plate, and 200  $\mu$ L of ASB-7.4 acceptor sink buffer (pION Inc.) was added to the acceptor plate. The acceptor plate was placed on the donor plate and incubated at 20 °C for 4 hours. After incubation, 150  $\mu$ L of the solution in acceptor and donor plates were sampled on the UV measurement plate, and the acceptor and donor spectra were measured using a UV plate reader (SpectraMax 190, Molecular Devices, San Jose, CA). If the spectrum of the compound was not observed, the concentration of the test compound on each UV measurement plate was measured using LC-MS (G1956B, Agilent, Santa Clara, CA). Finally, the membrane permeability coefficient (Pe) was calculated from the measurement results using the parallel artificial membrane permeability assay (PAMPA) software.

### **Solubility**

Permeability was measured in fasting-state simulated intestinal fluid (FaSSIF) medium. The compound was evaporated to dryness at 40 °C for 90 min. After confirming the dryness of the powder, 3  $\mu$ L of DMSO was added to dissolve it. Thereafter, 300  $\mu$ L of FaSSIF was added to the mixture, which was shaken for 90 min in a constant temperature shaker at 25 °C and allowed to stand at the same temperature for 16 hours or longer. The sample was then centrifuged at 2500  $\times$  g for 15 min at 25 °C, and the supernatant was assayed using UPLC (ACQUITY UPLC®, Waters Inc., Milford, MA).

### **Administration of 1-methyl-4-phenyl-1,2,3,6-tetrahydropyridine (MPTP) into mice**

Male wild-type C57BL/6J mice (8 weeks of age) were used in this experiment. The mice were purchased from Japan SLC, Inc and habituated to their cages for seven days. The mice were given Compound **5**, mixed with 10% DMSO and 10% 2-hydroxypropyl-beta-cyclodextrin (HPCD) in distilled water, through gavage administration. One hour before the administration of compound **5**, MPTP or saline (negative control) was injected intraperitoneally into the mice. The same combination of injections of **5** and MPTP was administered daily for four days, and rotor-rod tests were conducted five days after the first injection.

### **Rotarod test**

The rotor-rod test was performed using the method described previously<sup>8</sup>. In the present study, groups were divided by a stratified continuous randomization method using the latency after acclimation by rotor-rod as an index, and we used 10 rotor speeds: 3 rpm for 2 min on the first day, 12 rpm for 2 min on the second and third days of the habituation period, and 20 rpm for the experiments using MPTP-administered mice.

### Measurement of superoxide anion scavenging activity

Superoxide anions ( $O_2^-$ ) are generated by the reaction between hypoxanthine and xanthine oxidase. To measure  $O_2^-$  in the xanthine oxidase system, we used 7-dihydro-2-methyl-6-(4-methoxy-phenyl)imidazo[1,2-*a*]pyrazin-3-one (MPEC) to induce oxidation. The compound was dissolved in DMSO for further evaluation. Xanthine oxidase and hypoxanthine were prepared in 0.1 M phosphate buffer [0.1 M–KHPO–NaOH (pH 7.5) and 0.05 mM ethylene diamine tetra acetic acid]. The reaction mixture for the  $O_2^-$  scavenging activity test comprised 10  $\mu$ L of the test sample, 10  $\mu$ L of 300  $\mu$ M MPEC, 170  $\mu$ L of phosphate buffer, 60  $\mu$ L of xanthine oxidase-phosphate buffer (0.1 units/mL) and 50  $\mu$ L of 0.72 mM hypoxanthine-phosphate buffer. The generation of  $O_2^-$  was initiated by the addition of hypoxanthine. The reaction mixture (50  $\mu$ L) was poured into a 384-well plate (Becton Dickinson, Franklin Lakes, NJ, U.S.A.) and light emission was measured using a Wallac 1420 ARVOsx multilabel counter (Perkin Elmer, Wellesley, MA, USA). Superoxide anions were also generated by the reaction between NAD(P)<sup>+</sup> and nicotinamide adenine dinucleotide phosphate (NADPH) oxidase. Lucigenin was used to measure  $O_2^-$  in the NADPH oxidase system. The reaction mixture for the  $O_2^-$  scavenging activity test comprised 15  $\mu$ L of the test sample, 60  $\mu$ L of 50  $\mu$ M lucigenin, 15  $\mu$ L of 2 mM NADPH, 15  $\mu$ L of 2 mM NADH, and 0.1 M phosphate buffer (pH 11). Three micrograms of membrane fraction protein from the rat heart were added to the reaction solution, the total volume of the mixture was adjusted to 300  $\mu$ L, and light emission was measured. Using the same method as employed for the measurement in the mitochondria electron transport system, the composition of the reaction solution for the  $O_2^-$  scavenging activity test was 3  $\mu$ L of the test sample, 3  $\mu$ L of 2 mM lucigenin, 3  $\mu$ L of 600 mM succinate, 3  $\mu$ L of 17.8 mM adenosine diphosphate (ADP), 3  $\mu$ L of 200 mM NADH, 3  $\mu$ L of 200 mM potassium cyanide, and 0.1 M phosphate buffer (pH 9). Three-hundred micrograms of isolated mitochondria (respiratory control index = 6.68) from rat liver was added to the reaction mixture, the total volume of the mixture was adjusted to 300  $\mu$ L, and light emission was measured.

### Statistical analyses

Data are expressed as mean  $\pm$  standard error (SE). Statistical analyses were performed using a one-way analysis of variance (ANOVA) followed by an unpaired Student's *t*-test. The Tukey–Kramer test was used to compare multiple samples.

## **2. Preparation of compounds**

### **General Procedure A: Preparation of imidazo[1,2-*a*]pyridine derivatives.**

A mixture of an  $\alpha$ -bromoketone derivative (1 equiv.), a 2-aminopyridine derivative (1–2 equiv.), and base (0.7–1 equiv.) in acetonitrile was heated at 150 °C under microwave irradiation conditions for 15 min. The reaction was poured into water and the precipitated solid was collected, washed with 50% aq. acetonitrile, and dried *in vacuo* to give imidazo[1,2-*a*]pyridine derivatives.

### **General Procedure B: Reduction of a nitro group.**

A mixture of a nitro derivative (1 equiv.), 1,4-cyclohexadiene (10 equiv.), and 10% Pd/C (10% w/w) in methanol was heated at 130 °C under microwave irradiation conditions for 10 min, unless otherwise noted. The reaction was filtered and the residue was dried *in vacuo* to give amine derivatives.

### **General Procedure C: Amidation using an acid chloride.**

A mixture of amine (1 equiv.) and 60% NaH (1.2–2 equiv.) in THF was stirred at ambient temperature for 10 min, then acyl chloride (1 equiv.) was added to the mixture. The whole mixture was stirred at r.t. for 0.5–28 h. The reaction was quenched by addition of sat.  $\text{NH}_4\text{Cl}$ . The mixture was extracted with ethyl acetate and the organic phase was washed with water and brine, dried over  $\text{Na}_2\text{SO}_4$ , and concentrated *in vacuo*. The resulting residue was washed with 20 or 50% ethyl acetate in hexane and dried *in vacuo* to give the desired product.

### **General Procedure D: Amidation using a carboxylic acid.**

A mixture of carboxylic acid (2 equiv.), an amine derivative (1 equiv.), EDCI (2 equiv.), HOBt (2 equiv.), and DIPEA (5.5 equiv.) in DMF or THF was stirred at r.t. for 1 h–4 days. The reaction was poured into water. The water phase was extracted with ethyl acetate. The organic phase was washed with water and brine, dried over  $\text{Na}_2\text{SO}_4$ , and concentrated *in vacuo*. The resulting residue was washed with 20 or 50% ethyl acetate in hexane and dried *in vacuo* to give the desired product.

### **Preparation of acid chlorides**

A mixture of a benzoic acid derivative in thionyl chloride was heated under reflux for 30–60 min, then the reaction mixture was poured into toluene and concentrated *in vacuo* to give the corresponding acid chloride. The product was used for the next reaction without further purification.

### **Scheme S1**

#### **8-Methyl-2-(4-nitrophenyl)imidazo[1,2-*a*]pyridine (S40)**

Following general procedure A using **S38** (1.0 g, 8.2 mmol), **S39** (561  $\mu$ L, 4.1 mmol) and Na<sub>2</sub>CO<sub>3</sub> (318 mg, 3.0 mmol), the title compound **S40** (950 mg, 3.8 mmol) was obtained in 91% yield.

**<sup>1</sup>H NMR** (400 MHz, CDCl<sub>3</sub>):  $\delta$  8.28 (d, *J* = 9.2 Hz, 2H), 8.13 (d, *J* = 9.2 Hz, 2H), 8.01 (d, *J* = 6.8 Hz, 1H), 7.94 (s, 1H), 7.01 (d, *J* = 6.8 Hz, 1H), 6.74 (t, *J* = 8.5 Hz, 1H), 2.68 (s, 3H).

**LRMS** (ESI): *m/z* [M+H]<sup>+</sup> calcd. for C<sub>14</sub>H<sub>2</sub>N<sub>3</sub>O<sub>2</sub><sup>+</sup> 254, found 254.

#### **8-Methyl-2-(4-aminophenyl)imidazo[1,2-*a*]pyridine (S41)**

Following general procedure B using **S40** (500 mg, 2.0 mmol), 1,4-cyclohexadiene (1.8 mL, 20 mmol) and 10% Pd/C (50 mg), the title compound **S41** (423 mg, 3.8 mmol) was obtained in 96% yield.

**<sup>1</sup>H NMR** (400 MHz, CDCl<sub>3</sub>):  $\delta$  7.92 (d, *J* = 7.2 Hz, 1H), 7.75 (d, *J* = 8.4 Hz, 2H), 7.71 (s, 1H), 6.90 (d, *J* = 7.2 Hz, 1H), 6.73 (d, *J* = 8.4 Hz, 2H), 6.63 (t, *J* = 7.2 Hz, 1H), 2.64 (s, 3H).

**LRMS** (ESI): *m/z* [M+H]<sup>+</sup> calcd. for C<sub>14</sub>H<sub>14</sub>N<sub>3</sub><sup>+</sup> 224, found 224.

#### **3,4,5-Trimethoxy-*N*-(4-(8-methylimidazo[1,2-*a*]pyridin-2-yl)phenyl)benzamide (Compound-23)**

Following general procedure C using **S41** (48.9 mg, 0.22 mmol), 3,4,5-trimethoxybenzoyl chloride (87.6 mg, 0.36 mmol) and 60% NaH (18.4 mg, 0.46 mmol), the title compound (130 mg) was obtained in 81% yield.

**<sup>1</sup>H NMR** (500 MHz, DMSO-*d*<sub>6</sub>):  $\delta$  10.31 (s, 1H), 8.47 (d, *J* = 6.5 Hz, 1H), 8.45 (s, 1H), 8.00 (d, *J* = 8.5 Hz, 2H), 7.90 (d, *J* = 8.5 Hz, 2H), 7.33 (s, 2H), 7.23 (d, *J* = 5.0 Hz, 1H), 6.96 (t, *J* = 6.5 Hz, 1H), 3.90 (s, 6H), 3.75 (s, 3H), 2.58 (s, 3H).

**<sup>13</sup>C NMR** (125 MHz, DMSO-*d*<sub>6</sub>):  $\delta$  164.9, 152.6, 144.0, 141.6, 140.4, 139.2, 129.9, 127.5, 126.2, 125.6, 125.2, 125.0, 120.7, 113.4, 109.6, 105.4, 60.1, 56.1, 16.7.

**HRMS** (ESI): *m/z* [M+H]<sup>+</sup> calcd for C<sub>24</sub>H<sub>24</sub>N<sub>3</sub>O<sub>4</sub><sup>+</sup> 418.1761, found 418.1769.

#### **3,4-Dimethoxy-*N*-(4-(8-methylimidazo[1,2-*a*]pyridin-2-yl)phenyl)benzamide (1)**

Following general procedure C using **S41** (48.9 mg, 0.22 mmol), 3,4-dimethoxybenzoyl chloride (53 mg, 0.26 mmol) and 60% NaH (11 mg, 0.26 mmol), the title compound **1** (73.1 mg, 0.18 mmol) was obtained in 86% yield.

**<sup>1</sup>H NMR** (500 MHz, DMSO-*d*<sub>6</sub>):  $\delta$  10.20 (s, 1H), 8.41 (d, *J* = 6.5 Hz, 1H), 8.38 (s, 1H), 7.97 (d, *J* = 9.0 Hz, 2H), 7.88 (d, *J* = 9.0 Hz, 2H), 7.66 (dd, *J* = 8.0, 2.0 Hz, 1H), 7.57 (d, *J* = 2.0 Hz, 1H), 7.13 (br d, *J* = 6.5 Hz, 1H), 7.09 (d, *J* = 8.5 Hz, 1H), 6.87 (t, *J* = 6.5 Hz, 1H), 3.86 (s, 3H), 3.85 (s, 3H), 2.55 (s, 3H).

**<sup>13</sup>C NMR** (125 MHz, DMSO-*d*<sub>6</sub>):  $\delta$  164.9, 151.7, 148.3, 144.6, 139.1, 128.3, 126.9, 126.0, 125.5,

124.8, 124.5, 121.1, 120.5, 112.79, 122.77, 111.05, 110.9, 109.3, 55.68, 55.64, 16.7.

**HRMS** (ESI):  $m/z$   $[M+H]^+$  calcd. for  $C_{23}H_{22}N_3O_3^+$  388.1656, found 388.1664.

### **3,4-Difluoro-*N*-(4-(8-methylimidazo[1,2-*a*]pyridin-2-yl)phenyl)benzamide (2)**

Following general procedure C using **S41** (85 mg, 0.38 mmol), 3,4-difluorobenzoyl chloride (67 mg, 0.38 mmol) and 60% NaH (18 mg, 0.46 mmol), the title compound **2** (49 mg, 0.13 mmol) was obtained in 68% yield.

**$^1H$  NMR** (500 MHz, DMSO- $d_6$ ):  $\delta$  10.40 (s, 1H), 8.38 (d,  $J$  = 6.5 Hz, 1H), 8.35 (s, 1H), 8.10–8.05 (m, 1H), 7.98 (d,  $J$  = 8.5 Hz, 2H), 7.92–7.88 (m, 1H), 7.86 (d,  $J$  = 8.5 Hz, 2H), 7.65 (dt,  $J$  = 10.5, 8.5 Hz, 1H), 7.05 (d,  $J$  = 7.0 Hz, 1H), 6.81 (t,  $J$  = 7.0 Hz, 1H), 3.80 (s, 3H), 3.78 (s, 3H), 2.54 (s, 3H).

**$^{13}C$  NMR** (125 MHz, DMSO- $d_6$ ):  $\delta$  163.1, 151.5 (dd,  $^1J_{C-F}$  = 250.4,  $^2J_{C-F}$  = 12.8 Hz), 149.2 (dd,  $^1J_{C-F}$  = 245.4,  $^2J_{C-F}$  = 13.1 Hz), 143.5, 148.2, 145.3, 143.5, 138.3, 132.3, 129.7, 126.0, 125.9, 125.3, 124.6, 123.3, 120.5, 117.6 (d,  $^2J_{C-F}$  = 17.5 Hz), 117.2 (d,  $^2J_{C-F}$  = 18.3 Hz), 112.1, 109.2, 16.7.

**HRMS** (ESI):  $m/z$   $[M+H]^+$  calcd. for  $C_{21}H_{16}F_2N_3O^+$  364.1256, found 364.1263

### **2,5-Difluoro-*N*-(4-(8-methylimidazo[1,2-*a*]pyridin-2-yl)phenyl)benzamide (3)**

Following general procedure C using **S41** (85 mg, 0.38 mmol), 3,5-difluorobenzoyl chloride (67 mg, 0.38 mmol) and 60% NaH (18 mg, 0.46 mmol), the title compound **3** (40 mg, 0.11 mmol) was obtained in 58% yield.

**$^1H$  NMR** (500 MHz, DMSO- $d_6$ ):  $\delta$  10.43 (s, 1H), 8.37 (d,  $J$  = 6.5 Hz, 1H), 8.34 (s, 1H), 7.98 (d,  $J$  = 8.5 Hz, 2H), 7.85 (d,  $J$  = 8.5 Hz, 2H), 7.74–7.67 (m, 2H), 7.57–7.50 (m, 1H), 7.05 (d,  $J$  = 7.0 Hz, 1H), 6.79 (t,  $J$  = 7.0 Hz, 1H), 2.53 (s, 3H).

**$^{13}C$  NMR** (125 MHz, DMSO- $d_6$ ):  $\delta$  162.8, 162.2 (dd,  $^1J_{C-F}$  = 245.6,  $^3J_{C-F}$  = 12.5 Hz), 145.3, 143.5, 138.5 (t,  $^4J_{C-F}$  = 8.6 Hz), 138.1, 129.9, 126.0, 125.9, 124.6, 123.3, 120.6, 112.1, 111.3–111.0 (m), 109.2, 107.0 (t,  $^2J_{C-F}$  = 26.0 Hz), 16.7.

**HRMS** (ESI):  $m/z$   $[M+H]^+$  calcd. for  $C_{21}H_{16}F_2N_3O^+$  364.1256, found 364.1261

### ***N*-(4-(8-Methylimidazo[1,2-*a*]pyridin-2-yl)phenyl)benzamide (4)**

Following general procedure C using **S41** (85 mg, 0.38 mmol), benzoyl chloride (76 mg, 0.38 mmol) and 60% NaH (18 mg, 0.46 mmol), the title compound **4** (73.1 mg, 0.18 mmol) was obtained in 86% yield.

**$^1H$  NMR** (500 MHz, DMSO- $d_6$ ):  $\delta$  10.35 (s, 1H), 8.02–7.96 (m, 4H), 7.89 (d,  $J$  = 8.5 Hz, 2H), 7.85 (d,  $J$  = 8.5 Hz, 2H), 7.61 (t,  $J$  = 7.0 Hz, 1H), 7.56 (t,  $J$  = 7.0 Hz, 2H), 7.05 (d,  $J$  = 7.0 Hz, 1H), 6.80 (t,  $J$  = 7.0 Hz, 1H), 2.55 (s, 3H).

**$^{13}C$  NMR** (125 MHz, DMSO- $d_6$ ):  $\delta$  165.5, 145.3, 143.6, 138.7, 135.0, 131.6, 129.5, 128.4, 127.7, 126.0, 125.8, 124.5, 123.3, 120.4, 112.1, 109.1, 16.7.

**HRMS** (ESI):  $m/z$   $[M+H]^+$  calcd. for  $C_{21}H_{18}N_3O^+$  328.1444, found 328.1451.

**4-Fluoro-*N*-(4-(8-methylimidazo[1,2-*a*]pyridin-2-yl)phenyl)benzamide (5)**

Following general procedure C using **S41** (85 mg, 0.38 mmol), 4-fluorobenzoyl chloride (60 mg, 0.38 mmol) and 60% NaH (18 mg, 0.46 mmol), the title compound **5** (30 mg, 0.09 mmol) was obtained in 38% yield.

**$^1H$  NMR** (500 MHz, DMSO- $d_6$ ):  $\delta$  10.35 (s, 1H), 8.36 (d,  $J$  = 6.5 Hz, 1H), 8.33 (s, 1H), 8.09–8.04 (m, 2H), 7.97 (d,  $J$  = 8.5 Hz, 2H), 7.86 (d,  $J$  = 8.5 Hz, 2H), 7.38 (t,  $J$  = 8.5 Hz, 2H), 7.05 (d,  $J$  = 7.0 Hz, 1H), 6.78 (t,  $J$  = 7.0 Hz, 1H), 2.55 (s, 3H).

**$^{13}C$  NMR** (125 MHz, DMSO- $d_6$ ):  $\delta$  165.1, 164.1 (d,  $^1J_{C-F}$  = 247.5 Hz), 145.3, 143.6, 138.5, 131.4 (d,  $^4J_{C-F}$  = 2.8 Hz), 130.4 (d,  $^3J_{C-F}$  = 9.0 Hz), 129.5, 126.0, 125.8, 124.5, 123.3, 120.5, 115.3 (d,  $^2J_{C-F}$  = 21.6 Hz), 112.1, 109.1, 16.7.

**HRMS** (ESI):  $m/z$   $[M+H]^+$  calcd. for  $C_{21}H_{17}FN_3O^+$  346.1350, found 346.1361.

**3-Fluoro-*N*-(4-(8-methylimidazo[1,2-*a*]pyridin-2-yl)phenyl)benzamide (6)**

Following general procedure C using **S41** (85 mg, 0.38 mmol), 3-fluorobenzoyl chloride (60 mg, 0.38 mmol) and 60% NaH (18 mg, 0.46 mmol), the title compound **6** (34 mg, 0.10 mmol) was obtained in 43% yield.

**$^1H$  NMR** (500 MHz, DMSO- $d_6$ ):  $\delta$  10.41 (s, 1H), 8.38 (d,  $J$  = 7.0 Hz, 1H), 8.35 (s, 1H), 7.99 (d,  $J$  = 8.5 Hz, 2H), 7.90–7.79 (m, 4H), 7.64–7.58 (m, 1H), 7.50–7.44 (m, 1H), 7.05 (dt,  $J$  = 7.0, 1.0 Hz, 1H), 6.80 (t,  $J$  = 7.0 Hz, 1H), 2.55 (s, 3H).

**$^{13}C$  NMR** (125 MHz, DMSO- $d_6$ ):  $\delta$  164.1, 161.9 (d,  $^1J_{C-F}$  = 242.6 Hz), 145.3, 143.6, 138.3, 137.2 (d,  $^3J_{C-F}$  = 6.8 Hz), 130.6 (d,  $^3J_{C-F}$  = 8.0 Hz), 129.7, 126.0, 125.9, 124.5, 123.9 (d,  $^3J_{C-F}$  = 2.6 Hz), 123.3, 120.5, 118.5 (d,  $^2J_{C-F}$  = 21.3 Hz), 114.5 (d,  $^2J_{C-F}$  = 22.6 Hz), 112.1, 109.1, 16.7.

**HRMS** (ESI):  $m/z$   $[M+H]^+$  calcd. for  $C_{21}H_{17}FN_3O^+$  346.1350, found 346.1359.

**2-Fluoro-*N*-(4-(8-methylimidazo[1,2-*a*]pyridin-2-yl)phenyl)benzamide (7)**

Following general procedure C using **S41** (85 mg, 0.38 mmol), 2-fluorobenzoyl chloride (60 mg, 0.38 mmol) and 60% NaH (18 mg, 0.46 mmol), the title compound **7** (30 mg, 0.09 mmol) was obtained in 62% yield.

**$^1H$  NMR** (500 MHz, DMSO- $d_6$ ):  $\delta$  10.51 (s, 1H), 8.38 (d,  $J$  = 7.0 Hz, 1H), 8.34 (s, 1H), 7.98 (d,  $J$  = 8.5 Hz, 2H), 7.82 (d,  $J$  = 8.5 Hz, 2H), 7.73–7.68 (m, 1H), 7.63–7.57 (m, 1H), 7.40–7.33 (m, 2H), 7.05 (dt,  $J$  = 7.0, 1.0 Hz, 1H), 6.80 (t,  $J$  = 7.0 Hz, 1H), 2.55 (s, 3H).

**$^{13}C$  NMR** (125 MHz, DMSO- $d_6$ ):  $\delta$  162.7, 158.9 (d,  $^1J_{C-F}$  = 247.1 Hz), 145.3, 143.5, 138.3, 132.5 (d,  $^3J_{C-F}$  = 8.3 Hz), 129.9, 129.8 (d,  $^2J_{C-F}$  = 29.3 Hz), 126.01, 125.96, 125.1 (d,  $^3J_{C-F}$  = 15.1 Hz), 124.58, 124.54, 123.3, 119.8, 116.2 (d,  $^2J_{C-F}$  = 21.5 Hz), 112.1, 109.1, 16.7.

**HRMS** (ESI):  $m/z$   $[M+H]^+$  calcd. for  $C_{21}H_{17}FN_3O^+$  346.1350, found 346.1356.



#### **2,4-Difluoro-*N*-(4-(8-methylimidazo[1,2-*a*]pyridin-2-yl)phenyl)benzamide (8)**

Following general procedure C using **S41** (85 mg, 0.38 mmol), 2,4-difluorobenzoyl chloride (67 mg, 0.38 mmol) and 60% NaH (18 mg, 0.46 mmol), the title compound **8** (59 mg, 0.21 mmol) was obtained in 72% yield.

**<sup>1</sup>H NMR** (500 MHz, DMSO-*d*<sub>6</sub>): δ 10.59 (s, 1H), 8.44 (d, *J* = 6.5 Hz, 1H), 8.42 (s, 1H), 8.00 (d, *J* = 9.0 Hz, 2H), 7.86–7.76 (m, 3H), 7.48–7.41 (m, 1H), 7.25 (td, *J* = 8.5, 2.0 Hz, 1H), 7.15 (d, *J* = 6.5 Hz, 1H), 6.89 (t, *J* = 6.5 Hz, 1H), 2.57 (s, 3H).

**<sup>13</sup>C NMR** (125 MHz, DMSO-*d*<sub>6</sub>): δ 163.4 (dd, <sup>1</sup>*J*<sub>(C-F)</sub> = 248.1, <sup>3</sup>*J*<sub>(C-F)</sub> = 12.3 Hz), 161.9, 159.6 (d, <sup>1</sup>*J*<sub>(C-F)</sub> = 250.6, <sup>3</sup>*J*<sub>(C-F)</sub> = 12.9 Hz), 144.5, 142.2, 138.6, 131.9–131.6 (m), 128.5, 126.2, 125.5, 124.9, 124.7, 121.8–121.5 (m), 119.9, 112.9, 112.0–111.7 (m), 109.1, 104.7 (t, <sup>2</sup>*J*<sub>(C-F)</sub> = 26.1 Hz), 16.7.

**HRMS** (ESI): *m/z* [M+H]<sup>+</sup> calcd. for C<sub>21</sub>H<sub>16</sub>F<sub>2</sub>N<sub>3</sub>O<sup>+</sup> 364.1256, found 364.1269.

#### **4-Methyl-*N*-(4-(8-methylimidazo[1,2-*a*]pyridin-2-yl)phenyl)benzamide (S7)**

Following general procedure C using **S41** (44.7 mg, 0.2 mmol), 4-methylbenzoyl chloride (26 μL, 0.2 mmol) and 60% NaH (12 mg, 0.3 mmol), the title compound **S7** (52 mg, 0.15 mmol) was obtained in 76% yield.

**<sup>1</sup>H NMR** (500 MHz, DMSO-*d*<sub>6</sub>): δ 10.24 (s, 1H), 8.37 (d, *J* = 6.5 Hz, 1H), 8.33 (s, 1H), 7.96 (d, *J* = 8.5 Hz, 2H), 7.90 (d, *J* = 8.0 Hz, 2H), 7.87 (d, *J* = 8.5 Hz, 2H), 7.35 (d, *J* = 8.0 Hz, 2H), 7.04 (d, *J* = 7.0 Hz, 1H), 6.80 (t, *J* = 6.5 Hz, 1H), 2.54 (s, 3H), 2.40 (s, 3H).

**<sup>13</sup>C NMR** (125 MHz, DMSO-*d*<sub>6</sub>): δ 165.4, 145.2, 143.6, 141.6, 138.8, 132.1, 129.2, 128.9, 127.7, 125.9, 125.8, 124.5, 123.4, 120.4, 112.2, 109.1, 21.0, 16.7.

**HRMS** (ESI): *m/z* [M+H]<sup>+</sup> calcd. for C<sub>22</sub>H<sub>20</sub>N<sub>3</sub>O<sup>+</sup> 342.1601, found 342.1613.

#### **3-Methyl-*N*-(4-(8-methylimidazo[1,2-*a*]pyridin-2-yl)phenyl)benzamide (S8)**

Following general procedure C using **S41** (44.7 mg, 0.2 mmol), 3-methylbenzoyl chloride (26 μL, 0.2 mmol) and 60% NaH (12 mg, 0.3 mmol), the title compound **S8** (26 mg, 0.076 mmol) was obtained in 38% yield.

**<sup>1</sup>H NMR** (500 MHz, DMSO-*d*<sub>6</sub>): δ 10.29 (s, 1H), 8.36 (d, *J* = 7.0 Hz, 1H), 8.33 (s, 1H), 7.97 (d, *J* = 8.5 Hz, 2H), 7.88 (d, *J* = 8.5 Hz, 2H), 7.81–7.75 (m, 2H), 7.45–7.38 (m, 2H), 7.03 (d, *J* = 7.0 Hz, 1H), 6.78 (t, *J* = 7.0 Hz, 1H), 2.54 (s, 3H), 2.41 (s, 3H).

**<sup>13</sup>C NMR** (125 MHz, DMSO-*d*<sub>6</sub>): δ 165.6, 145.3, 143.7, 138.7, 137.7, 135.0, 132.1, 129.4, 128.3, 128.1, 126.0, 125.8, 124.8, 124.5, 123.3, 120.4, 112.1, 109.1, 21.0, 16.7.

**HRMS** (ESI): *m/z* [M+H]<sup>+</sup> calcd. for C<sub>22</sub>H<sub>20</sub>N<sub>3</sub>O<sup>+</sup> 342.1601, found 342.1611.

#### **2-Methyl-*N*-(4-(8-methylimidazo[1,2-*a*]pyridin-2-yl)phenyl)benzamide (S9)**

Following general procedure C using **S41** (29 mg, 0.13 mmol), 2-methylbenzoyl chloride (17  $\mu$ L, 0.13 mmol) and 60% NaH (12 mg, 0.3 mmol), the title compound **S9** (13 mg, 0.037 mmol) was obtained in 28% yield.

**$^1\text{H}$  NMR** (500 MHz, DMSO- $d_6$ ):  $\delta$  10.38 (s, 1H), 8.36 (d,  $J$  = 7.0 Hz, 1H), 8.32 (s, 1H), 7.95 (d,  $J$  = 8.5 Hz, 2H), 7.83 (d,  $J$  = 8.5 Hz, 2H), 7.48 (d,  $J$  = 7.5 Hz, 1H), 7.42–7.27 (m, 3H), 7.04 (d,  $J$  = 7.0 Hz, 1H), 6.79 (t,  $J$  = 7.0 Hz, 1H), 2.53 (s, 3H), 2.41 (s, 3H).

**$^{13}\text{C}$  NMR** (125 MHz, DMSO- $d_6$ ):  $\delta$  167.8, 145.3, 143.6, 138.8, 137.2, 135.2, 130.5, 129.6, 129.3, 129.2, 127.2, 126.0, 125.9, 125.6, 124.5, 123.3, 112.1, 109.1, 19.3, 16.7.

**HRMS** (ESI):  $m/z$   $[\text{M}+\text{H}]^+$  calcd. for  $\text{C}_{22}\text{H}_{20}\text{N}_3\text{O}^+$  342.1601, found 342.1606.

#### ***N*-(4-(8-Methylimidazo[1,2-*a*]pyridin-2-yl)phenyl)isonicotinamide (S13)**

Following general procedure C using **S41** (44.7 mg, 0.2 mmol), isonicotinoyl chloride (35.6 mg, 0.2 mmol) and 60% NaH (20 mg, 0.5 mmol), the title compound **S13** (40 mg, 0.12 mmol) was obtained in 60% yield.

**$^1\text{H}$  NMR** (500 MHz, DMSO- $d_6$ ):  $\delta$  10.65 (s, 1H), 8.79 (d,  $J$  = 5.5 Hz, 1H), 8.37 (d,  $J$  = 6.5 Hz, 1H), 8.35 (s, 1H), 7.98 (d,  $J$  = 8.5 Hz, 2H), 7.93–7.85 (m, 4H), 7.04 (d,  $J$  = 6.5 Hz, 1H), 6.79 (t,  $J$  = 6.5 Hz, 1H), 2.53 (s, 3H).

**$^{13}\text{C}$  NMR** (125 MHz, DMSO- $d_6$ ):  $\delta$  163.9, 150.3, 145.3, 143.5, 141.9, 138.1, 139.0, 126.0, 125.9, 124.6, 123.4, 121.6, 120.6, 112.2, 109.3, 16.7.

**HRMS** (ESI):  $m/z$   $[\text{M}+\text{H}]^+$  calcd. for  $\text{C}_{20}\text{H}_{17}\text{N}_4\text{O}^+$  329.1397, found 329.1417.

#### ***N*-(4-(8-Methylimidazo[1,2-*a*]pyridin-2-yl)phenyl)nicotinamide (S14)**

Following general procedure C using **S41** (44.7 mg, 0.2 mmol), nicotinoyl chloride (35.6 mg, 0.2 mmol) and 60% NaH (12 mg, 0.3 mmol), the title compound **S14** (11 mg, 0.04 mmol) was obtained in 17% yield.

**$^1\text{H}$  NMR** (500 MHz, DMSO- $d_6$ ):  $\delta$  10.53 (s, 1H), 9.13 (d,  $J$  = 1.0 Hz, 1H), 8.77 (d,  $J$  = 4.0 Hz, 1H), 8.37 (d,  $J$  = 6.5 Hz, 1H), 8.34 (s, 1H), 8.32 (dt,  $J$  = 8.0, 2.0 Hz, 1H), 7.98 (d,  $J$  = 8.5 Hz, 2H), 7.86 (d,  $J$  = 8.5 Hz, 2H), 7.58 (dd,  $J$  = 8.0, 5.0 Hz, 1H), 7.04 (d,  $J$  = 7.0 Hz, 1H), 6.79 (t,  $J$  = 7.0 Hz, 1H), 2.53 (s, 3H).

**$^{13}\text{C}$  NMR** (125 MHz, DMSO- $d_6$ ):  $\delta$  164.0, 152.1, 148.7, 145.3, 143.6, 138.3, 135.5, 130.6, 129.8, 126.0, 125.9, 124.6, 123.5, 123.3, 120.5, 112.1, 109.2, 16.7.

**HRMS** (ESI):  $m/z$   $[\text{M}+\text{H}]^+$  calcd. for  $\text{C}_{20}\text{H}_{17}\text{N}_4\text{O}^+$  329.1397, found 329.1407.

#### **4-Cyano-*N*-(4-(8-methylimidazo[1,2-*a*]pyridin-2-yl)phenyl)benzamide (S21)**

Following general procedure C using **S41** (1.28 g, 5.74 mmol), 4-cyanobenzoyl chloride (0.95 g, 5.74 mmol), and 60% NaH (344 mg, 8.61 mmol), the title compound **S21** (1.1 g, 3.15 mmol) was obtained

in 55% yield.

**<sup>1</sup>H NMR** (500 MHz, DMSO-*d*<sub>6</sub>): δ 10.57 (s, 1H), 8.37 (d, *J* = 7.0 Hz, 1H), 8.35 (s, 1H), 8.14 (d, *J* = 8.5 Hz, 2H), 8.05 (d, *J* = 8.5 Hz, 2H), 7.99 (d, *J* = 9.0 Hz, 2H), 7.88 (d, *J* = 9.0 Hz, 1H), 7.05 (d, *J* = 6.5 Hz, 1H), 6.80 (t, *J* = 6.5 Hz, 1H), 2.54 (s, 3H).

**<sup>13</sup>C NMR** (125 MHz, DMSO-*d*<sub>6</sub>): δ 164.1, 145.3, 143.5, 139.0, 138.2, 132.5, 129.9, 128.5, 126.0, 125.9, 124.5, 123.3, 120.5, 118.3, 113.8, 112.1, 109.2, 16.7.

**HRMS** (ESI): *m/z* [M+H]<sup>+</sup> calcd for C<sub>22</sub>H<sub>17</sub>N<sub>4</sub>O<sup>+</sup> 353.1397, found 353.1410.

### 3-Cyano-*N*-(4-(8-methylimidazo[1,2-*a*]pyridin-2-yl)phenyl)benzamide (S22)

Following general procedure C using **S41** (44.7 mg, 0.2 mmol), 3-cyanobenzoyl chloride (26 μL, 0.2 mmol) and 60% NaH (20 mg, 0.5 mmol), the title compound **S22** (81 mg, 0.22 mmol) was obtained in quantitative yield.

**<sup>1</sup>H NMR** (500 MHz, DMSO-*d*<sub>6</sub>): δ 10.52 (s, 1H), 8.48–8.25 (m, 4H), 8.09 (d, *J* = 7.5 Hz, 1H), 8.00 (d, *J* = 8.0 Hz, 2H), 7.88 (d, *J* = 8.0 Hz, 2H), 7.78 (t, *J* = 7.5 Hz, 1H), 7.06 (d, *J* = 6.5 Hz, 1H), 6.81 (t, *J* = 6.5 Hz, 1H), 2.55 (s, 3H).

**<sup>13</sup>C NMR** (125 MHz, DMSO-*d*<sub>6</sub>): δ 163.6, 145.3, 143.5, 142.1, 138.2, 135.9, 135.0, 132.5, 131.3, 129.9, 126.0, 125.9, 124.6, 123.3, 120.5, 118.4, 112.2, 111.5, 109.2, 16.7.

**HRMS** (ESI): *m/z* [M+H]<sup>+</sup> calcd for C<sub>22</sub>H<sub>17</sub>N<sub>4</sub>O<sup>+</sup> 353.1397, found 353.1403.

### 4-Chloro-*N*-(4-(8-methylimidazo[1,2-*a*]pyridin-2-yl)phenyl)benzamide (S23)

Following general procedure C using **S41** (44.7 mg, 0.2 mmol), 4-chlorobenzoyl chloride (26 μL, 0.2 mmol) and 60% NaH (12 mg, 0.3 mmol), the title compound **S23** (72 mg, 0.20 mmol) was obtained in 99% yield.

**<sup>1</sup>H NMR** (500 MHz, DMSO-*d*<sub>6</sub>): δ 10.41 (s, 1H), 8.38 (d, *J* = 6.5 Hz, 1H), 8.34 (s, 1H), 8.02 (d, *J* = 8.5 Hz, 2H), 7.98 (d, *J* = 8.5 Hz, 2H), 7.87 (d, *J* = 8.5 Hz, 2H), 7.63 (d, *J* = 8.5 Hz, 2H), 7.05 (d, *J* = 7.0 Hz, 1H), 6.80 (t, *J* = 7.0 Hz, 1H), 2.54 (s, 3H).

**<sup>13</sup>C NMR** (125 MHz, DMSO-*d*<sub>6</sub>): δ 164.4, 145.3, 143.6, 140.6, 138.4, 136.4, 133.6, 129.6, 128.5, 126.0, 125.8, 124.5, 123.3, 120.5, 112.1, 109.1, 16.7.

**HRMS** (ESI): *m/z* [M+H]<sup>+</sup> calcd for C<sub>21</sub>H<sub>17</sub>ClN<sub>3</sub>O<sup>+</sup> 362.1055, found 362.1061.

### 3-Chloro-*N*-(4-(8-methylimidazo[1,2-*a*]pyridin-2-yl)phenyl)benzamide (S24)

Following general procedure C using **S41** (44.7 mg, 0.2 mmol), 3-chlorobenzoyl chloride (26 μL, 0.2 mmol) and 60% NaH (12 mg, 0.3 mmol), the title compound **S24** (47 mg, 0.20 mmol) was obtained in 65% yield.

**<sup>1</sup>H NMR** (500 MHz, DMSO-*d*<sub>6</sub>): δ 10.44 (s, 1H), 8.38 (d, *J* = 6.5 Hz, 1H), 8.35 (s, 1H), 8.05 (s, 1H), 7.98 (d, *J* = 8.5 Hz, 2H), 7.95 (d, *J* = 8.0 Hz, 1H), 7.87 (d, *J* = 8.5 Hz, 2H), 7.69 (d, *J* = 8.0 Hz, 1H),

7.60 (t,  $J$  = 8.0 Hz, 1H), 7.05 (d,  $J$  = 7.0 Hz, 1H), 6.80 (t,  $J$  = 7.0 Hz, 1H), 2.55 (s, 3H).

**$^{13}\text{C}$  NMR** (125 MHz,  $\text{DMSO-}d_6$ ):  $\delta$  164.0, 145.3, 143.6, 138.3, 136.9, 133.2, 131.4, 130.3, 129.7, 127.4, 126.5, 126.0, 125.9, 124.6, 123.3, 120.5, 112.1, 109.1, 16.7.

**HRMS** (ESI):  $m/z$   $[\text{M}+\text{H}]^+$  calcd for  $\text{C}_{21}\text{H}_{17}\text{ClN}_3\text{O}^+$  362.1055, found 362.1062.

#### **2-Chloro-*N*-(4-(8-methylimidazo[1,2-*a*]pyridin-2-yl)phenyl)benzamide (S25)**

Following general procedure C using **S41** (44.7 mg, 0.2 mmol), 2-chlorobenzoyl chloride (26  $\mu\text{L}$ , 0.2 mmol) and 60% NaH (12 mg, 0.3 mmol), the title compound **S25** (33 mg, 0.09 mmol) was obtained in 45% yield.

**$^1\text{H}$  NMR** (500 MHz,  $\text{DMSO-}d_6$ ):  $\delta$  10.59 (s, 1H), 8.37 (d,  $J$  = 6.5 Hz, 1H), 8.33 (s, 1H), 7.96 (d,  $J$  = 8.5 Hz, 2H), 7.80 (d,  $J$  = 8.5 Hz, 2H), 7.61 (d,  $J$  = 7.0 Hz, 1H), 7.58 (d,  $J$  = 8.0 Hz, 1H), 7.52 (t,  $J$  = 7.5 Hz, 1H), 7.47 (t,  $J$  = 7.5 Hz, 1H), 7.04 (d,  $J$  = 6.5 Hz, 1H), 6.79 (t,  $J$  = 6.5 Hz, 1H), 2.53 (s, 3H).

**$^{13}\text{C}$  NMR** (125 MHz,  $\text{DMSO-}d_6$ ):  $\delta$  164.9, 145.3, 143.5, 138.4, 127.0, 131.1, 129.9, 129.7, 129.02, 128.96, 127.3, 126.01, 125.97, 124.5, 123.3, 119.7, 112.1, 109.1, 16.7.

**HRMS** (ESI):  $m/z$   $[\text{M}+\text{H}]^+$  calcd for  $\text{C}_{21}\text{H}_{17}\text{ClN}_3\text{O}^+$  362.1055, found 362.1067.

#### **4-Nitro-*N*-(4-(8-methylimidazo[1,2-*a*]pyridin-2-yl)phenyl)benzamide (S26)**

Following general procedure C using **S41** (89 mg, 0.4 mmol), 4-nitrobenzoyl chloride (74 mg, 0.4 mmol) and 60% NaH (24 mg, 0.6 mmol), the title compound **S26** (108 mg, 0.29 mmol) was obtained in 73% yield.

**$^1\text{H}$  NMR** (500 MHz,  $\text{DMSO-}d_6$ ):  $\delta$  10.65 (s, 1H), 8.40–8.33 (m, 4H), 8.21 (d,  $J$  = 8.5 Hz, 2H), 7.99 (d,  $J$  = 8.5 Hz, 1H), 7.88 (d,  $J$  = 8.5 Hz, 1H), 7.04 (d,  $J$  = 6.5 Hz, 1H), 6.79 (t,  $J$  = 6.5 Hz, 1H), 2.53 (s, 3H).

**$^{13}\text{C}$  NMR** (125 MHz,  $\text{DMSO-}d_6$ ):  $\delta$  165.2, 152.2, 145.2, 143.8, 139.3, 129.4, 128.7, 126.0, 125.7, 124.5, 123.2, 121.0, 120.2, 112.6, 112.1, 108.9, 16.7.

**HRMS** (ESI):  $m/z$   $[\text{M}+\text{H}]^+$  calcd for  $\text{C}_{21}\text{H}_{17}\text{N}_4\text{O}_3^+$  373.1295, found 373.1301.

#### **4-Azido-*N*-(4-(8-methylimidazo[1,2-*a*]pyridin-2-yl)phenyl)benzamide (S28)**

Following general procedure C using **S41** (250 mg, 1.12 mmol), 4-azidobenzoyl chloride (203 g, 1.12 mmol) and 60% NaH (88 mg, 2.2 mmol), the title compound **S28** (333 mg, 0.90 mmol) was obtained in 80% yield.

**$^1\text{H}$  NMR** (500 MHz,  $\text{DMSO-}d_6$ ):  $\delta$  10.44 (s, 1H), 8.50 (d,  $J$  = 6.5 Hz, 1H), 8.50 (s, 1H), 8.06 (d,  $J$  = 8.5 Hz, 2H), 8.00 (d,  $J$  = 9.0 Hz, 2H), 7.93 (d,  $J$  = 8.5 Hz, 2H), 7.33 (br s, 1H), 7.28 (d,  $J$  = 8.5 Hz, 2H), 7.05 (t,  $J$  = 6.5 Hz, 1H), 2.60 (s, 3H).

**$^{13}\text{C}$  NMR** (125 MHz,  $\text{DMSO-}d_6$ ):  $\delta$  164.5, 144.4 (br), 142.8, 142.2 (br), 139.0 (br), 131.2, 129.7, 126.1, 125.4 (br), 124.9 (br), 120.5, 119.0, 113.0 (br), 109.4, 16.6 (two aromatic carbons were not

found, likely due to peak broadening).

**HRMS** (ESI):  $m/z$   $[M+H]^+$  calcd for  $C_{21}H_{17}N_6O^+$  369.1458, found 369.1462.

### **3-Nitro-*N*-(4-(8-methylimidazo[1,2-*a*]pyridin-2-yl)phenyl)benzamide (S29)**

Following general procedure C using **S41** (44.7 mg, 0.2 mmol), 3-nitrobenzoyl chloride (26  $\mu$ L, 0.2 mmol) and 60% NaH (12 mg, 0.3 mmol), the title compound **S29** (47 mg, 0.20 mmol) was obtained in 65% yield.

**$^1H$  NMR** (500 MHz, DMSO- $d_6$ ):  $\delta$  10.68 (s, 1H), 8.82 (t,  $J$  = 1.5 Hz, 1H), 8.47–8.41 (m, 2H), 8.38 (d,  $J$  = 6.5 Hz, 1H), 8.35 (s, 1H), 8.00 (d,  $J$  = 8.5 Hz, 2H), 7.89 (d,  $J$  = 8.5 Hz, 2H), 7.86 (t,  $J$  = 8.0 Hz, 1H), 7.06 (d,  $J$  = 6.5 Hz, 1H), 6.81 (t,  $J$  = 6.5 Hz, 1H), 2.54 (s, 3H).

**$^{13}C$  NMR** (125 MHz, DMSO- $d_6$ ):  $\delta$  163.3, 147.8, 145.2, 143.3, 138.2, 136.3, 134.2, 132.6, 130.2, 129.7, 126.2, 125.9, 124.6, 123.6, 122.4, 120.7, 112.3, 109.3, 16.7.

**HRMS** (ESI):  $m/z$   $[M+H]^+$  calcd for  $C_{21}H_{17}N_4O_3^+$  373.1295, found 373.1308.

### ***N*-(4-(8-Methylimidazo[1,2-*a*]pyridin-2-yl)phenyl)-4-(trifluoromethyl)benzamide (S34)**

Following general procedure C using **S41** (44.7 mg, 0.2 mmol), 4-(trifluoromethyl)benzoyl chloride (0.95 g, 5.74 mmol) and 60% NaH (12 mg, 0.3 mmol), the title compound **S34** (52 mg, 0.13 mmol) was obtained in 65% yield.

**$^1H$  NMR** (500 MHz, DMSO- $d_6$ ):  $\delta$  10.57 (s, 1H), 8.37 (d,  $J$  = 7.0 Hz, 1H), 8.34 (s, 1H), 8.18 (d,  $J$  = 8.5 Hz, 2H), 7.99 (d,  $J$  = 8.5 Hz, 2H), 7.92 (d,  $J$  = 8.5 Hz, 2H), 7.88 (d,  $J$  = 8.5 Hz, 2H), 7.04 (d,  $J$  = 6.5 Hz, 1H), 6.79 (t,  $J$  = 6.5 Hz, 1H), 2.54 (s, 3H).

**$^{13}C$  NMR** (125 MHz, DMSO- $d_6$ ):  $\delta$  164.3, 145.3, 143.6, 138.8, 138.3, 131.4 (q,  $^2J_{(C-F)}$  = 31.6 Hz), 129.8, 128.6, 126.0, 125.9, 125.4 (q,  $^3J_{(C-F)}$  = 3.8 Hz), 124.5, 123.9 (q,  $^1J_{(C-F)}$  = 270.8 Hz), 123.3, 120.5, 112.1, 109.2, 16.7.

**HRMS** (ESI):  $m/z$   $[M+H]^+$  calcd for  $C_{22}H_{17}F_3N_3O^+$  396.1318, found 396.1331.

## **Scheme S2**

### **7-Methyl-2-(4-nitrophenyl)imidazo[1,2-*a*]pyridine (S45)**

Following general procedure A using **S38** (1.0 g, 8.2 mmol), **S42** (443 mg, 4.1 mmol), and Na<sub>2</sub>CO<sub>3</sub> (318 mg, 3.0 mmol), the title compound **S45** (468 mg, 1.8 mmol) was obtained in 92% yield.

<sup>1</sup>H NMR (400 MHz, CDCl<sub>3</sub>): δ 8.26 (d, 2H), 8.07 (d, 2H), 8.02 (d, 1H), 7.90 (d, 1H), 7.39 (s, 1H), 6.66 (d, 1H), 2.42 (s, 3H).

LRMS (ESI): *m/z* [M+H]<sup>+</sup> calcd. for C<sub>14</sub>H<sub>12</sub>N<sub>3</sub>O<sub>2</sub><sup>+</sup> 254, found 254.

### **6-Methyl-2-(4-nitrophenyl)imidazo[1,2-*a*]pyridine (S46)**

Following general procedure A using **S38** (500 mg, 2.0 mmol), **S43** (443 mg, 4.1 mmol), and Na<sub>2</sub>CO<sub>3</sub> (318 mg, 3.0 mmol), the title compound **S46** (452 mg, 1.8 mmol) was obtained in 89% yield.

<sup>1</sup>H NMR (500 MHz, CDCl<sub>3</sub>): δ 8.27 (d, 2H), 8.08 (d, 2H), 7.93 (s, 1H), 7.90 (s, 1H), 7.54 (d, 1H), 7.08 (d, 1H), 2.34 (s, 3H).

LRMS (ESI): *m/z* [M+H]<sup>+</sup> calcd. for C<sub>14</sub>H<sub>12</sub>N<sub>3</sub>O<sub>2</sub><sup>+</sup> 254, found 254.

### **5-Methyl-2-(4-nitrophenyl)imidazo[1,2-*a*]pyridine (S47)**

Following general procedure A using **S38** (1.0 g, 8.2 mmol), **S44** (887 mg, 8.2 mmol), and Na<sub>2</sub>CO<sub>3</sub> (318 mg, 3.0 mmol), the title compound **S47** (441 mg, 1.7 mmol) was obtained in 42% yield.

<sup>1</sup>H NMR (500 MHz, CDCl<sub>3</sub>): δ 8.31 (d, 2H), 8.15 (d, 2H), 7.89 (s, 1H), 7.57 (d, 1H), 7.23 (t, 1H), 6.68 (d, 1H), 2.64 (s, 3H).

LRMS (ESI): *m/z* [M+H]<sup>+</sup> calcd. for C<sub>14</sub>H<sub>12</sub>N<sub>3</sub>O<sub>2</sub><sup>+</sup> 254, found 254.

### **7-Methyl-2-(4-aminophenyl)imidazo[1,2-*a*]pyridine (S48)**

Following general procedure B using **S45** (300 mg, 1.2 mmol), 1,4-cyclohexadiene (1.1 mL, 12 mmol), and 10% Pd/C (30 mg), the title compound **S48** (236 mg, 1.1 mmol) was obtained in 89% yield.

<sup>1</sup>H NMR (400 MHz, DMSO-*d*<sub>6</sub>): δ 8.28 (d, 1H), 7.98 (s, 1H), 7.55 (d, 2H), 7.21 (s, 1H), 6.62 (d, 1H), 6.5 (d, 2H), 6.55 (bs, 2H), 2.28 (s, 3H).

LRMS (ESI): *m/z* [M+H]<sup>+</sup> calcd. for C<sub>14</sub>H<sub>14</sub>N<sub>3</sub><sup>+</sup> 224, found 224.

### **6-Methyl-2-(4-aminophenyl)imidazo[1,2-*a*]pyridine (S49)**

Following general procedure B using **S46** (100 mg, 0.4 mmol), 1,4-cyclohexadiene (0.36 mL, 4 mmol) and 10% Pd/C (10 mg), the title compound **S49** (68 mg, 0.30 mmol) was obtained in 77% yield.

<sup>1</sup>H NMR (400 MHz, CDCl<sub>3</sub>): δ 7.92 (d, 1H), 7.75 (d, 2H), 7.68 (s, 1H), 6.90 (d, 1H), 6.73 (d, 2H), 6.63 (d, 1H), 2.64 (s, 3H).

LRMS (ESI): *m/z* [M+H]<sup>+</sup> calcd. for C<sub>14</sub>H<sub>14</sub>N<sub>3</sub><sup>+</sup> 224, found 224.

### 5-Methyl-2-(4-aminophenyl)imidazo[1,2-*a*]pyridine (S50)

Following general procedure B using **S47** (500 mg, 2.0 mmol), 1,4-cyclohexadiene (1.8 mL, 20 mmol) and 10% Pd/C (50 mg), the title compound **S50** (251 mg, 1.1 mmol) was obtained in 57% yield.

**<sup>1</sup>H NMR** (500 MHz, CDCl<sub>3</sub>): δ 7.80 (d, 2H), 7.62 (d, 1H), 7.61 (s, 1H), 7.50 (t, 1H), 6.75 (d, 2H), 6.59 (d, 1H), 3.75 (bs, 2H), 2.59 (s, 3H).

**LRMS** (ESI): *m/z* [M+H]<sup>+</sup> calcd. for C<sub>14</sub>H<sub>14</sub>N<sub>3</sub><sup>+</sup> 224, found 224.

### 3,4-Difluoro-*N*-(4-(7-methylimidazo[1,2-*a*]pyridin-2-yl)phenyl)benzamide (S1)

Following general procedure C using **S48** (50 mg, 0.22 mmol), 3,4-difluorobenzoyl chloride (28 μL, 0.24 mmol) and 60% NaH (11 mg, 0.27 mmol), the title compound **S1** (29 mg, 0.08 mmol) was obtained in 35% yield.

**<sup>1</sup>H NMR** (500 MHz, DMSO-*d*<sub>6</sub>): δ 10.39 (s, 1H), 8.40 (d, *J* = 7.0 Hz, 1H), 8.26 (s, 1H), 8.09–8.04 (m, 1H), 7.95 (d, *J* = 9.0 Hz, 2H), 7.92–7.87 (m, 1H), 7.84 (d, *J* = 9.0 Hz, 2H), 7.67–7.61 (m, 1H), 7.34 (s, 1H), 6.74 (dd, *J* = 7.0, 1.5 Hz, 1H), 2.36 (s, 3H).

**<sup>13</sup>C NMR** (125 MHz, DMSO-*d*<sub>6</sub>): δ 163.1, 151.5 (dd, <sup>1</sup>*J*<sub>(C-F)</sub> = 249.5, <sup>2</sup>*J*<sub>(C-F)</sub> = 13.0 Hz), 149.1 (dd, <sup>1</sup>*J*<sub>(C-F)</sub> = 245.4, <sup>2</sup>*J*<sub>(C-F)</sub> = 13.0 Hz), 145.2, 143.9, 138.2, 135.2, 132.3, 129.8, 126.0, 125.8, 125.4–125.1 (m), 120.5, 117.7 (<sup>2</sup>*J*<sub>(C-F)</sub> = 17.4 Hz), 117.2 (<sup>2</sup>*J*<sub>(C-F)</sub> = 18.3 Hz), 114.8, 114.6, 108.1, 20.8.

**HRMS** (ESI): *m/z* [M+H]<sup>+</sup> calcd for C<sub>21</sub>H<sub>16</sub>F<sub>2</sub>N<sub>3</sub>O<sup>+</sup> 364.1256, found 364.1269.

### 3,4-Difluoro-*N*-(4-(6-methylimidazo[1,2-*a*]pyridin-2-yl)phenyl)benzamide (S2)

Following general procedure C using **S49** (29 mg, 0.13 mmol), 3,4-difluorobenzoyl chloride (17 μL, 0.14 mmol) and 60% NaH (8 mg, 0.2 mmol), the title compound **S2** (31 mg, 0.09 mmol) was obtained in 65% yield.

**<sup>1</sup>H NMR** (500 MHz, DMSO-*d*<sub>6</sub>): δ 10.65 (s, 1H), 8.35 (br s, 1H), 8.30 (s, 1H), 8.21–8.15 (m, 1H), 7.99–7.95 (m, 1H), 7.94 (d, *J* = 9.0 Hz, 2H), 7.91 (d, *J* = 9.0 Hz, 2H), 7.63 (dt, *J* = 10.0, 8.5 Hz, 1H), 7.48 (d, *J* = 9.5 Hz, 1H), 7.11 (dd, *J* = 10.0, 1.5 Hz, 1H), 2.29 (s, 3H).

**<sup>13</sup>C NMR** (125 MHz, DMSO-*d*<sub>6</sub>): δ 163.2, 151.6 (dd, <sup>1</sup>*J*<sub>(C-F)</sub> = 248.0, <sup>2</sup>*J*<sub>(C-F)</sub> = 15.0 Hz), 149.1 (dd, <sup>1</sup>*J*<sub>(C-F)</sub> = 244.9, <sup>2</sup>*J*<sub>(C-F)</sub> = 14.9 Hz), 144.0, 143.8, 142.2, 138.4, 132.2, 129.7, 127.8, 125.7, 125.6–125.4 (m), 124.2, 121.4, 117.6 (<sup>2</sup>*J*<sub>(C-F)</sub> = 17.5 Hz), 117.4 (<sup>2</sup>*J*<sub>(C-F)</sub> = 17.1 Hz), 115.9, 108.4, 17.5.

**HRMS** (ESI): *m/z* [M+H]<sup>+</sup> calcd for C<sub>21</sub>H<sub>16</sub>F<sub>2</sub>N<sub>3</sub>O<sup>+</sup> 364.1256, found 364.1261.

### 3,4-Difluoro-*N*-(4-(5-methylimidazo[1,2-*a*]pyridin-2-yl)phenyl)benzamide (S3)

Following general procedure C using **S50** (50 mg, 0.22 mmol), 3,4-difluorobenzoyl chloride (29 mg, 0.24 mmol) and 60% NaH (14 mg, 0.35 mmol), the title compound **S3** (50 mg, 0.14 mmol) was obtained in 61% yield.

**$^1\text{H}$  NMR** (500 MHz, DMSO- $d_6$ ):  $\delta$  10.40 (s, 1H), 8.32 (s, 1H), 8.10–8.03 (m, 3H), 7.92–7.88 (m, 1H), 7.86 (d,  $J$  = 8.5 Hz, 2H), 7.68–7.62 (m, 1H), 7.48 (d,  $J$  = 9.0 Hz, 1H), 7.22 (dd,  $J$  = 9.0, 6.5 Hz, 1H), 6.78 (d,  $J$  = 7.0 Hz, 1H), 2.65 (s, 3H).

**$^{13}\text{C}$  NMR** (125 MHz, DMSO- $d_6$ ):  $\delta$  163.2, 151.5 (d,  $^1J_{\text{C-F}}$  = 249.3,  $^2J_{\text{C-F}}$  = 12.8 Hz), 149.1 (d,  $^1J_{\text{C-F}}$  = 245.3,  $^2J_{\text{C-F}}$  = 13.0 Hz), 145.2, 144.2, 138.3, 135.2, 132.3, 129.8, 125.9, 125.3, 124.9, 120.5, 117.7 (d,  $^2J_{\text{C-F}}$  = 17.6 Hz), 117.2 (d,  $^2J_{\text{C-F}}$  = 18.5 Hz), 113.9, 111.2, 106.5, 18.3.

**HRMS** (ESI):  $m/z$   $[\text{M}+\text{H}]^+$  calcd for  $\text{C}_{21}\text{H}_{16}\text{F}_2\text{N}_3\text{O}^+$  364.1256, found 364.1266.



### **Scheme S3**

#### **2-(3-Nitrophenyl)imidazo[1,2-*a*]pyridine (S53)**

Following general procedure A using **S51** (1.0 g, 8.2 mmol), **S52** (386 mg, 4.1 mmol), and Na<sub>2</sub>CO<sub>3</sub> (318 mg, 3.0 mmol), the title compound **S53** (900 mg, 3.8 mmol) was obtained in 92% yield.

**<sup>1</sup>H NMR** (400 MHz, CDCl<sub>3</sub>): δ 8.73 (s, 1H), 8.34 (d, 2H), 8.14 (d, 2H), 7.95 (s, 1H), 7.70–7.55 (m, 2H), 7.22 (dd, 1H), 6.82 (dd, 1H).

**LRMS** (ESI): *m/z* [M+H]<sup>+</sup> calcd. for C<sub>13</sub>H<sub>10</sub>N<sub>3</sub>O<sub>2</sub><sup>+</sup> 240, found 240.

#### **2-(3-Aminophenyl)imidazo[1,2-*a*]pyridine (S54)**

Following general procedure B using **S53** (500 mg, 2.1 mmol), 1,4-cyclohexadiene (2.0 mL, 21 mmol) and 10% Pd/C (50 mg), the title compound **S54** (313 mg, 1.5 mmol) was obtained in 71% yield.

**<sup>1</sup>H NMR** (400 MHz, CDCl<sub>3</sub>): δ 8.10 (d, 1H), 7.83 (s, 1H), 7.61 (d, 1H), 7.39 (s, 1H), 7.28 (d, 1H), 7.22 (dd, 1H), 7.16 (dd, 1H), 6.76 (d, 1H), 6.66 (d, 1H), 3.74 (bs, 2H).

**LRMS** (ESI): *m/z* [M+H]<sup>+</sup> calcd. for C<sub>13</sub>H<sub>12</sub>N<sub>3</sub><sup>+</sup> 210, found 210.

#### **3,4-Difluoro-N-(3-(imidazo[1,2-*a*]pyridin-2-yl)phenyl)benzamide (S4)**

Following general procedure C using **S54** (44.7 mg, 0.22 mmol), 3,4-difluorobenzoyl chloride (26 μL, 0.22 mmol) and 60% NaH (10 mg, 0.24 mmol), the title compound **S4** (72 mg, 0.20 mmol) was obtained in 86% yield.

**<sup>1</sup>H NMR** (500 MHz, DMSO-*d*<sub>6</sub>): δ 10.42 (s, 1H), 8.56 (d, *J* = 7.0 Hz, 1H), 8.46 (t, *J* = 1.5 Hz, 1H), 8.39 (s, 1H), 8.14–8.08 (m, 1H), 7.96–7.91 (m, 1H), 7.79–7.75 (m, 1H), 7.73–7.57 (m, 3H), 7.44 (t, *J* = 8.0 Hz, 1H), 7.29–7.24 (m, 1H), 6.91 (td, *J* = 6.5, 1.0 Hz, 1H).

**<sup>13</sup>C NMR** (125 MHz, DMSO-*d*<sub>6</sub>): δ 163.2, 151.6 (d, <sup>1</sup>*J*<sub>(C-F)</sub> = 249.9, <sup>2</sup>*J*<sub>(C-F)</sub> = 12.5 Hz), 149.2 (d, <sup>1</sup>*J*<sub>(C-F)</sub> = 245.3, <sup>2</sup>*J*<sub>(C-F)</sub> = 13.3 Hz), 144.8, 144.2, 139.3, 134.4, 132.2, 129.0, 127.0, 125.3 (m), 125.0, 121.2, 119.7, 117.7, 117.6 (d, <sup>2</sup>*J*<sub>(C-F)</sub> = 16.3 Hz), 117.2 (d, <sup>2</sup>*J*<sub>(C-F)</sub> = 18.4 Hz), 116.6, 112.3, 109.2.

**HRMS** (ESI): *m/z* [M+H]<sup>+</sup> calcd for C<sub>20</sub>H<sub>14</sub>F<sub>2</sub>N<sub>3</sub>O<sup>+</sup> 350.1099, found 350.1120.

#### **Scheme S4**

##### **2-(4-Nitrophenyl)imidazo[1,2-*a*]pyridine (S55)**

Following general procedure A using **S38** (1.0 g, 8.2 mmol), **S52** (772 mg, 8.2 mmol), and Na<sub>2</sub>CO<sub>3</sub> (318 mg, 3.0 mmol), the title compound **S55** (889 mg, 3.7 mmol) was obtained in 90% yield.

**<sup>1</sup>H NMR** (400 MHz, DMSO-*d*<sub>6</sub>): δ 8.62 (s, 1H), 8.54 (d, *J* = 7.0 Hz, 1H), 8.27 (d, *J* = 7.0 Hz, 2H), 8.20 (d, *J* = 7.0 Hz, 2H), 7.59 (d, *J* = 9.0 Hz, 1H), 7.30–7.26 (m, 1H), 6.95–6.90 (m, 1H).

**LRMS** (ESI): *m/z* [M+H]<sup>+</sup> calcd. for C<sub>13</sub>H<sub>10</sub>N<sub>3</sub>O<sub>2</sub><sup>+</sup> 240, found 240.

##### **2-(4-Aminophenyl)imidazo[1,2-*a*]pyridine (S56)**

Following general procedure B using **S55** (500 mg, 2.1 mmol), 1,4-cyclohexadiene (2.0 mL, 21 mmol) and 10% Pd/C (50 mg), the title compound **S56** (372 mg, 1.8 mmol) was obtained in 85% yield.

**<sup>1</sup>H NMR** (500 MHz, DMSO-*d*<sub>6</sub>): δ 8.41 (d, 1H), 8.07 (s, 1H), 7.59 (d, 2H), 7.12 (dd, 1H), 6.78 (dd, 1H), 6.57 (d, 2H), 5.24 (bs, 2H).

**LRMS** (ESI): *m/z* [M+H]<sup>+</sup> calcd. for C<sub>13</sub>H<sub>12</sub>N<sub>3</sub><sup>+</sup> 210, found 210.

##### **3,4-Difluoro-*N*-(4-(8-methylimidazo[1,2-*a*]pyridin-2-yl)phenyl)benzamide (S5)**

Following general procedure C using **S56** (209 mg, 1.0 mmol), 3,4-difluorobenzoyl chloride (17 μL, 0.38 mmol) and 60% NaH (18 mg, 1.0 mmol), the title compound **S5** (261 mg, 0.74 mmol) was obtained in 74% yield.

**<sup>1</sup>H NMR** (500 MHz, DMSO-*d*<sub>6</sub>): δ 10.45 (s, 1H), 8.54 (d, *J* = 6.5 Hz, 1H), 8.37 (s, 1H), 8.12–8.06 (m, 1H), 7.98 (d, *J* = 9.0 Hz, 2H), 7.94–7.84 (m, 3H), 7.68–7.61 (m, 1H), 7.57 (d, *J* = 9.0 Hz, 1H), 7.26–7.23 (m, 1H), 6.90 (td, *J* = 6.5, 1.0 Hz, 1H).

**<sup>13</sup>C NMR** (125 MHz, DMSO-*d*<sub>6</sub>): δ 163.2, 151.5 (d, <sup>1</sup>*J*<sub>(C-F)</sub> = 249.5, <sup>2</sup>*J*<sub>(C-F)</sub> = 12.4 Hz), 149.1 (d, <sup>1</sup>*J*<sub>(C-F)</sub> = 244.8, <sup>2</sup>*J*<sub>(C-F)</sub> = 13.3 Hz), 144.8, 144.1, 138.4, 132.2 (m), 129.6, 126.8, 125.9, 125.3 (m), 124.9, 120.6, 117.6 (d, <sup>2</sup>*J*<sub>(C-F)</sub> = 17.3 Hz), 117.2 (d, <sup>2</sup>*J*<sub>(C-F)</sub> = 18.3 Hz), 116.5, 112.2, 108.7.

**HRMS** (ESI): *m/z* [M+H]<sup>+</sup> calcd for C<sub>20</sub>H<sub>14</sub>F<sub>2</sub>N<sub>3</sub>O<sup>+</sup> 350.1099, found 350.1116.

### **Scheme S5**

#### **3,4-Difluoro-*N*-methyl-*N*-(4-(8-methylimidazo[1,2-*a*]pyridin-2-yl)phenyl)benzamide (S6)**

A solution of **2** (82 mg, 0.23 mmol), Mel (21  $\mu$ L, 0.34 mmol), and 60% NaH (11 mg, 0.27 mmol) in DMF was stirred at r.t. for 1 h. The reaction was quenched by addition of sat.  $\text{NH}_4\text{Cl}$ . The mixture was extracted with ethyl acetate and the organic phase was washed with water and brine, dried over  $\text{Na}_2\text{SO}_4$ , and concentrated *in vacuo*. The resulting material was washed with 50% ethyl acetate and water, and dried *in vacuo*. The crude material was purified by column chromatography eluting with a gradient from 30% ethyl acetate in hexane to 50% ethyl acetate in hexane to give the title compound **S6** (68 mg, 0.18 mmol) in 80% yield.

**$^1\text{H}$  NMR** (500 MHz,  $\text{DMSO-}d_6$ ):  $\delta$  8.36–8.32 (m, 2H), 7.88 (d,  $J = 8.5$  Hz, 1H), 7.42–7.36 (m, 1H), 7.34–7.22 (m, 3H), 7.15–7.10 (m, 1H), 7.04 (d,  $J = 6.5$  Hz, 1H), 6.79 (t,  $J = 6.5$  Hz, 1H), 3.40 (s, 3H), 2.50 (s, 3H).

**$^{13}\text{C}$  NMR** (125 MHz,  $\text{DMSO-}d_6$ ):  $\delta$  167.2, 149.7 (d,  $^1J_{\text{C-F}} = 247.8$ ,  $^2J_{\text{C-F}} = 12.4$  Hz), 148.5 (d,  $^1J_{\text{C-F}} = 245.3$ ,  $^2J_{\text{C-F}} = 12.5$  Hz), 145.3, 143.2, 142.7, 133.8 (m), 132.4, 127.3, 126.2, 126.1, 125.6 (m), 124.6, 123.5, 117.8 (d,  $^2J_{\text{C-F}} = 18.4$  Hz), 117.1 (d,  $^2J_{\text{C-F}} = 17.6$  Hz), 112.3, 109.9, 37.8, 16.6.

**HRMS** (ESI):  $m/z$   $[\text{M}+\text{H}]^+$  calcd for  $\text{C}_{22}\text{H}_{18}\text{F}_2\text{N}_3\text{O}^+$  378.1412, found 378.1422.

## **Scheme S6**

### **Methyl 4-(8-methylimidazo[1,2-*a*]pyridin-2-yl)benzoate (S58)**

Following general procedure A using **S57** (500 mg, 1.9 mmol), **S39** (266  $\mu$ L, 3.9 mmol), and  $\text{Na}_2\text{CO}_3$  (151 mg, 1.4 mmol), the title compound **S58** (447 mg, 1.7 mmol) was obtained in 87% yield.

**$^1\text{H}$  NMR** (400 MHz,  $\text{CDCl}_3$ ):  $\delta$  8.10 (d,  $J = 6.0$  Hz, 2H), 8.04 (d,  $J = 6.0$  Hz, 2H), 8.00 (d,  $J = 6.0$  Hz, 1H), 7.93 (s, 1H), 6.98 (d,  $J = 6.8$  Hz, 1H), 6.72 (t,  $J = 6.8$  Hz, 1H), 3.94 (s, 3H), 2.67 (s, 3H).

**LRMS** (ESI):  $m/z$   $[\text{M}+\text{H}]^+$  calcd. for  $\text{C}_{16}\text{H}_{15}\text{N}_2\text{O}_2^+$  267, found 267.

### **4-(8-Methylimidazo[1,2-*a*]pyridin-2-yl)benzoyl chloride (S59)**

A mixture of **S58** (89 mg, 0.33 mmol) and NaOH (16 mg, 0.40 mmol) in 20% aq. THF was stirred at r.t. for 24 h. The reaction mixture was diluted with water and extracted with  $\text{CHCl}_3$ . The organic phase was washed with water and brine, dried over  $\text{Na}_2\text{SO}_4$ , and concentrated *in vacuo*. The carboxylic acid was dissolved in thionyl chloride, and the mixture was refluxed for 7 h. The reaction mixture was poured into toluene and the mixture was concentrated *in vacuo*. The product was used in the next step without further purification.

### ***N*-(4-Fluorophenyl)-4-(8-methylimidazo[1,2-*a*]pyridin-2-yl)benzamide (S10)**

Following general procedure C using 4-fluoroaniline (31  $\mu$ L, 0.32 mmol), **S59** (87 mg, 0.32 mmol), and 60% NaH (31 mg, 0.77 mmol), the title compound **S10** (103 mg, 0.29 mmol) was obtained in 50% yield.

**$^1\text{H}$  NMR** (500 MHz,  $\text{DMSO}-d_6$ ):  $\delta$  10.39 (s, 1H), 8.29–8.22 (m, 3H), 8.10 (d,  $J = 8.5$  Hz, 2H), 7.84–7.80 (m, 3H), 7.26–7.18 (m, 3H), 7.04 (t,  $J = 7.0$  Hz, 1H), 2.57 (s, 3H).

**$^{13}\text{C}$  NMR** (125 MHz,  $\text{DMSO}-d_6$ ):  $\delta$  165.0, 158.4 (d,  $^1J_{\text{C-F}} = 238.9$  Hz), 143.6, 137.0, 135.5, 125.4, 134.1, 128.1, 126.8, 126.7, 124.6, 122.2 (d,  $^3J_{\text{C-F}} = 7.6$  Hz), 121.4, 115.2 (d,  $^2J_{\text{C-F}} = 22.0$  Hz), 113.8, 109.1, 16.0.

**HRMS** (ESI):  $m/z$   $[\text{M}+\text{H}]^+$  calcd for  $\text{C}_{21}\text{H}_{17}\text{FN}_3\text{O}^+$  346.1350, found 346.1360.

## **Scheme S7**

### **4-Fluoro-*N*-(2-methyl-4-(8-methylimidazo[1,2-*a*]pyridin-2-yl)phenyl)benzamide (S11)**

Following general procedure C using **S60** (227 mg, 0.96 mmol), 4-fluorobenzoyl chloride (115  $\mu$ L, 0.96 mmol) and 60% NaH (80 mg, 2 mmol), the crude material was purified by column chromatography eluting with 50% ethyl acetate in hexane. The title compound **S11** (26 mg, 0.07 mmol) was obtained in 10% yield over 4 steps.

**<sup>1</sup>H NMR** (500 MHz, DMSO-*d*<sub>6</sub>):  $\delta$  9.94 (s, 1H), 8.41–8.32 (m, 2H), 8.12–8.04 (m, 2H), 7.90 (s, 1H), 7.81 (d, *J* = 8.0 Hz, 1H), 7.45–7.33 (m, 3H), 7.05 (d, *J* = 7.0 Hz, 1H), 6.80 (t, *J* = 7.0 Hz, 1H), 2.54 (s, 3H), 2.32 (s, 3H).

**<sup>13</sup>C NMR** (125 MHz, DMSO-*d*<sub>6</sub>):  $\delta$  164.3, 164.0 (d, <sup>1</sup>*J*<sub>(C-F)</sub> = 247.6 Hz), 145.3, 143.5, 135.7, 133.8, 131.8, 131.0, 130.3 (d, <sup>3</sup>*J*<sub>(C-F)</sub> = 9.0 Hz), 127.4, 126.8, 126.1, 124.6, 123.34, 123.29, 115.4 (d, <sup>2</sup>*J*<sub>(C-F)</sub> = 21.6 Hz), 112.2, 109.1, 18.0, 16.7.

**HRMS** (ESI): *m/z* [M+H]<sup>+</sup> calcd for C<sub>22</sub>H<sub>19</sub>FN<sub>3</sub>O<sup>+</sup> 360.1507, found 360.1518.

### **4-Fluoro-*N*-(3-methyl-4-(8-methylimidazo[1,2-*a*]pyridin-2-yl)phenyl)benzamide (S12)**

Following general procedure C using **S61** (128 mg, 0.53 mmol), 4-fluorobenzoyl chloride (64  $\mu$ L, 0.53 mmol) and 60% NaH (42 mg, 1.1 mmol), the crude material was purified by column chromatography eluting with a gradient from 2% methanol in CHCl<sub>3</sub> to 5% methanol in CHCl<sub>3</sub>. The title compound **S12** (103 mg, 0.29 mmol) was obtained in 5% yield over 4 steps.

**<sup>1</sup>H NMR** (500 MHz, DMSO-*d*<sub>6</sub>):  $\delta$  10.29 (s, 1H), 8.39 (d, *J* = 6.5 Hz, 1H), 8.15 (s, 1H), 8.10–8.04 (m, 2H), 7.97 (d, *J* = 8.0 Hz, 1H), 7.75–7.70 (m, 2H), 7.38 (t, *J* = 9.0 Hz, 2H), 7.05 (d, *J* = 7.0 Hz, 1H), 6.79 (t, *J* = 7.0 Hz, 1H), 2.56 (s, 3H), 2.53 (s, 3H).

**<sup>13</sup>C NMR** (125 MHz, DMSO-*d*<sub>6</sub>):  $\delta$  164.3, 164.0 (d, <sup>1</sup>*J*<sub>(C-F)</sub> = 247.6 Hz), 144.3, 143.1, 138.1, 135.4, 131.0 (d, <sup>4</sup>*J*<sub>(C-F)</sub> = 2.8 Hz), 130.3 (d, <sup>3</sup>*J*<sub>(C-F)</sub> = 9.0 Hz), 129.3, 129.0, 126.0, 124.5, 123.2, 122.5, 117.9, 115.4 (d, <sup>2</sup>*J*<sub>(C-F)</sub> = 21.6 Hz), 111.9, 111.6, 21.9, 16.7.

**HRMS** (ESI): *m/z* [M+H]<sup>+</sup> calcd for C<sub>22</sub>H<sub>19</sub>FN<sub>3</sub>O<sup>+</sup> 360.1507, found 360.1516.

## Scheme S8

### *N*-(4-(8-Methylimidazo[1,2-*a*]pyridin-2-yl)phenyl)picolinamide (S15)

Following general procedure D using **S41** (100 mg, 0.45 mmol), picolinic acid (111 mg, 0.90 mmol), EDCI (173 mg, 0.90 mmol), HOBt (138 mg, 0.90 mmol), and *i*Pr<sub>2</sub>NEt (177  $\mu$ L, 1.8 mmol), the title compound **S15** (80 mg, 0.24 mmol) was obtained in 50% yield.

**<sup>1</sup>H NMR** (500 MHz, DMSO-*d*<sub>6</sub>):  $\delta$  10.70 (s, 1H), 8.77–8.74 (m, 1H), 8.36 (d, *J* = 6.5 Hz, 1H), 8.34 (s, 1H), 8.18 (d, *J* = 8.0 Hz, 1H), 8.09 (td, *J* = 8.0, 2.0 Hz, 1H), 8.00 (d, *J* = 8.5 Hz, 2H), 7.97 (d, *J* = 8.5 Hz, 2H), 7.68 (ddd, *J* = 8.0, 5.0, 1.0 Hz, 1H), 7.04 (dt, *J* = 7.0, 1.0 Hz, 1H), 6.79 (t, *J* = 7.0 Hz, 1H), 2.53 (s, 3H).

**<sup>13</sup>C NMR** (125 MHz, DMSO-*d*<sub>6</sub>):  $\delta$  162.4, 149.9, 148.4, 145.3, 143.6, 138.2, 137.8, 129.8, 126.9, 126.0, 125.9, 124.5, 123.3, 122.4, 120.4, 112.1, 109.2, 16.7.

**HRMS** (ESI): *m/z* [M+H]<sup>+</sup> calcd for C<sub>20</sub>H<sub>17</sub>N<sub>4</sub>O<sup>+</sup> 329.1397, found 329.1402.

### 2-Nitro-*N*-(4-(8-methylimidazo[1,2-*a*]pyridin-2-yl)phenyl)benzamide (S31)

Following general procedure D using **S41** (152 mg, 0.68 mmol), 2-nitrobenzoic acid (137 mg, 0.82 mmol), EDCI (157 mg, 0.82 mmol), HOBt (111 mg, 0.82 mmol) and *i*Pr<sub>2</sub>NEt (289  $\mu$ L, 1.7 mmol), the title compound **S31** (191 mg, 0.51 mmol) was obtained in 75% yield.

**<sup>1</sup>H NMR** (500 MHz, DMSO-*d*<sub>6</sub>):  $\delta$  10.79 (s, 1H), 8.37 (d, *J* = 6.5 Hz, 1H), 8.34 (s, 1H), 8.16 (dd, *J* = 8.5, 1.0 Hz, 1H), 7.97 (d, *J* = 9.0 Hz, 2H), 7.88 (td, *J* = 7.5, 1.0 Hz, 1H), 7.82–7.74 (m, 4H), 7.04 (d, *J* = 7.0 Hz, 1H), 6.79 (t, *J* = 7.0 Hz, 1H), 2.53 (s, 3H).

**<sup>13</sup>C NMR** (125 MHz, DMSO-*d*<sub>6</sub>):  $\delta$  164.0, 146.5, 145.3, 143.5, 138.3, 134.1, 132.7, 131.0, 129.8, 129.3, 126.03, 126.02, 124.6, 124.3, 123.3, 119.8, 112.1, 109.2, 16.7.

**HRMS** (ESI): *m/z* [M+H]<sup>+</sup> calcd for C<sub>21</sub>H<sub>17</sub>N<sub>4</sub>O<sub>3</sub><sup>+</sup> 373.1295, found 373.1304.

### 5-Fluoro-*N*-(4-(8-methylimidazo[1,2-*a*]pyridin-2-yl)phenyl)picolinamide (S33)

Following general procedure D using **S41** (100 mg, 0.45 mmol), 5-fluoropicolinic acid (127 mg, 0.90 mmol), EDCI (173 mg, 0.90 mmol), HOBt (138 mg, 0.90 mmol) and *i*Pr<sub>2</sub>NEt (177  $\mu$ L, 1.8 mmol), the title compound **S33** (81 mg, 0.23 mmol) was obtained in 52% yield.

**<sup>1</sup>H NMR** (500 MHz, DMSO-*d*<sub>6</sub>):  $\delta$  10.66 (s, 1H), 8.74 (d, *J* = 3.0 Hz, 1H), 8.37 (d, *J* = 6.5 Hz, 1H), 8.34 (s, 1H), 8.25 (dd, *J* = 8.5, 4.5 Hz, 1H), 8.03–7.94 (m, 5H), 7.04 (d, *J* = 6.5 Hz, 1H), 6.79 (t, *J* = 6.5 Hz, 1H), 2.53 (s, 3H).

**<sup>13</sup>C NMR** (125 MHz, DMSO-*d*<sub>6</sub>):  $\delta$  161.9, 160.8 (d, <sup>1</sup>*J*<sub>(C-F)</sub> = 256.9 Hz), 146.7 (d, <sup>4</sup>*J*<sub>(C-F)</sub> = 3.5 Hz), 145.3, 143.6, 137.8, 136.8 (d, <sup>2</sup>*J*<sub>(C-F)</sub> = 25.0 Hz), 129.8, 126.0, 125.9, 124.9 (d, <sup>2</sup>*J*<sub>(C-F)</sub> = 18.6 Hz), 124.7 (d, <sup>3</sup>*J*<sub>(C-F)</sub> = 5.8 Hz), 124.5, 123.3, 120.5, 112.1, 109.2, 16.7.

**HRMS** (ESI): *m/z* [M+H]<sup>+</sup> calcd for C<sub>20</sub>H<sub>16</sub>FN<sub>4</sub>O<sup>+</sup> 347.1303, found 347.1313.

#### 5-Cyano-*N*-(4-(8-methylimidazo[1,2-*a*]pyridin-2-yl)phenyl)picolinamide (S35)

Following general procedure D using **S41** (100 mg, 0.45 mmol), 5-cyanopicolinic acid (133 mg, 0.90 mmol), EDCI (173 mg, 0.90 mmol), HOBT (138 mg, 0.90 mmol), and *i*Pr<sub>2</sub>NEt (177  $\mu$ L, 1.8 mmol), the title compound **S35** (114 mg, 0.32 mmol) was obtained in 72% yield.

**<sup>1</sup>H NMR** (500 MHz, DMSO-*d*<sub>6</sub>):  $\delta$  10.88 (s, 1H), 9.21 (dd, *J* = 2.0, 0.5 Hz, 1H), 8.60 (dd, *J* = 8.0, 2.0 Hz, 1H), 8.37 (d, *J* = 6.5 Hz, 1H), 8.35 (s, 1H), 8.31 (dd, *J* = 8.0, 0.5 Hz, 1H), 8.03–7.96 (m, 4H), 7.05 (d, *J* = 7.0 Hz, 1H), 6.79 (t, *J* = 7.0 Hz, 1H), 2.53 (s, 3H).

**<sup>13</sup>C NMR** (125 MHz, DMSO-*d*<sub>6</sub>):  $\delta$  161.2, 152.6, 151.5, 146.6, 142.2, 137.5, 128.0, 126.9, 126.0, 125.9, 124.6, 122.4, 120.7, 116.6, 113.6, 112.2, 111.6, 109.3, 16.7.

**HRMS** (ESI): *m/z* [M+H]<sup>+</sup> calcd for C<sub>21</sub>H<sub>16</sub>N<sub>5</sub>O<sup>+</sup> 354.1349, found 354.1366.

#### 5-Methyl-*N*-(4-(8-methylimidazo[1,2-*a*]pyridin-2-yl)phenyl)picolinamide (S36)

Following general procedure D using **S41** (100 mg, 0.45 mmol), 5-methylpicolinic acid (123 mg, 0.90 mmol), EDCI (173 mg, 0.90 mmol), HOBT (138 mg, 0.90 mmol) and *i*Pr<sub>2</sub>NEt (177  $\mu$ L, 1.8 mmol), the title compound **S36** (67 mg, 0.20 mmol) was obtained in 41% yield.

**<sup>1</sup>H NMR** (500 MHz, DMSO-*d*<sub>6</sub>):  $\delta$  10.64 (s, 1H), 8.59 (s, 1H), 8.37 (d, *J* = 7.0 Hz, 1H), 8.34 (s, 1H), 8.08 (d, *J* = 8.0 Hz, 1H), 7.99 (d, *J* = 9.0 Hz, 2H), 7.96 (d, *J* = 9.0 Hz, 2H), 7.89 (dd, *J* = 8.0, 1.5 Hz, 1H), 7.04 (dt, *J* = 6.5, 1.0 Hz, 1H), 6.79 (t, *J* = 6.5 Hz, 1H), 2.53 (s, 3H), 2.43 (s, 3H).

**<sup>13</sup>C NMR** (125 MHz, DMSO-*d*<sub>6</sub>):  $\delta$  162.5, 148.7, 147.5, 145.3, 143.6, 138.2, 137.9, 126.9, 129.6, 126.0, 125.9, 124.5, 123.3, 122.0, 120.3, 112.1, 109.1, 18.0, 16.7.

**HRMS** (ESI): *m/z* [M+H]<sup>+</sup> calcd for C<sub>21</sub>H<sub>19</sub>N<sub>4</sub>O<sup>+</sup> 343.1553; found 343.1566.

#### *N*-(4-(8-Methylimidazo[1,2-*a*]pyridin-2-yl)phenyl)pyrimidine-4-carboxamide (S37)

Following general procedure D using **S41** (100 mg, 0.45 mmol), pyrimidine-4-carboxylic acid (112 mg, 0.90 mmol), EDCI (173 mg, 0.90 mmol), HOBT (138 mg, 0.90 mmol) and *i*Pr<sub>2</sub>NEt (177  $\mu$ L, 1.8 mmol), the title compound **S37** (81 mg, 0.24 mmol) was obtained in 51% yield.

**<sup>1</sup>H NMR** (500 MHz, DMSO-*d*<sub>6</sub>):  $\delta$  10.89 (s, 1H), 9.43 (d, *J* = 1.0 Hz, 1H), 9.14 (d, *J* = 5.0 Hz, 1H), 8.36 (d, *J* = 6.5 Hz, 1H), 8.34 (s, 1H), 8.15 (dd, *J* = 5.0, 1.0 Hz, 1H), 8.02–7.96 (m, 4H), 7.04 (d, *J* = 6.5 Hz, 1H), 6.78 (t, *J* = 6.5 Hz, 1H), 2.53 (s, 3H).

**<sup>13</sup>C NMR** (125 MHz, DMSO-*d*<sub>6</sub>):  $\delta$  161.3, 159.9, 157.8, 156.7, 145.3, 143.5, 137.3, 130.3, 126.0, 125.9, 124.5, 123.3, 120.7, 118.9, 112.1, 109.3, 16.7.

**HRMS** (ESI): *m/z* [M+H]<sup>+</sup> calcd for C<sub>19</sub>H<sub>16</sub>N<sub>5</sub>O<sup>+</sup> 330.1349; found 330.1357.

## **Scheme S9**

### **2-(4-Nitrophenyl)imidazo[1,2-*a*]pyrimidine (S65)**

Following general procedure A using **S38** (100 mg, 0.82 mmol), **S62** (78 mg, 0.41 mmol) and Na<sub>2</sub>CO<sub>3</sub> (32 mg, 0.30 mmol), the title compound **S65** (73 mg, 0.30 mmol) was obtained in 74% yield.

<sup>1</sup>H NMR (400 MHz, CDCl<sub>3</sub>): δ 8.98 (dd, *J* = 6.9, 2.3 Hz, 1H), 8.60 (s, 1H), 8.57 (dd, *J* = 4.0, 2.3 Hz, 1H), 8.30 (d, *J* = 9.2 Hz, 2H), 8.25 (d, *J* = 9.2 Hz, 2H), 7.08 (dd, *J* = 6.9, 4.0 Hz, 1H).

LRMS (ESI): *m/z* [M+H]<sup>+</sup> calcd. for C<sub>12</sub>H<sub>9</sub>N<sub>4</sub>O<sub>2</sub><sup>+</sup> 241, found 241.

### **2-(4-Nitrophenyl)imidazo[1,2-*a*]pyrazine (S66)**

Following general procedure A using **S38** (100 mg, 0.82 mmol), **S63** (78 mg, 0.41 mmol) and Na<sub>2</sub>CO<sub>3</sub> (32 mg, 0.30 mmol), the title compound **S66** (56 mg, 0.23 mmol) was obtained in 56% yield.

<sup>1</sup>H NMR (400 MHz, DMSO-*d*<sub>6</sub>): δ 9.15 (d, *J* = 0.9 Hz, 1H), 8.84 (s, 1H), 8.64 (dd, *J* = 4.5, 1.4 Hz, 1H), 8.36 (d, *J* = 9.0 Hz, 2H), 8.31 (d, *J* = 9.0 Hz, 2H), 7.95 (d, *J* = 4.5 Hz, 1H).

### **2-(4-Nitrophenyl)imidazo[1,2-*b*]pyridazine (S67)**

Following general procedure A using **S38** (129 mg, 0.53 mmol), **S64** (50 mg, 0.53 mmol) and NaOAc (64 mg, 0.79 mmol), the title compound **S67** (50 mg, 0.21 mmol) was obtained in 40% yield.

<sup>1</sup>H NMR (500 MHz, DMSO-*d*<sub>6</sub>): δ 9.12 (s, 1H), 8.56 (dd, *J* = 4.6, 1.7 Hz, 1H), 8.33 (m, 4H), 8.18 (dd, *J* = 9.2, 1.2 Hz, 1H), 7.30 (dd, *J* = 9.2, 4.6 Hz, 1H).

LRMS (ESI): *m/z* [M+H]<sup>+</sup> calcd. for C<sub>12</sub>H<sub>9</sub>N<sub>4</sub>O<sub>2</sub><sup>+</sup> 241, found 241.

### **2-(4-Aminophenyl)imidazo[1,2-*a*]pyrimidine (S68)**

Following general procedure B using **S65** (20 mg, 0.085 mmol), 1,4-cyclohexadiene (79 μL, 0.85 mmol) and 10% Pd/C (2 mg), the title compound **S68** (6.5 mg, 0.031 mmol) was obtained in 36% yield.

<sup>1</sup>H NMR (500 MHz, CD<sub>3</sub>OD): δ 8.78 (dd, *J* = 6.9, 1.7 Hz, 1H), 8.47 (dd, *J* = 4.0, 2.3 Hz, 1H), 8.00 (s, 1H), 7.72 (d, *J* = 8.6 Hz, 2H), 7.00 (dd, *J* = 6.3, 4.6 Hz, 1H), 6.78 (d, *J* = 8.6 Hz, 2H), 2.64 (s, 3H).

LRMS (ESI): *m/z* [M+H]<sup>+</sup> calcd. for C<sub>12</sub>H<sub>11</sub>N<sub>4</sub><sup>+</sup> 211, found 211.

### **2-(4-Aminophenyl)imidazo[1,2-*a*]pyrazine (S69)**

Following general procedure B using **S66** (56 mg, 0.23 mmol), 1,4-cyclohexadiene (215 μL, 2.3 mmol) and 10% Pd/C (6 mg), the title compound **S69** (39 mg, 0.18 mmol) was obtained in 80% yield.

<sup>1</sup>H NMR (400 MHz, CD<sub>3</sub>OD): δ 8.90 (d, *J* = 0.9 Hz, 1H), 8.45 (d, *J* = 4.5, 1.4 Hz, 1H), 8.25 (s, 1H), 7.84 (d, *J* = 4.9 Hz, 2H), 7.73 (d, *J* = 8.5 Hz, 2H), 6.79 (d, *J* = 8.5 Hz, 2H).

LRMS (ESI): *m/z* [M+H]<sup>+</sup> calcd. for C<sub>12</sub>H<sub>11</sub>N<sub>4</sub><sup>+</sup> 211, found 211.



#### 2-(4-Aminophenyl)imidazo[1,2-*b*]pyridazine (S70)

Following general procedure B using **S67** (50 mg, 0.21 mmol), 1,4-cyclohexadiene (196  $\mu$ L, 2.1 mmol) and 10% Pd/C (10 mg), the title compound **S70** (41 mg, 0.19 mmol) was obtained in 92% yield.

**<sup>1</sup>H NMR** (400 MHz, CDCl<sub>3</sub>):  $\delta$  8.25 (dd,  $J$ =4.5, 1.8 Hz, 1H), 8.16 (s, 1H), 7.91 (dd,  $J$ =9.4, 0.9 Hz, 1H), 7.79 (d,  $J$ =8.5 Hz, 2H), 6.99 (dd,  $J$ =9.0, 4.5 Hz, 1H), 6.77 (d,  $J$ =9.0 Hz, 2H).

**LRMS** (ESI):  $m/z$  [M+H]<sup>+</sup> calcd. for C<sub>12</sub>H<sub>11</sub>N<sub>4</sub><sup>+</sup> 211, found 211.

#### 4-Fluoro-*N*-(4-(imidazo[1,2-*a*]pyrimidin-2-yl)phenyl)benzamide (S16)

Following general procedure C using **S68** (104 mg, 0.50 mmol), 4-fluorobenzoyl chloride (60  $\mu$ L, 0.50 mmol) and 60% NaH (28 mg, 0.70 mmol), the title compound **S16** (53 mg, 0.16 mmol) was obtained in 32% yield.

**<sup>1</sup>H NMR** (500 MHz, DMSO-*d*<sub>6</sub>):  $\delta$  10.40 (s, 1H), 8.96 (dd,  $J$ =6.5, 2.0 Hz, 1H), 8.51 (dd,  $J$ =4.0, 1.5 Hz, 1H), 8.33 (s, 1H), 8.07 (dd,  $J$ =8.5, 5.5 Hz, 2H), 7.99 (d,  $J$ =9.0 Hz, 2H), 7.89 (d,  $J$ =9.0 Hz, 2H), 7.38 (t,  $J$ =9.0 Hz, 2H), 7.05 (dd,  $J$ =6.5, 4.0 Hz, 1H).

**<sup>13</sup>C NMR** (125 MHz, DMSO-*d*<sub>6</sub>):  $\delta$  164.5, 164.0 (d,  $^1J_{\text{C-F}}$  = 247.8 Hz), 150.1, 148.1, 145.2, 139.2, 134.9, 131.3, 130.4 (d,  $^3J_{\text{C-F}}$  = 9.1 Hz), 128.8, 126.1, 120.5, 115.3 (d,  $^2J_{\text{C-F}}$  = 21.6 Hz), 108.8, 107.0.

**HRMS** (ESI):  $m/z$  [M+H]<sup>+</sup> calcd for C<sub>19</sub>H<sub>14</sub>FN<sub>4</sub>O<sup>+</sup> 333.1146, found 333.1158.

#### 4-Fluoro-*N*-(4-(imidazo[1,2-*a*]pyrazin-2-yl)phenyl)benzamide (S17)

Following general procedure C using **S69** (39 mg, 0.18 mmol), 4-fluorobenzoyl chloride (22  $\mu$ L, 0.18 mmol) and 60% NaH (10 mg, 0.25 mmol), the title compound **S17** (14 mg, 0.040 mmol) was obtained in 22% yield.

**<sup>1</sup>H NMR** (500 MHz, DMSO-*d*<sub>6</sub>):  $\delta$  10.41 (s, 1H), 9.07 (s, 1H), 8.60 (dd,  $J$ =4.5, 1.5 Hz, 1H), 8.57 (s, 1H), 8.10–8.02 (m, 4H), 7.93–7.88 (m, 3H), 7.40 (t,  $J$ =9.0 Hz, 2H).

**<sup>13</sup>C NMR** (125 MHz, DMSO-*d*<sub>6</sub>):  $\delta$  164.5, 164.0 (d,  $^1J_{\text{C-F}}$  = 247.4 Hz), 146.2, 142.4, 140.4, 139.4, 131.3, 130.4 (d,  $^3J_{\text{C-F}}$  = 9.0 Hz), 129.2, 128.4, 126.4, 120.5, 120.0, 115.4 (d,  $^2J_{\text{C-F}}$  = 21.6 Hz), 110.1.

**HRMS** (ESI):  $m/z$  [M+H]<sup>+</sup> calcd for C<sub>19</sub>H<sub>14</sub>FN<sub>4</sub>O<sup>+</sup> 333.1146, found 333.1156.

#### 4-Fluoro-*N*-(4-(imidazo[1,2-*b*]pyridazin-2-yl)phenyl)benzamide (S18)

Following general procedure C using **S70** (41 mg, 0.19 mmol), 4-fluorobenzoyl chloride (23  $\mu$ L, 0.19 mmol) and 60% NaH (6 mg, 0.15 mmol), the title compound **S18** (42 mg, 0.13 mmol) was obtained in 68% yield.

**<sup>1</sup>H NMR** (500 MHz, DMSO-*d*<sub>6</sub>):  $\delta$  10.48 (s, 1H), 8.82 (s, 1H), 8.52–8.48 (m, 1H), 8.14–8.07 (m, 3H), 8.05 (d,  $J$ =8.5 Hz, 2H), 7.91 (d,  $J$ =8.5 Hz, 2H), 7.41–7.33 (m, 2H), 7.26–7.20 (m, 2H).

**<sup>13</sup>C NMR** (125 MHz, DMSO-*d*<sub>6</sub>):  $\delta$  164.5, 164.2 (d,  $^1J_{\text{C-F}}$  = 247.4 Hz), 144.5, 143.8, 139.3, 138.9, 131.3, 130.5 (d,  $^3J_{\text{C-F}}$  = 9.0 Hz), 128.7, 126.1, 124.9, 120.6, 117.7, 115.4 (d,  $^2J_{\text{C-F}}$  = 21.8 Hz), 112.8.

**HRMS** (ESI):  $m/z$  [M+H]<sup>+</sup> calcd for C<sub>19</sub>H<sub>14</sub>FN<sub>4</sub>O<sup>+</sup> 333.1146, found 333.1157.

### **Scheme S10**

#### **8-Fluoro-2-(4-nitrophenyl)imidazo[1,2-*a*]pyridine (S74)**

Following general procedure A using **S38** (274 mg, 1.1 mmol), **S71** (100 mg, 1.1 mmol), and Na<sub>2</sub>CO<sub>3</sub> (237 mg, 2.2 mmol), the title compound **S74** (67 mg, 0.20 mmol) was obtained in 23% yield.

<sup>1</sup>H NMR (500 MHz, DMSO-*d*<sub>6</sub>): δ 8.79 (d, *J* = 3.4 Hz, 1H), 8.45 (d, *J* = 6.3 Hz, 1H), 8.40 (s, 1H), 8.32 (d, *J* = 9.2 Hz, 2H), 7.26 (d, *J* = 9.2 Hz, 2H), 7.22 (dd, *J* = 11.5, 7.5 Hz, 1 H), 6.94 (m, 1H).

LRMS (ESI): *m/z* [M+H]<sup>+</sup> calcd. for C<sub>13</sub>H<sub>9</sub>FN<sub>3</sub>O<sub>2</sub><sup>+</sup> 258, found 258.

#### **7-Fluoro-2-(4-nitrophenyl)imidazo[1,2-*a*]pyridine (S75)**

Following general procedure A using **S38** (274 mg, 1.12 mmol), **S72** (100 mg, 1.12 mmol), and Na<sub>2</sub>CO<sub>3</sub> (237 mg, 2.24 mmol), the title compound **S75** (112 mg, 0.43 mmol) was obtained in 39% yield.

<sup>1</sup>H NMR (500 MHz, DMSO-*d*<sub>6</sub>): δ 8.66 (t, *J* = 7.5 Hz, 1H), 8.31 (d, *J* = 9.2 Hz, 2H), 8.21 (d, *J* = 9.2 Hz, 2H), 7.50 (dd, *J* = 9.4, 2.3 Hz, 1H), 7.04 (td, *J* = 8.0, 2.3, 1H).

LRMS (ESI): *m/z* [M+H]<sup>+</sup> calcd. for C<sub>13</sub>H<sub>9</sub>FN<sub>3</sub>O<sub>2</sub><sup>+</sup> 258, found 258.

#### **6-Fluoro-2-(4-nitrophenyl)imidazo[1,2-*a*]pyridine (S76)**

Following general procedure A using **S38** (274 mg, 1.12 mmol), **S73** (100 mg, 1.12 mmol) and Na<sub>2</sub>CO<sub>3</sub> (237 mg, 2.24 mmol), the title compound **S76** (94 mg, 0.36 mmol) was obtained in 33% yield.

<sup>1</sup>H NMR (500 MHz, DMSO-*d*<sub>6</sub>): δ 8.82 (dd, *J* = 4.0, 2.3 Hz, 1H), 8.64 (s, 1H), 8.31 (d, *J* = 9.2 Hz, 2H), 8.23 (d, *J* = 8.6 Hz, 2H), 7.71 (dd, *J* = 9.7, 5.2 Hz, 1H), 7.41 (td, *J* = 8.6, 2.3 Hz, 1H).

LRMS (ESI): *m/z* [M+H]<sup>+</sup> calcd. for C<sub>13</sub>H<sub>9</sub>FN<sub>3</sub>O<sub>2</sub><sup>+</sup> 258, found 258.

#### **8-Fluoro-2-(4-aminophenyl)imidazo[1,2-*a*]pyridine (S77)**

Following general procedure B using **S74** (66 mg, 0.26 mmol), 1,4-cyclohexadiene (240 μL, 2.6 mmol) and 10% Pd/C (7 mg), the title compound **S77** (28 mg, 0.12 mmol) was obtained in 47% yield.

<sup>1</sup>H NMR (400 MHz, CD<sub>3</sub>OD): δ 8.16 (dd, *J* = 7.2, 0.9 Hz, 1H), 8.03 (d, *J* = 3.1 Hz, 1H), 7.66 (d, *J* = 8.5 Hz, 2H), 6.99 (ddd, *J* = 10.8, 7.6, 0.9 Hz, 1H), 6.80–6.74 (m, 3H).

LRMS (ESI): *m/z* [M+H]<sup>+</sup> calcd. for C<sub>13</sub>H<sub>11</sub>FN<sub>3</sub><sup>+</sup> 228, found 228.

#### **7-Fluoro-2-(4-aminophenyl)imidazo[1,2-*a*]pyridine (S78)**

Following general procedure B using **S75** (100 mg, 0.39 mmol), 1,4-cyclohexadiene (362 μL, 3.9 mmol) and 10% Pd/C (10 mg), the title compound **S78** (88 mg, 0.39 mmol) was obtained in 99% yield.

<sup>1</sup>H NMR (500 MHz, DMSO-*d*<sub>6</sub>): δ 8.52 (t, *J* = 7.5 Hz, 1H), 8.09 (s, 1H), 7.60 (d, *J* = 8.6 Hz, 2H), 7.33 (dd, *J* = 10.3, 2.9 Hz, 1H), 6.88 (td, *J* = 7.5, 2.3 Hz, 1H), 6.60 (d, *J* = 8.6 Hz, 2H), 5.23 (s, 2H).

LRMS (ESI): *m/z* [M+H]<sup>+</sup> calcd. for C<sub>13</sub>H<sub>11</sub>FN<sub>3</sub><sup>+</sup> 228, found 228.

#### 6-Fluoro-2-(4-aminophenyl)imidazo[1,2-*a*]pyridine (S79)

Following general procedure B using **S76** (50 mg, 0.19 mmol), 1,4-cyclohexadiene (181  $\mu$ L, 1.9 mmol) and 10% Pd/C (5 mg), the title compound **S79** (24 mg, 0.11 mmol) was obtained in 56% yield.

**<sup>1</sup>H NMR** (400 MHz, CDCl<sub>3</sub>):  $\delta$  8.04–8.02 (m, 1H), 7.81–7.72 (m, 3H), 7.60–7.53 (m, 1H), 7.09–7.02 (m, 1H), 6.75 (d,  $J$  = 8.8 Hz, 2H), 3.80 (br s, 2H).

**LRMS** (ESI):  $m/z$  [M+H]<sup>+</sup> calcd. for C<sub>13</sub>H<sub>11</sub>FN<sub>3</sub><sup>+</sup> 228, found 228.

#### 4-Fluoro-*N*-(4-(8-fluorolimidazo[1,2-*a*]pyridin-2-yl)phenyl)benzamide (S19)

Following general procedure C using **S77** (28 mg, 0.12 mmol), 4-fluorobenzoyl chloride (14  $\mu$ L, 0.12 mmol), 60% NaH (10 mg, 0.24 mmol), the title compound **S19** (28 mg, 0.079 mmol) was obtained in 66% yield.

**<sup>1</sup>H NMR** (500 MHz, DMSO-*d*<sub>6</sub>):  $\delta$  10.38 (s, 1H), 8.50 (d,  $J$  = 3.0 Hz, 1H), 8.41 (dd,  $J$  = 6.5, 1.0 Hz, 1H), 8.10–8.05 (m, 2H), 8.00 (d,  $J$  = 9.0 Hz, 2H), 7.89 (d,  $J$  = 9.0 Hz, 2H), 7.40 (t,  $J$  = 9.0 Hz, 2H), 7.15 (dd,  $J$  = 11.5, 8.0 Hz, 1H), 6.90–6.85 (m, 1H).

**<sup>13</sup>C NMR** (125 MHz, DMSO-*d*<sub>6</sub>):  $\delta$  164.4, 164.1 (d,  $^1J_{\text{C-F}}$  = 248.4 Hz), 150.4 (d,  $^1J_{\text{C-F}}$  = 247.1 Hz), 144.5, 139.0, 137.2 (d,  $^2J_{\text{C-F}}$  = 28.8 Hz), 131.4, 130.4 (d,  $^3J_{\text{C-F}}$  = 9.0 Hz), 128.7, 126.0, 123.5 (d,  $^4J_{\text{C-F}}$  = 4.6 Hz), 120.5, 115.4 (d,  $^2J_{\text{C-F}}$  = 21.6 Hz), 111.3 (d,  $^3J_{\text{C-F}}$  = 7.1 Hz), 110.4, 107.6 (d,  $^2J_{\text{C-F}}$  = 16.0 Hz).

**HRMS** (ESI):  $m/z$  [M+H]<sup>+</sup> calcd for C<sub>20</sub>H<sub>14</sub>F<sub>2</sub>N<sub>3</sub>O<sup>+</sup> 350.1099, found 350.1100.

#### 4-Fluoro-*N*-(4-(7-fluorolimidazo[1,2-*a*]pyridin-2-yl)phenyl)benzamide (S20)

Following general procedure C using **S78** (88 mg, 0.39 mmol), 4-fluorobenzoyl chloride (47  $\mu$ L, 0.39 mmol) and 60% NaH (32 mg, 0.8 mmol), the title compound **S20** (89 mg, 0.26 mmol) was obtained in 66% yield.

**<sup>1</sup>H NMR** (500 MHz, DMSO-*d*<sub>6</sub>):  $\delta$  10.37 (s, 1H), 8.61 (d,  $J$  = 6.5 Hz, 1H), 8.34 (s, 1H), 8.09–8.04 (m, 2H), 7.95 (d,  $J$  = 9.0 Hz, 2H), 7.87 (d,  $J$  = 9.0 Hz, 2H), 7.44 (dd,  $J$  = 10.0, 2.5 Hz, 1H), 7.39 (t,  $J$  = 9.0 Hz, 2H), 6.97 (td,  $J$  = 7.5, 2.5 Hz, 1H).

**<sup>13</sup>C NMR** (125 MHz, DMSO-*d*<sub>6</sub>):  $\delta$  164.4, 164.1 (d,  $^1J_{\text{C-F}}$  = 247.6 Hz), 159.7 (d,  $^1J_{\text{C-F}}$  = 246.4 Hz), 145.3, 144.9 (d,  $^3J_{\text{C-F}}$  = 14.4 Hz), 138.8, 131.4 (d,  $^4J_{\text{C-F}}$  = 2.8 Hz), 130.4 (d,  $^3J_{\text{C-F}}$  = 9.0 Hz), 129.1, 128.8 (d,  $^3J_{\text{C-F}}$  = 10.9 Hz), 125.9, 120.5, 115.3 (d,  $^2J_{\text{C-F}}$  = 21.8 Hz), 108.4, 104.2 (d,  $^2J_{\text{C-F}}$  = 29.1 Hz), 100.0 (d,  $^2J_{\text{C-F}}$  = 23.4 Hz).

**HRMS** (ESI):  $m/z$  [M+H]<sup>+</sup> calcd for C<sub>20</sub>H<sub>14</sub>F<sub>2</sub>N<sub>3</sub>O<sup>+</sup> 350.1099, found 350.1107.

### **Scheme S11**

#### **4-Amino-*N*-(4-(8-methylimidazo[1,2-*a*]pyridin-2-yl)phenyl)benzamide (S27)**

Following general procedure B using **S26** (60 mg, 0.16 mmol), 1,4-cyclohexadiene (150  $\mu$ L, 1.6 mmol) and 10% Pd/C (6 mg), the title compound **S27** (18 mg, 0.05 mmol) was obtained in 31% yield.

**<sup>1</sup>H NMR** (500 MHz, DMSO-*d*<sub>6</sub>):  $\delta$  9.84 (s, 1H), 8.35 (d, *J* = 7.0 Hz, 1H), 8.30 (s, 1H), 7.92 (d, *J* = 9.0 Hz, 2H), 7.84 (d, *J* = 9.0 Hz, 2H), 7.75 (d, *J* = 8.5 Hz, 2H), 7.03 (d, *J* = 6.5 Hz, 1H), 6.79 (t, *J* = 6.5 Hz, 1H), 6.61 (d, *J* = 8.5 Hz, 2H), 5.77 (s, 2H), 2.54 (s, 3H).

**<sup>13</sup>C NMR** (125 MHz, DMSO-*d*<sub>6</sub>):  $\delta$  165.2, 152.2, 145.2, 143.8, 139.3, 129.4, 128.7, 126.0, 125.7, 124.5, 123.2, 121.1, 120.2, 112.6, 112.1, 108.9, 16.7.

**HRMS** (ESI): *m/z* [M+H]<sup>+</sup> calcd for C<sub>21</sub>H<sub>19</sub>N<sub>4</sub>O<sup>+</sup> 343.1553, found 343.1559.

#### **3-Amino-*N*-(4-(8-methylimidazo[1,2-*a*]pyridin-2-yl)phenyl)benzamide (S30)**

Following general procedure B using **S29** (60 mg, 0.16 mmol), 1,4-cyclohexadiene (150  $\mu$ L, 1.6 mmol) and 10% Pd/C (6 mg), the title compound **S30** (38 mg, 0.11 mmol) was obtained in 69% yield.

**<sup>1</sup>H NMR** (500 MHz, DMSO-*d*<sub>6</sub>):  $\delta$  10.15 (s, 1H), 8.37 (d, *J* = 6.5 Hz, 1H), 8.32 (s, 1H), 7.94 (d, *J* = 8.5 Hz, 2H), 7.86 (d, *J* = 8.5 Hz, 2H), 7.16 (t, *J* = 8.0 Hz, 1H), 7.12 (t, *J* = 2.0 Hz, 1H), 7.09 (d, *J* = 8.0 Hz, 1H), 7.04 (d, *J* = 7.0 Hz, 1H), 6.79 (t, *J* = 7.0 Hz, 1H), 6.76 (ddd, *J* = 8.0, 2.5, 1.0 Hz, 1H), 5.37 (br s, 2H), 2.53 (s, 3H).

**<sup>13</sup>C NMR** (125 MHz, DMSO-*d*<sub>6</sub>):  $\delta$  166.3, 148.8, 145.2, 143.6, 138.9, 135.9, 129.1, 128.8, 125.9, 125.8, 124.5, 123.4, 120.3, 116.8, 114.7, 113.0, 112.1, 109.0, 16.7.

**HRMS** (ESI): *m/z* [M+H]<sup>+</sup> calcd for C<sub>21</sub>H<sub>19</sub>N<sub>4</sub>O<sup>+</sup> 343.1553, found 343.1562.

#### **2-Amino-*N*-(4-(8-methylimidazo[1,2-*a*]pyridin-2-yl)phenyl)benzamide (S32)**

Following general procedure B using **S31** (100 mg, 0.27 mmol), 1,4-cyclohexadiene (250  $\mu$ L, 2.7 mmol) and 10% Pd/C (10 mg), the title compound **S32** (39 mg, 0.11 mmol) was obtained in 42% yield.

**<sup>1</sup>H NMR** (500 MHz, DMSO-*d*<sub>6</sub>):  $\delta$  10.09 (s, 1H), 8.36 (d, *J* = 6.5 Hz, 1H), 8.32 (s, 1H), 7.94 (d, *J* = 8.5 Hz, 2H), 7.81 (d, *J* = 8.5 Hz, 2H), 7.66 (d, *J* = 8.0 Hz, 1H), 7.21 (t, *J* = 7.0 Hz, 1H), 7.04 (d, *J* = 7.0 Hz, 1H), 6.81–6.75 (m, 2H), 6.60 (t, *J* = 7.0 Hz, 1H), 6.35 (br s, 2H), 2.53 (s, 3H).

**<sup>13</sup>C NMR** (125 MHz, DMSO-*d*<sub>6</sub>):  $\delta$  167.8, 149.8, 145.3, 143.7, 138.8, 132.1, 129.2, 128.7, 126.0, 125.7, 124.5, 123.3, 120.6, 116.4, 115.2, 114.7, 112.1, 109.0, 16.7.

**HRMS** (ESI): *m/z* [M+H]<sup>+</sup> calcd for C<sub>21</sub>H<sub>19</sub>N<sub>4</sub>O<sup>+</sup> 343.1553, found 343.1568.

## NMR spectra

$^1\text{H}$  NMR (500 MHz,  $\text{DMSO-}d_6$ ) of compound-23

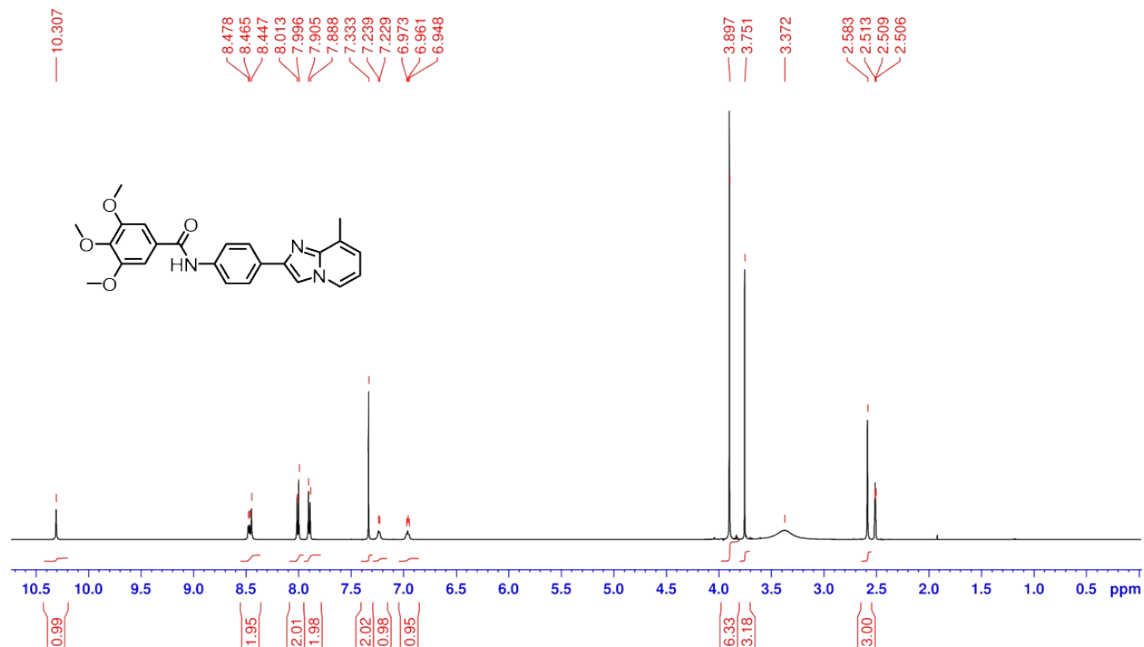

$^{13}\text{C}$  NMR (125 MHz,  $\text{DMSO-}d_6$ ) of compound-23

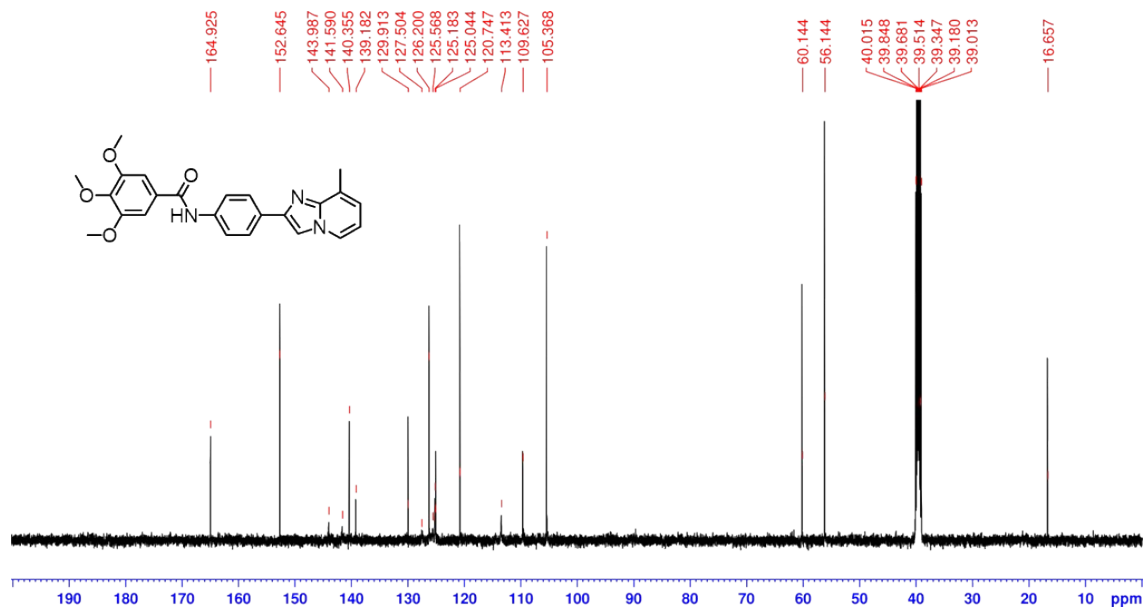

$^1\text{H}$  NMR (500 MHz,  $\text{DMSO}-d_6$ ) of **1**

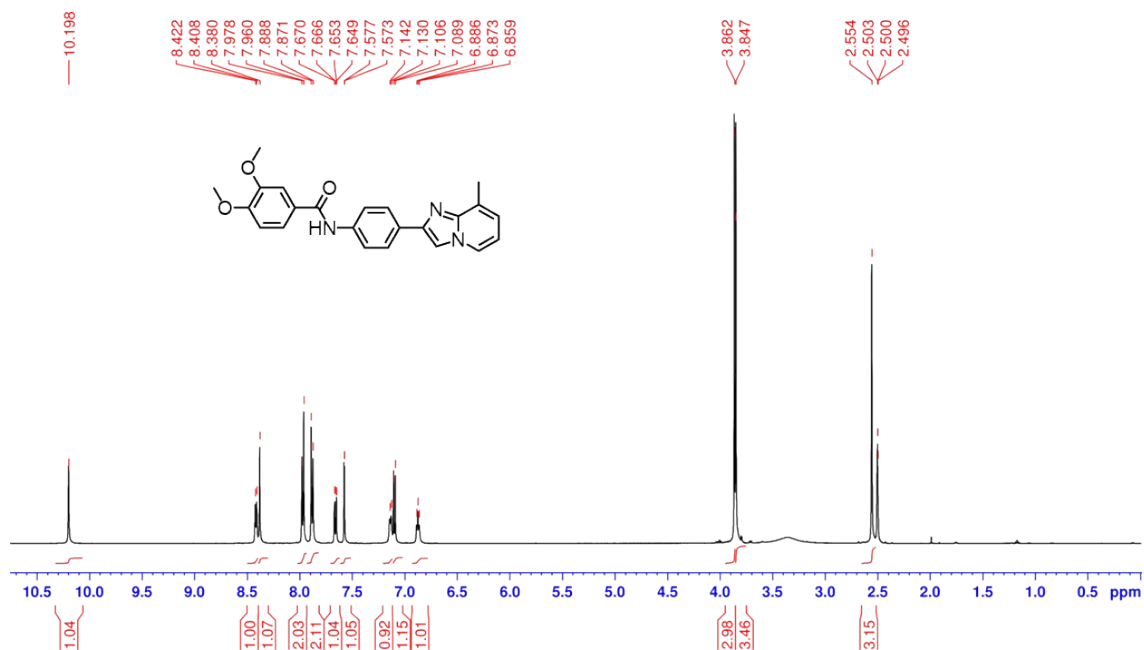

$^{13}\text{C}$  NMR (125 MHz,  $\text{DMSO}-d_6$ ) of **1**

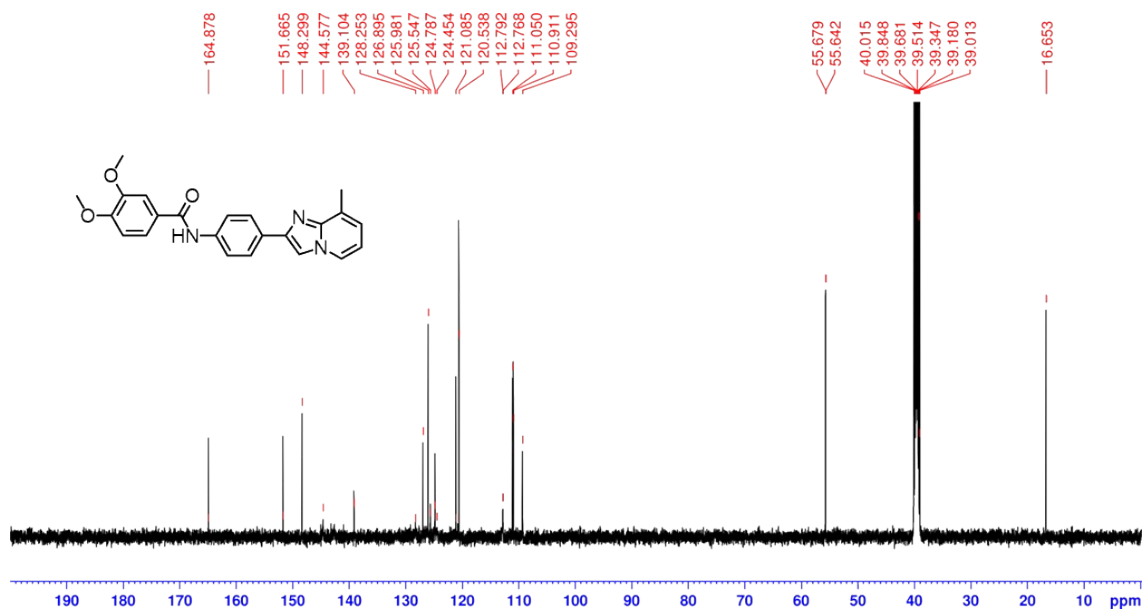

<sup>1</sup>H NMR (500 MHz, DMSO-*d*<sub>6</sub>) of **2**

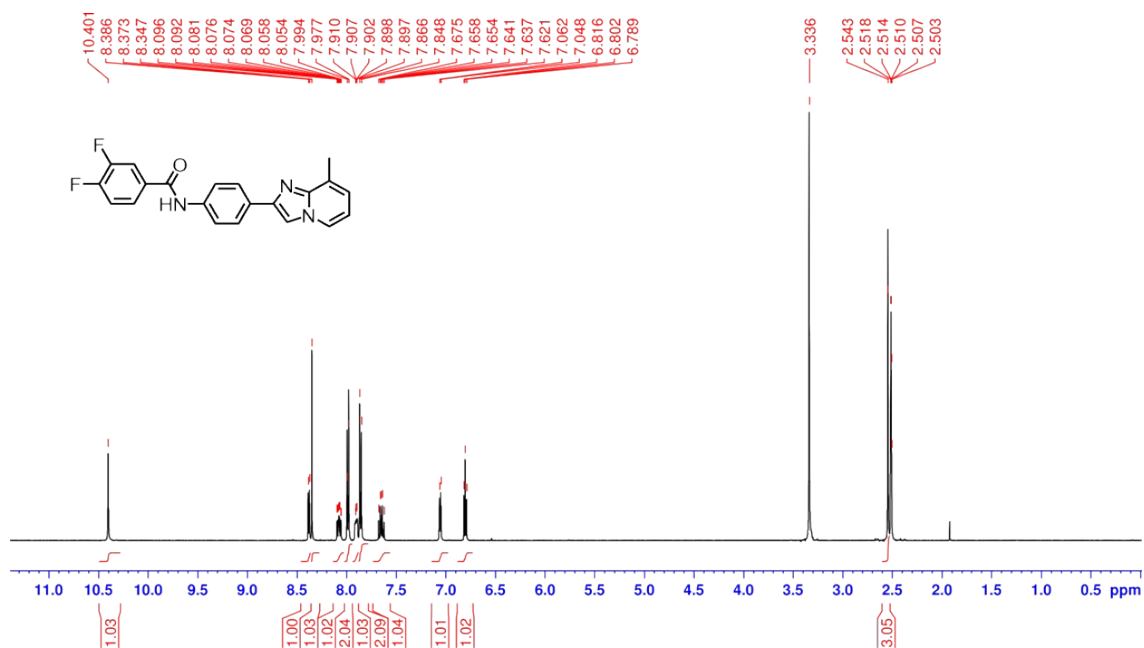

<sup>13</sup>C NMR (125 MHz, DMSO-*d*<sub>6</sub>) of **2**

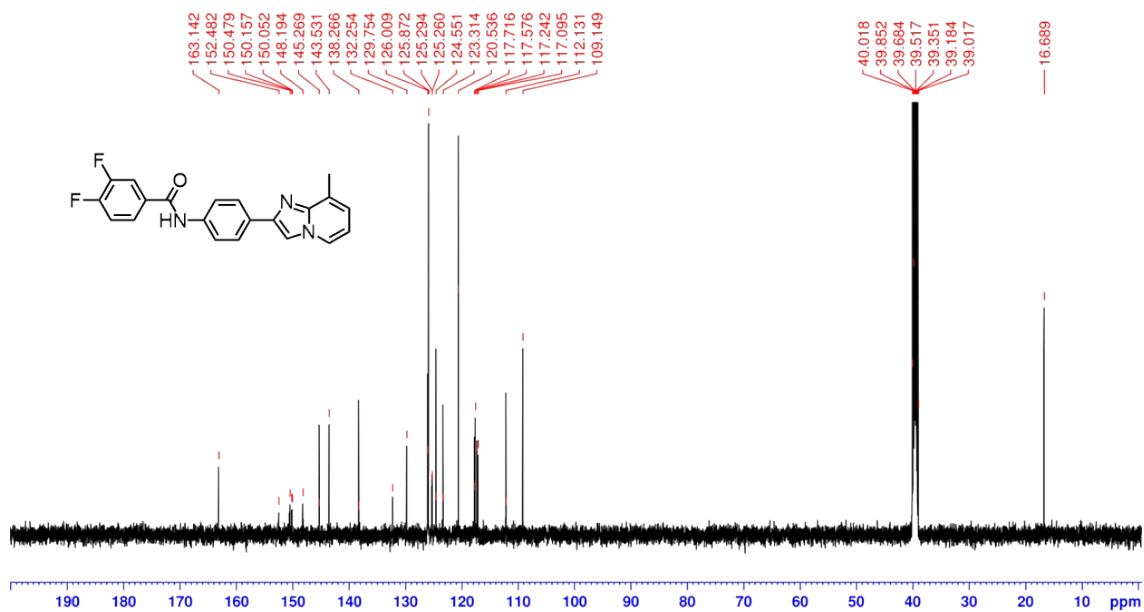

$^1\text{H}$  NMR (500 MHz,  $\text{DMSO}-d_6$ ) of **3**

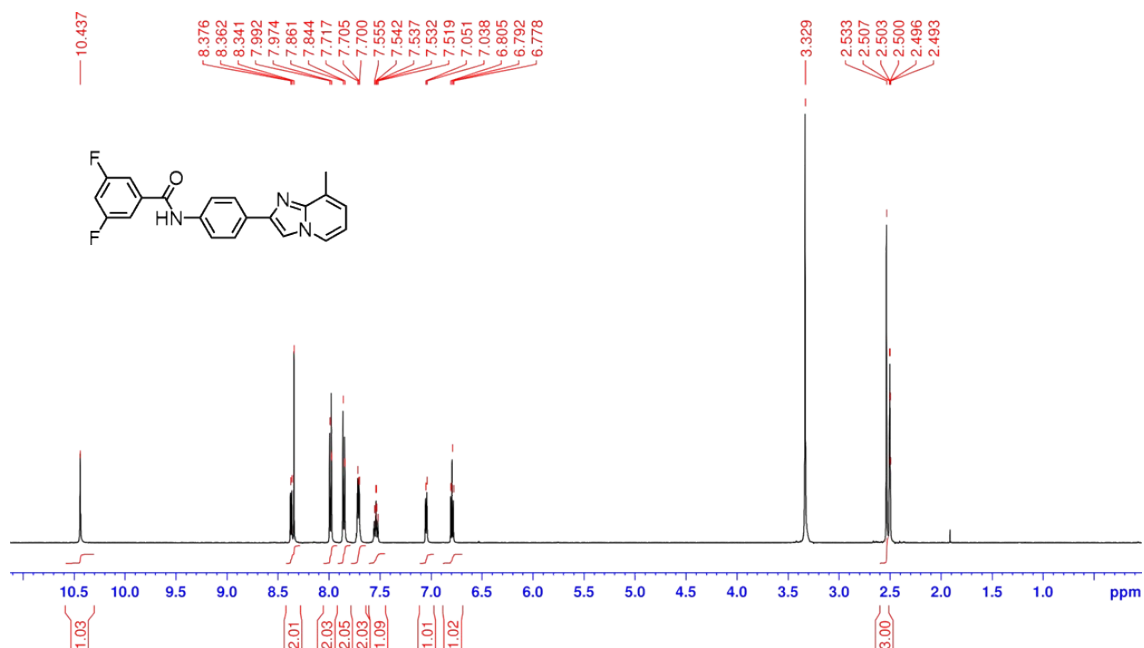

$^{13}\text{C}$  NMR (125 MHz,  $\text{DMSO}-d_6$ ) of **3**

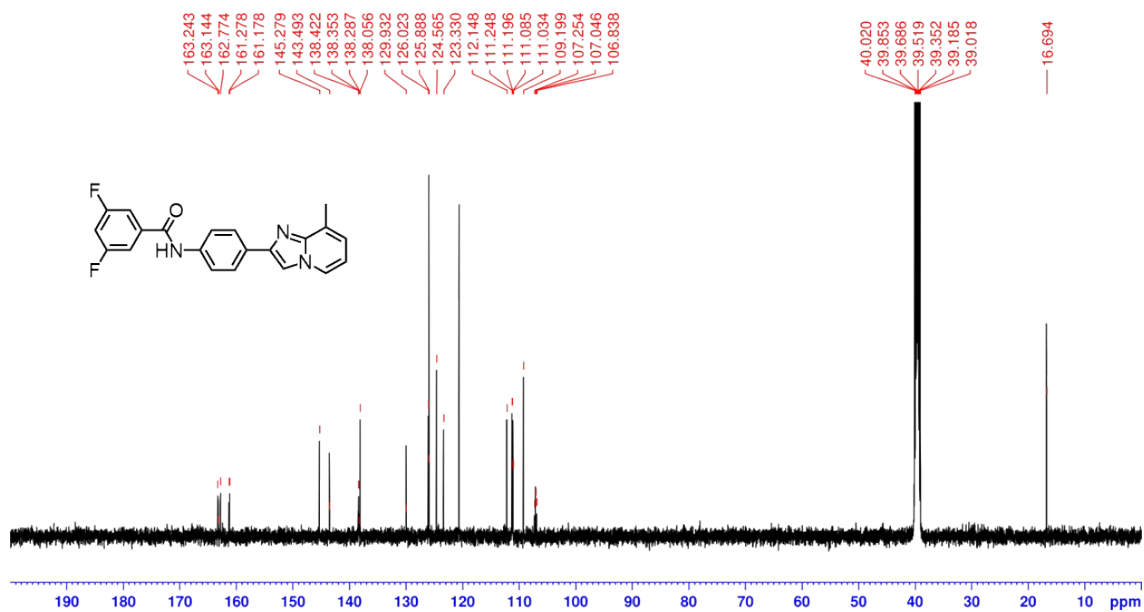



$^1\text{H}$  NMR (500 MHz,  $\text{DMSO}-d_6$ ) of **4**

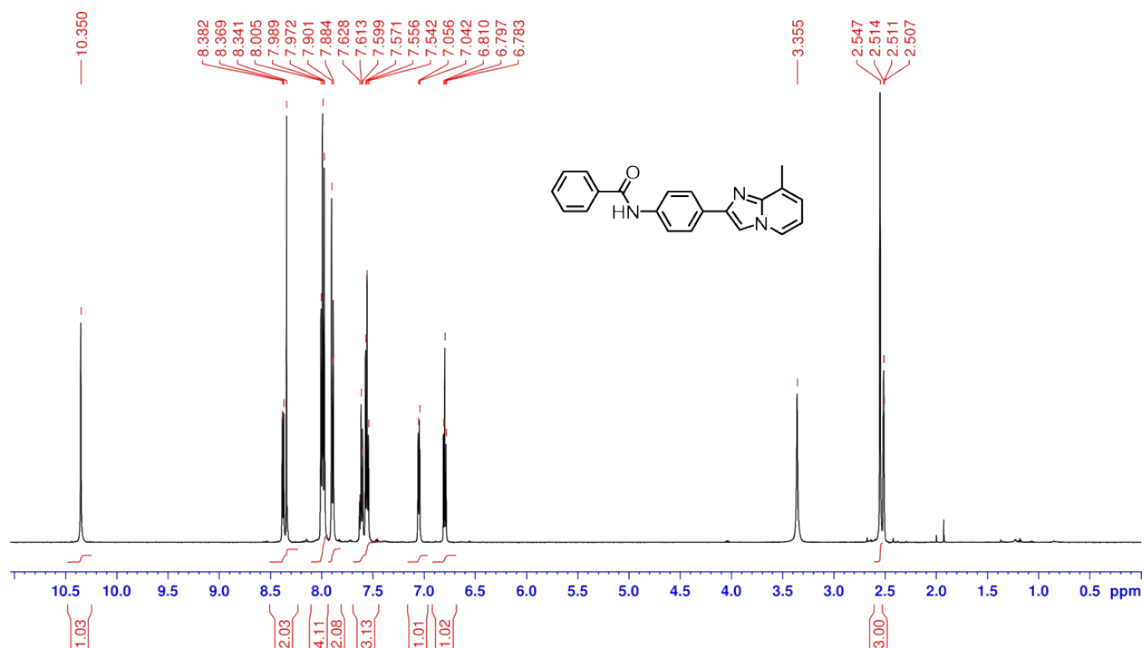

$^{13}\text{C}$  NMR (125 MHz,  $\text{DMSO}-d_6$ ) of **4**

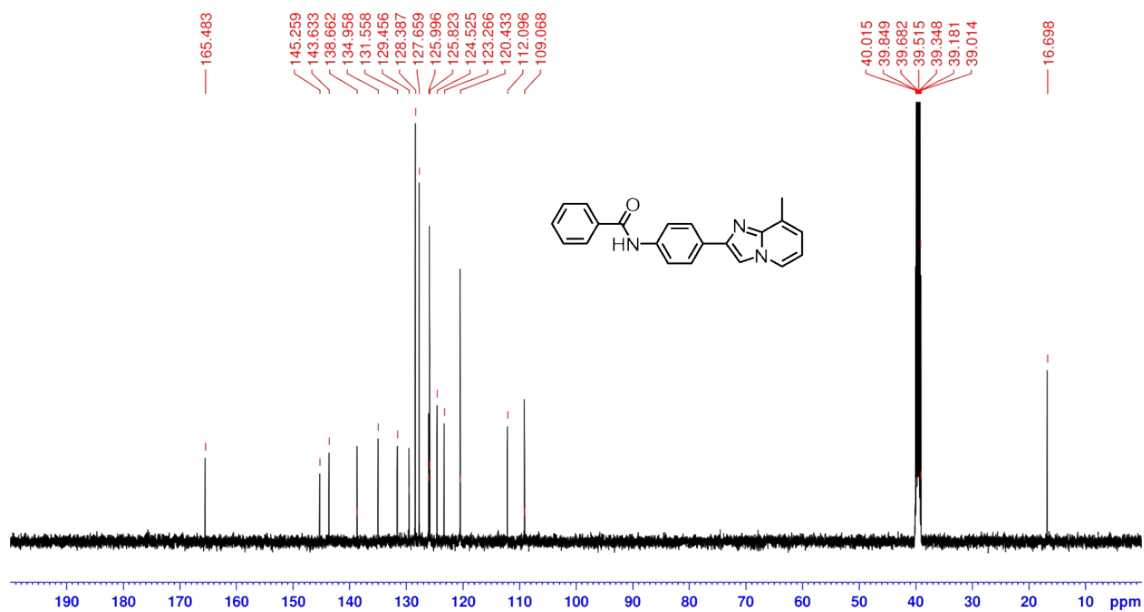

$^1\text{H}$  NMR (500 MHz,  $\text{DMSO}-d_6$ ) of **5**

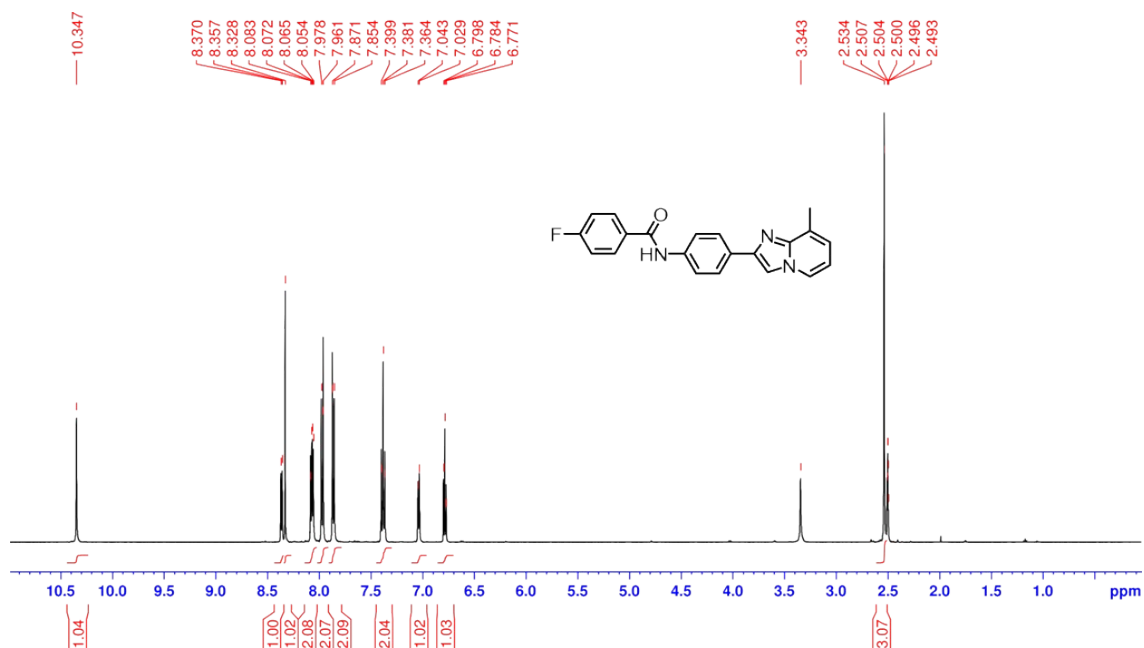

$^{13}\text{C}$  NMR (125 MHz,  $\text{DMSO}-d_6$ ) of **5**

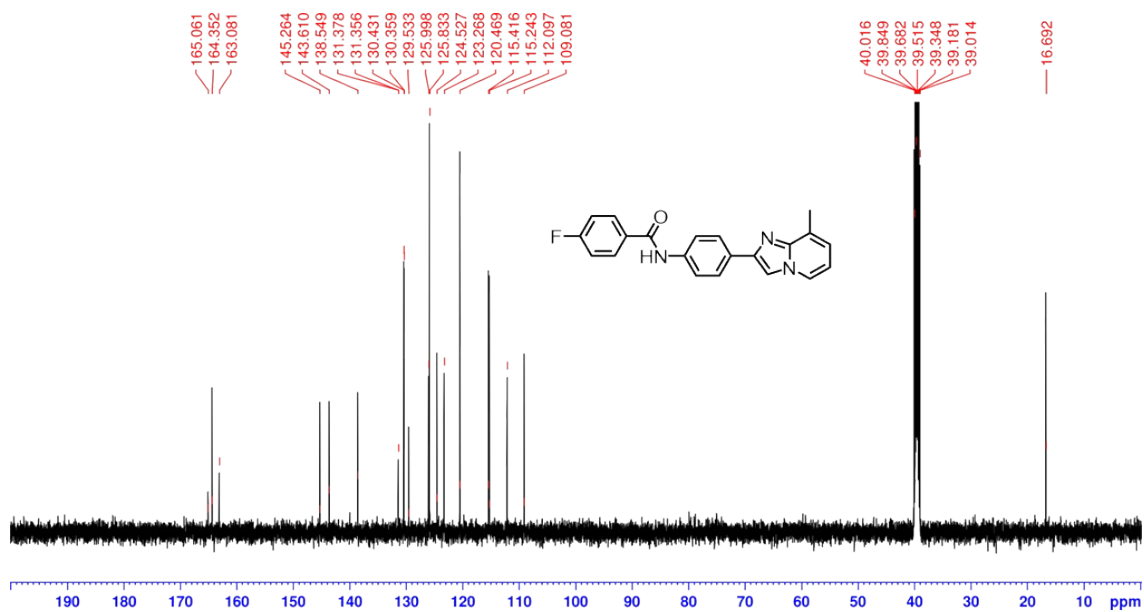

$^1\text{H}$  NMR (500 MHz,  $\text{DMSO}-d_6$ ) of **6**

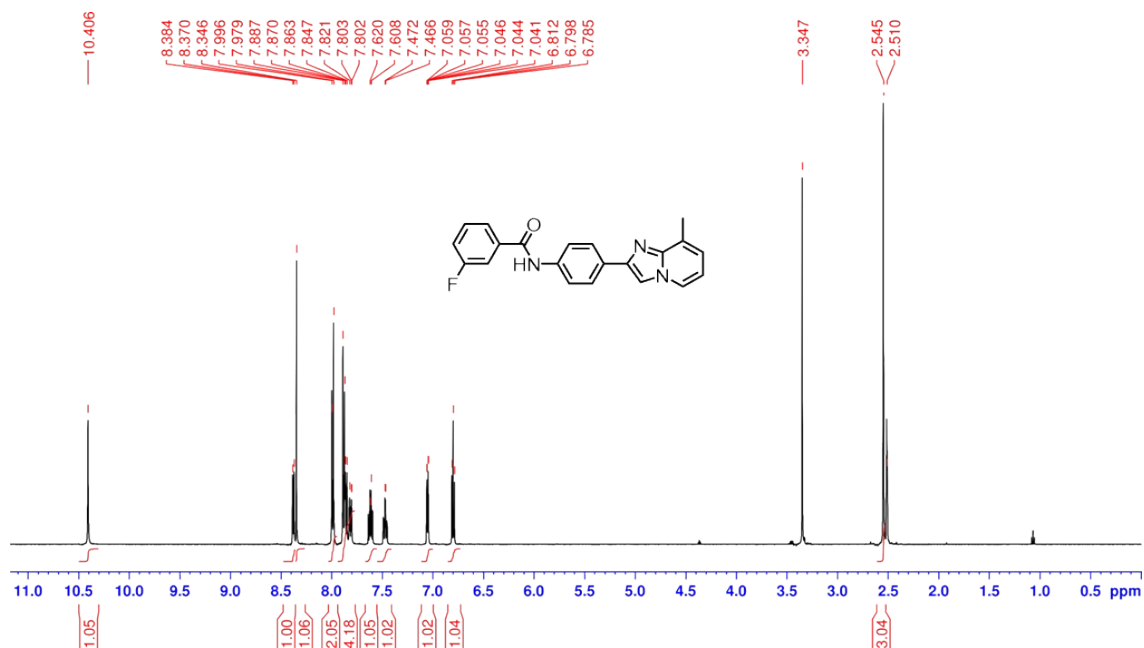

$^{13}\text{C}$  NMR (125 MHz,  $\text{DMSO}-d_6$ ) of **6**

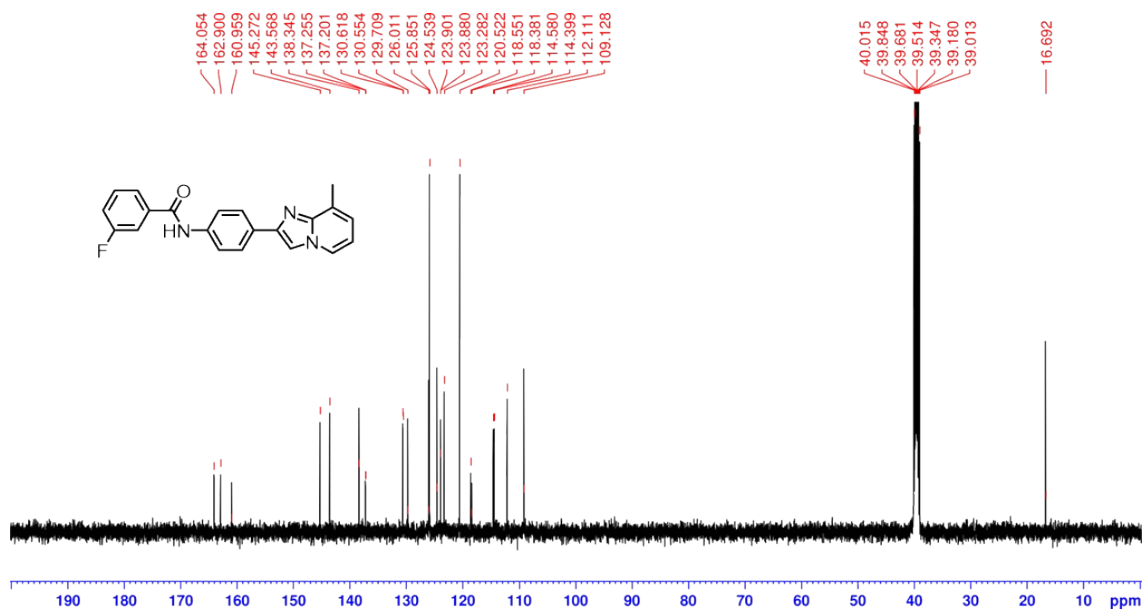

$^1\text{H}$  NMR (500 MHz,  $\text{DMSO-}d_6$ ) of **7**

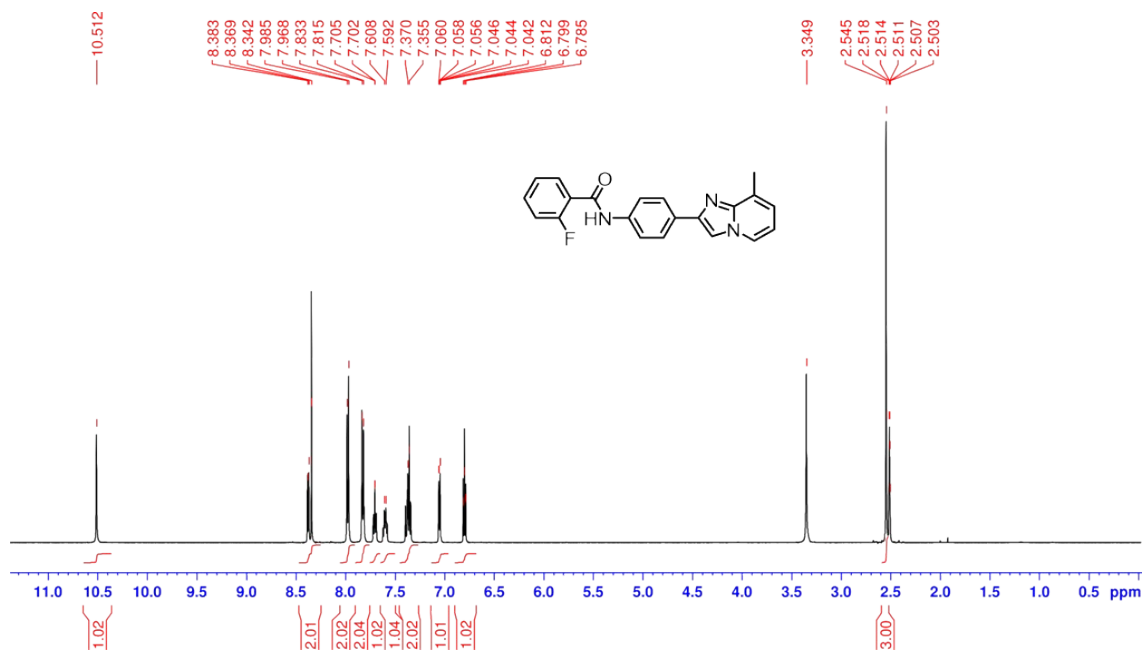

$^{13}\text{C}$  NMR (125 MHz,  $\text{DMSO-}d_6$ ) of **7**

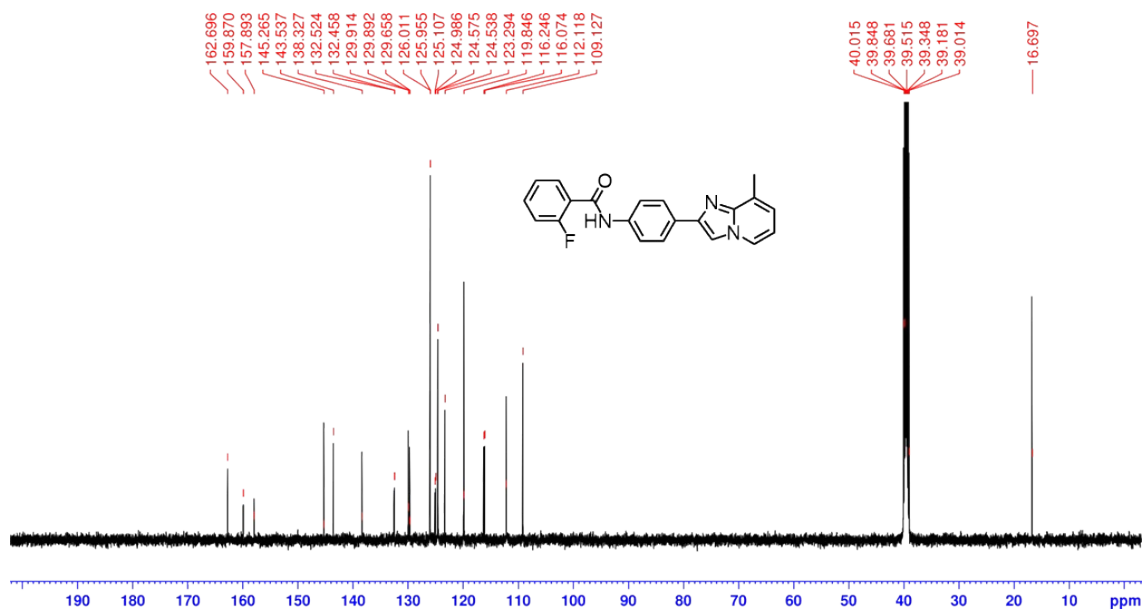

$^1\text{H}$  NMR (500 MHz,  $\text{DMSO}-d_6$ ) of **8**

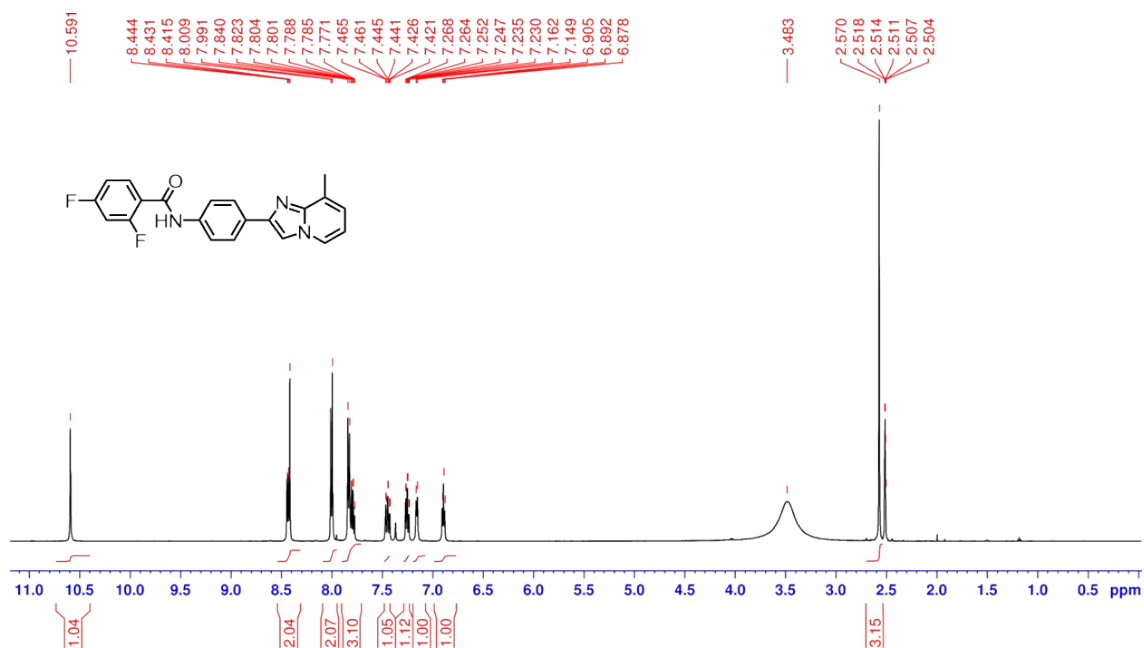

$^{13}\text{C}$  NMR (125 MHz,  $\text{DMSO}-d_6$ ) of **8**

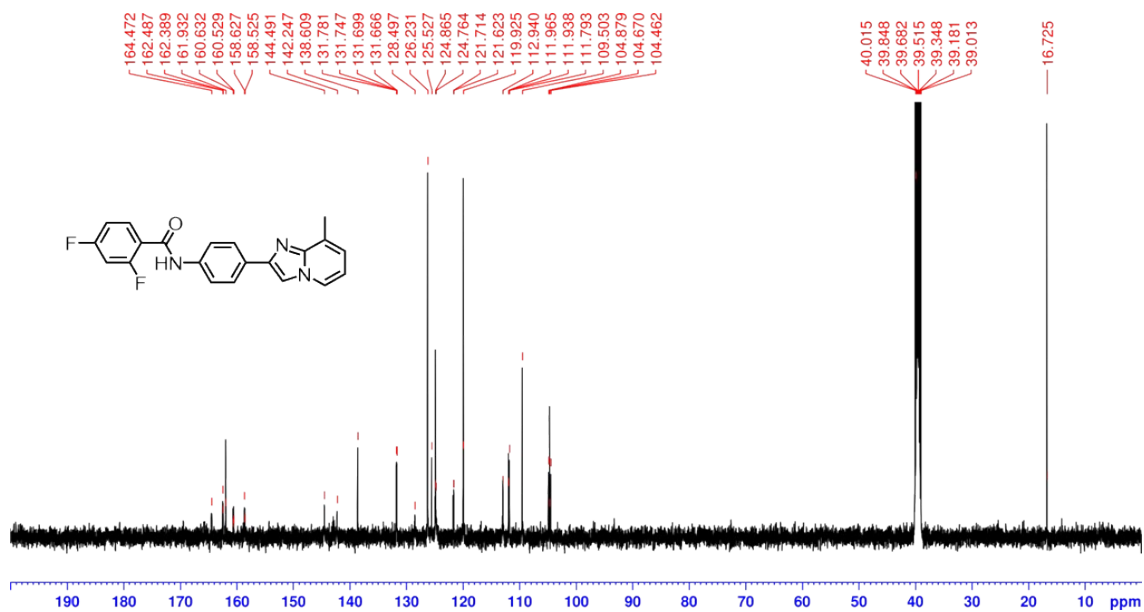

$^1\text{H}$  NMR (500 MHz,  $\text{DMSO}-d_6$ ) of **S1**

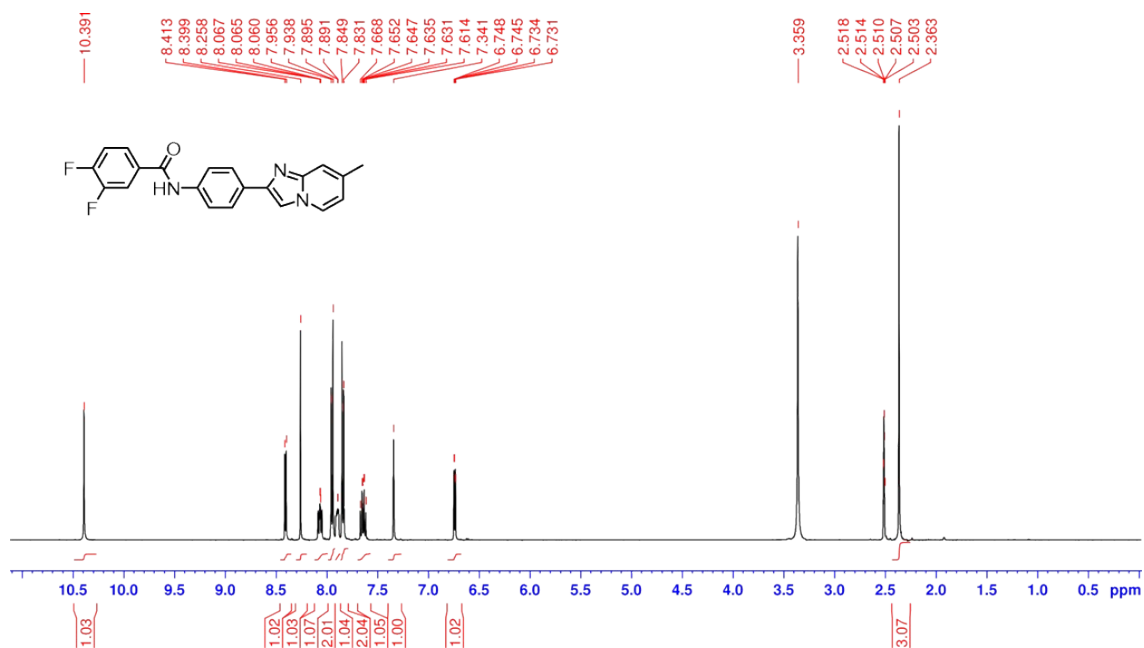

$^{13}\text{C}$  NMR (125 MHz,  $\text{DMSO}-d_6$ ) of **S1**

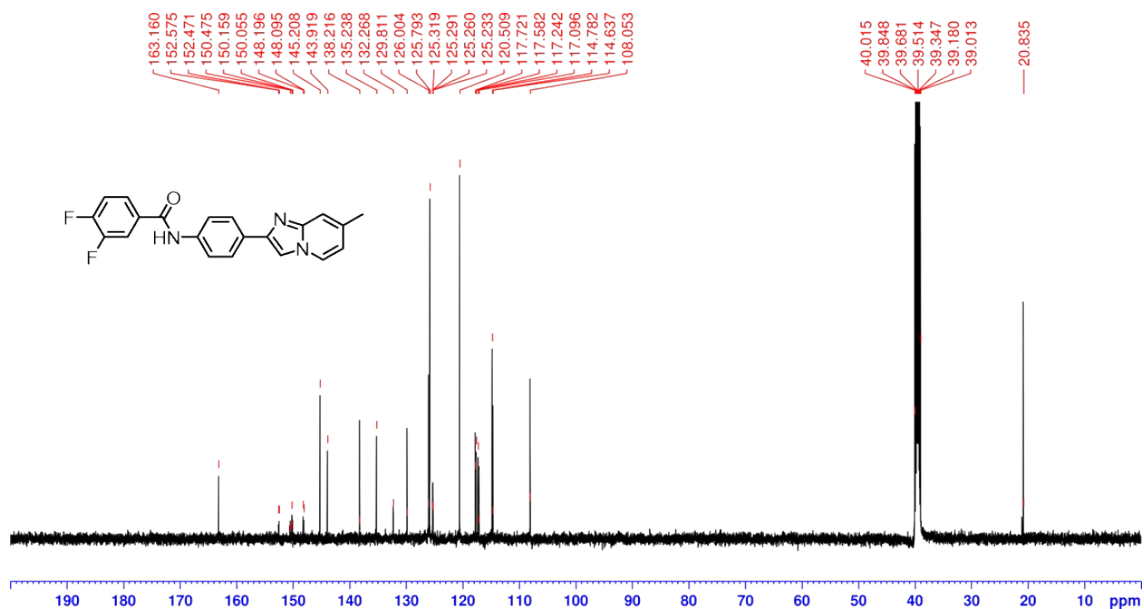

<sup>1</sup>H NMR (500 MHz, DMSO-*d*<sub>6</sub>) of S2

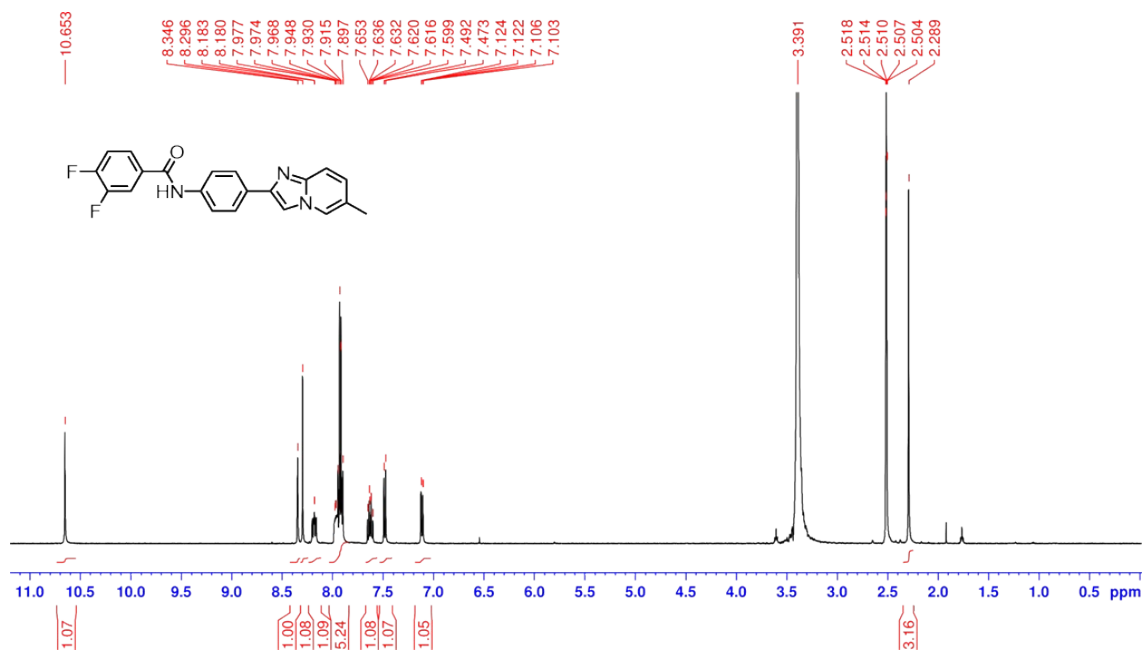

<sup>13</sup>C NMR (125 MHz, DMSO-*d*<sub>6</sub>) of S2

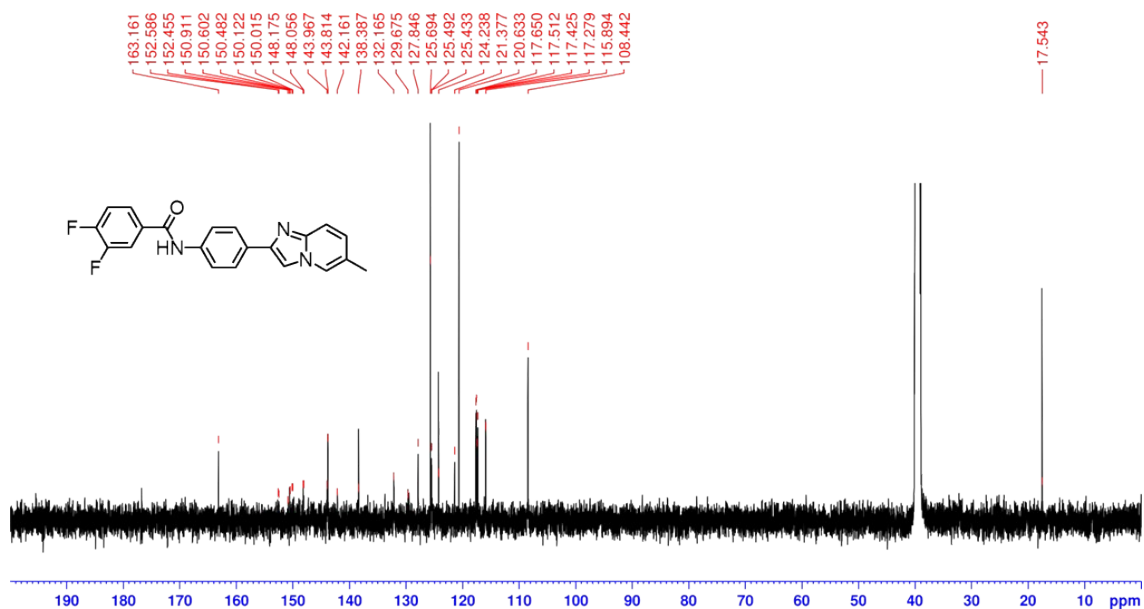

<sup>1</sup>H NMR (500 MHz, DMSO-*d*<sub>6</sub>) of S3

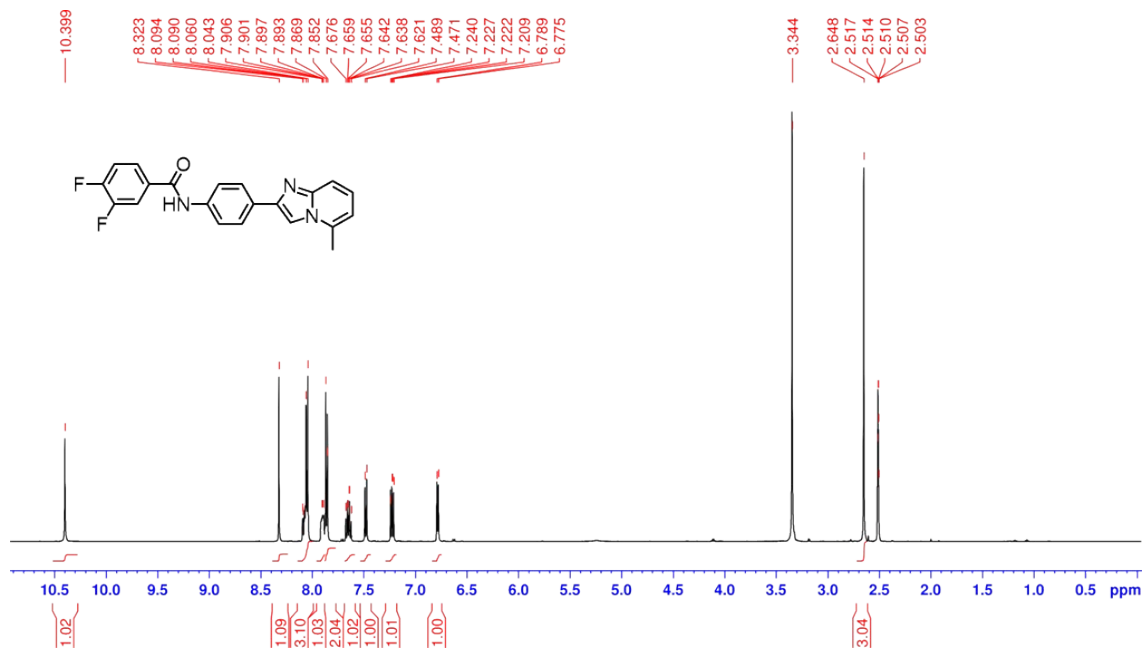

<sup>13</sup>C NMR (125 MHz, DMSO-*d*<sub>6</sub>) of S3

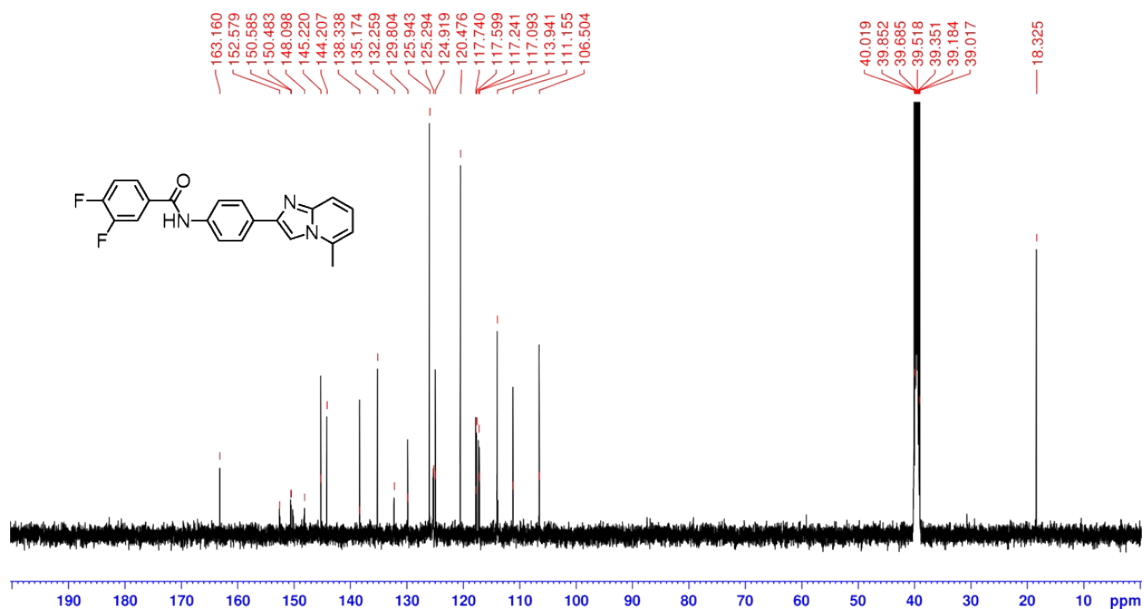



$^1\text{H}$  NMR (500 MHz,  $\text{DMSO}-d_6$ ) of S4

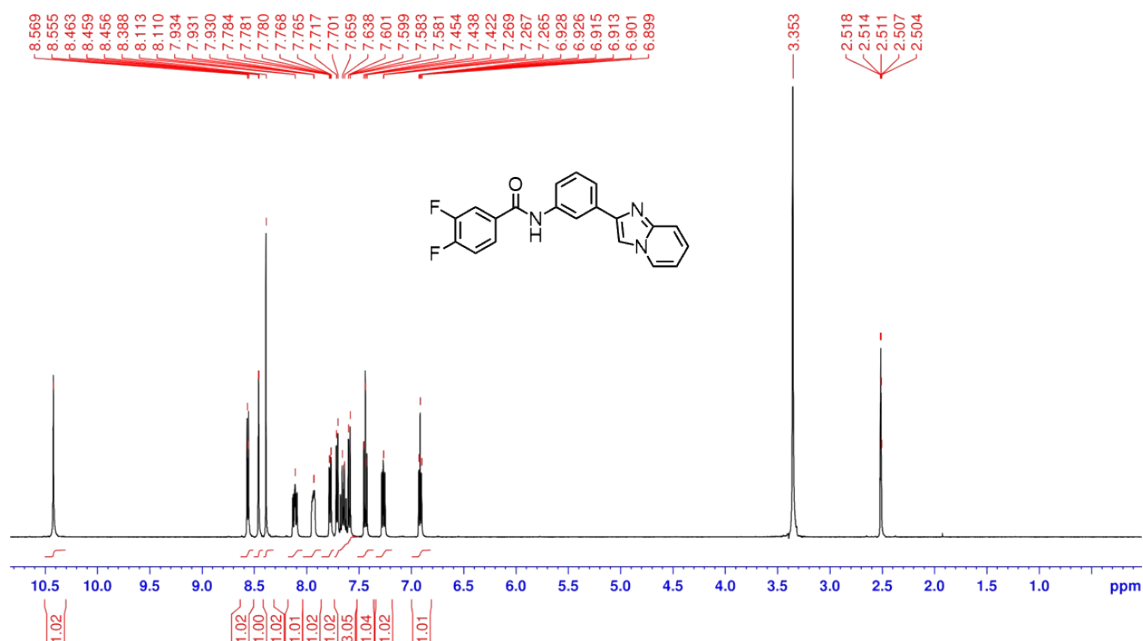

$^{13}\text{C}$  NMR (125 MHz,  $\text{DMSO}-d_6$ ) of S4

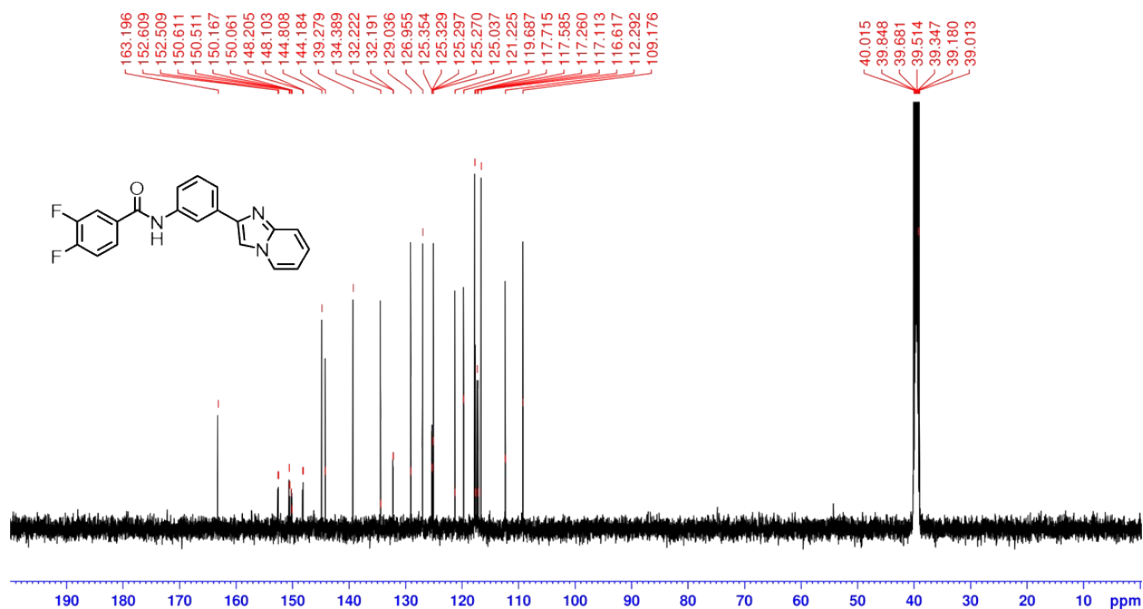

$^1\text{H}$  NMR (500 MHz,  $\text{DMSO}-d_6$ ) of **S5**

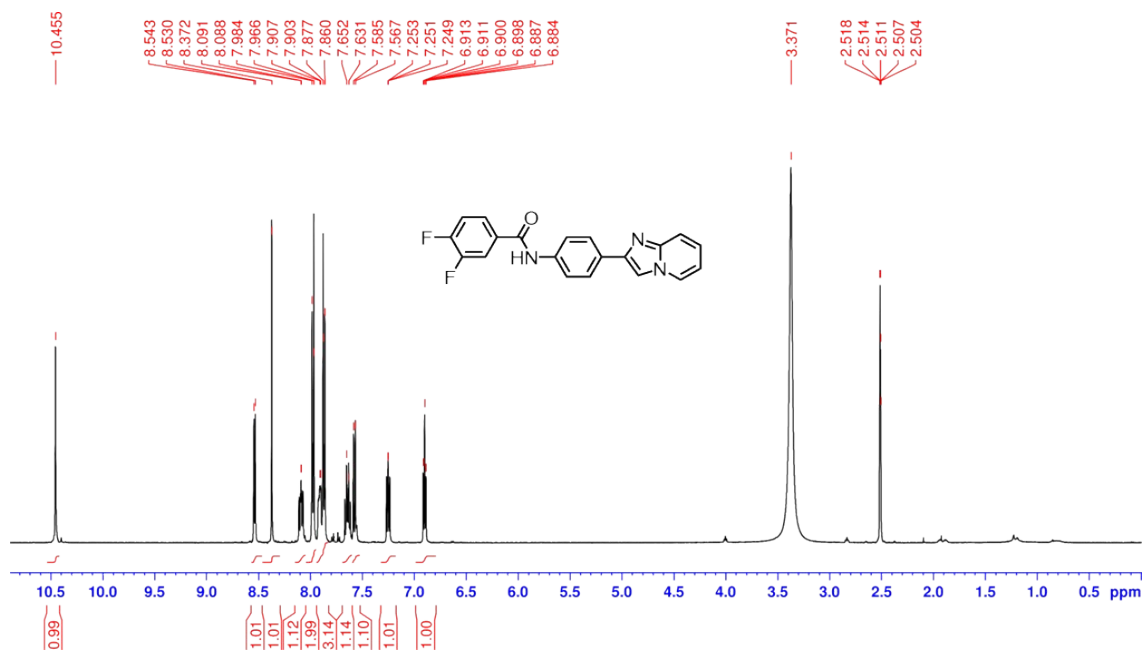

$^{13}\text{C}$  NMR (125 MHz,  $\text{DMSO}-d_6$ ) of **S5**

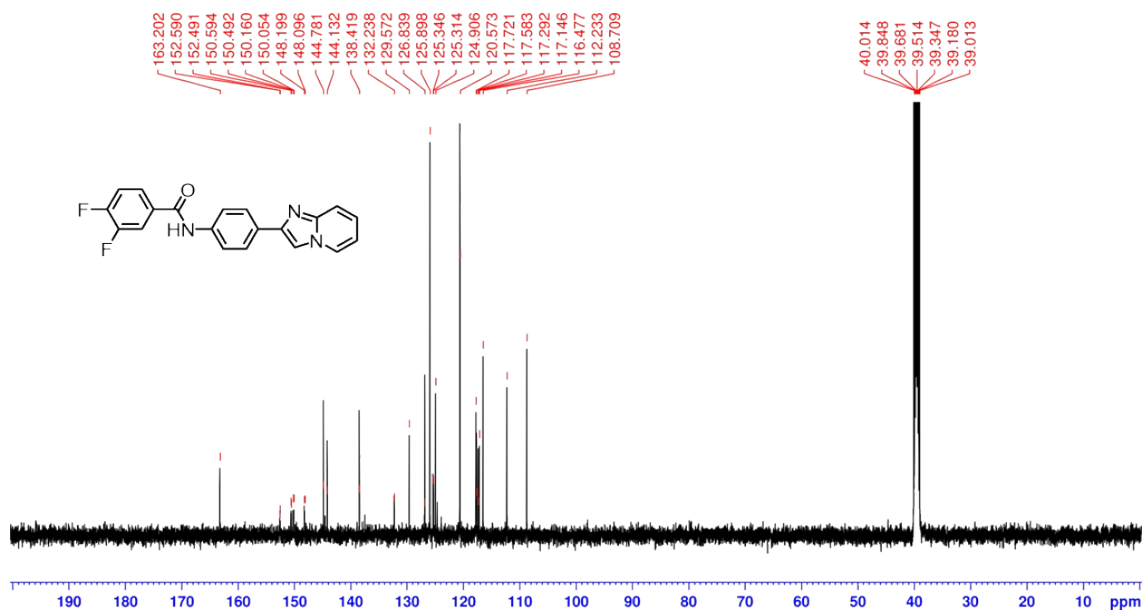

$^1\text{H}$  NMR (500 MHz,  $\text{DMSO}-d_6$ ) of **S6**

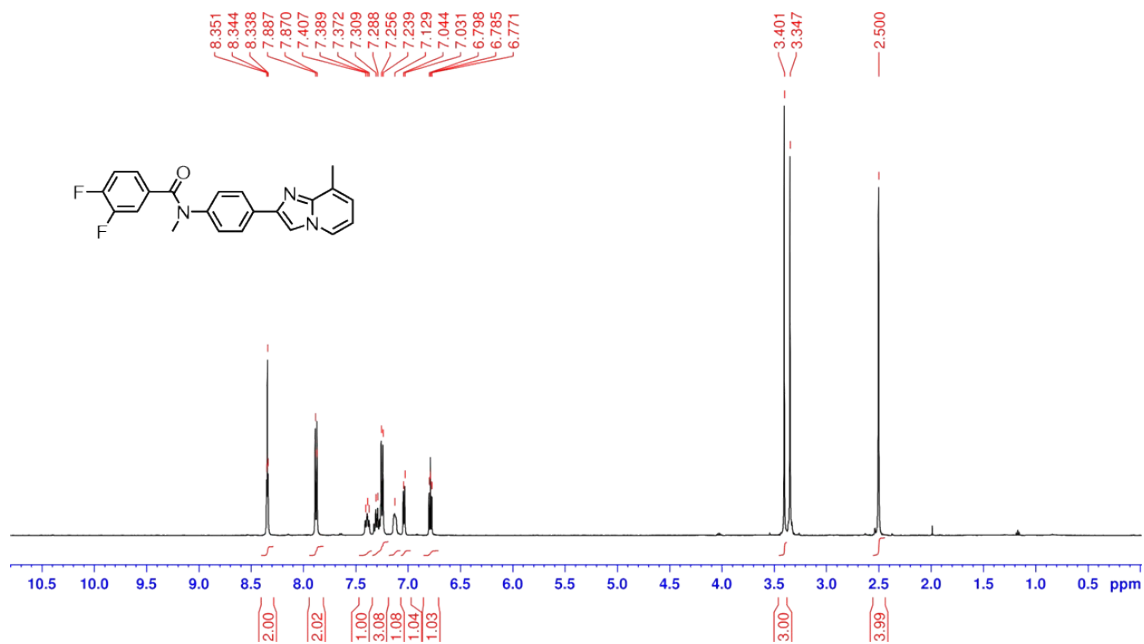

$^{13}\text{C}$  NMR (125 MHz,  $\text{DMSO}-d_6$ ) of **S6**

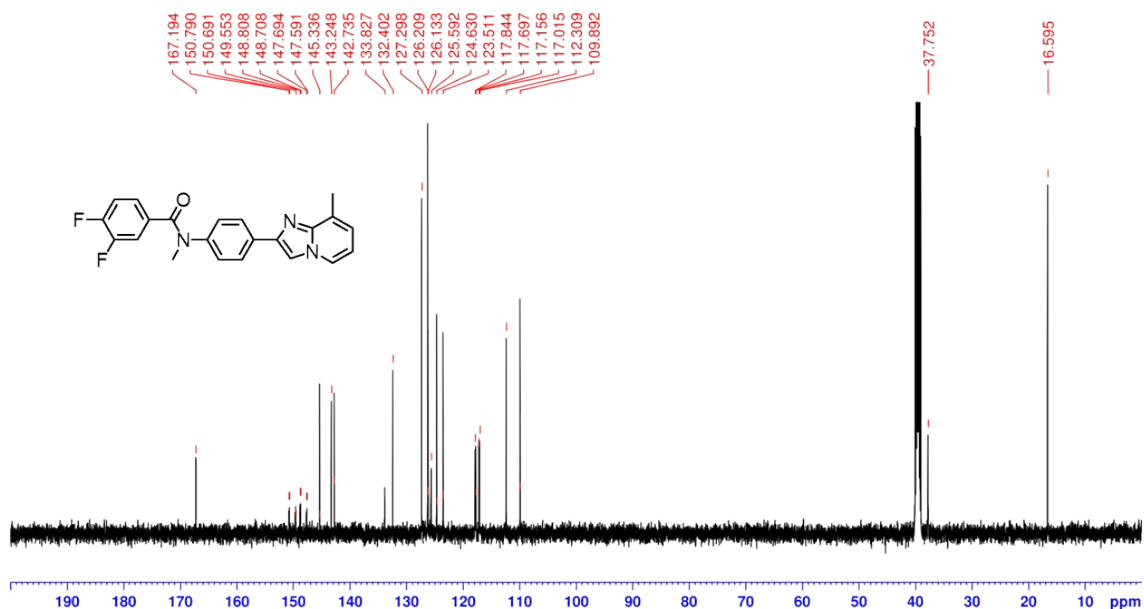

$^1\text{H}$  NMR (500 MHz,  $\text{DMSO}-d_6$ ) of **S7**

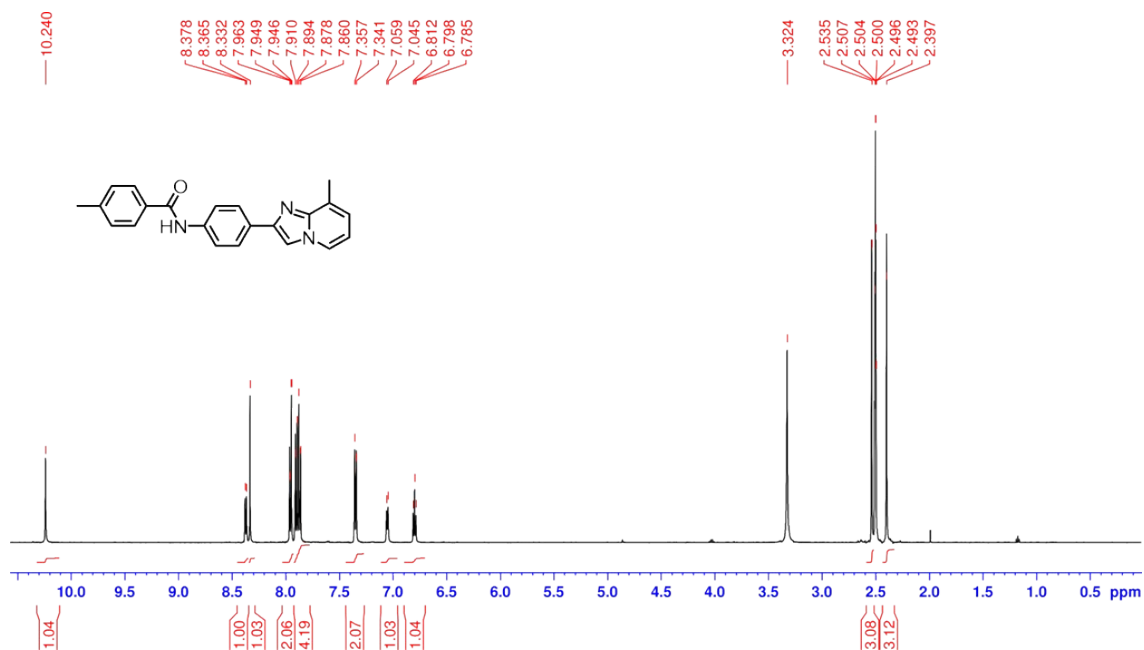

$^{13}\text{C}$  NMR (125 MHz,  $\text{DMSO}-d_6$ ) of **S7**

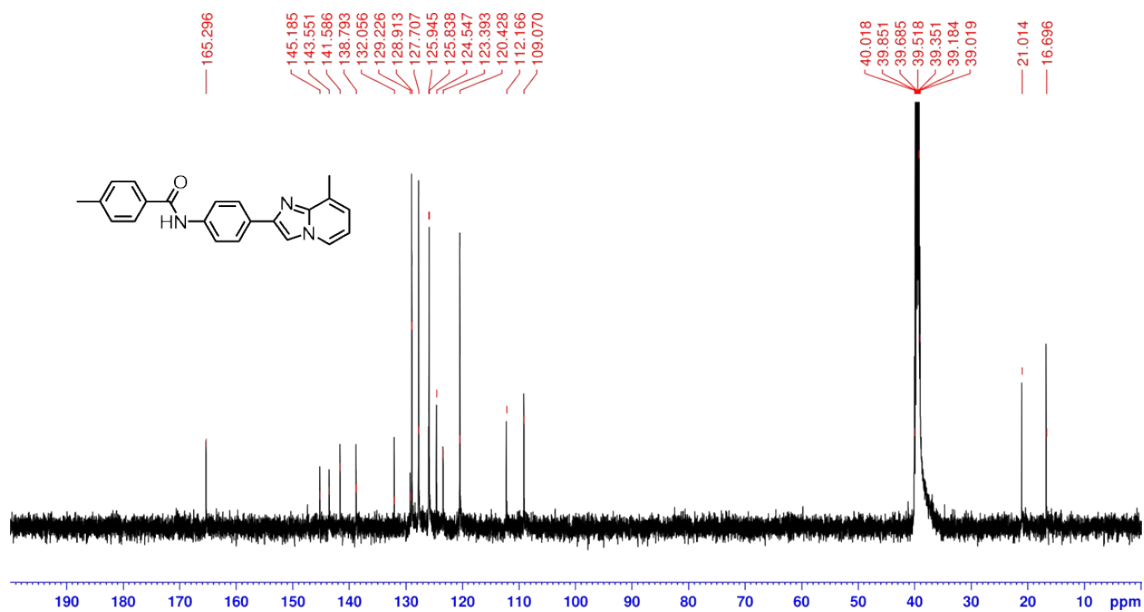

$^1\text{H}$  NMR (500 MHz,  $\text{DMSO-}d_6$ ) of **S8**

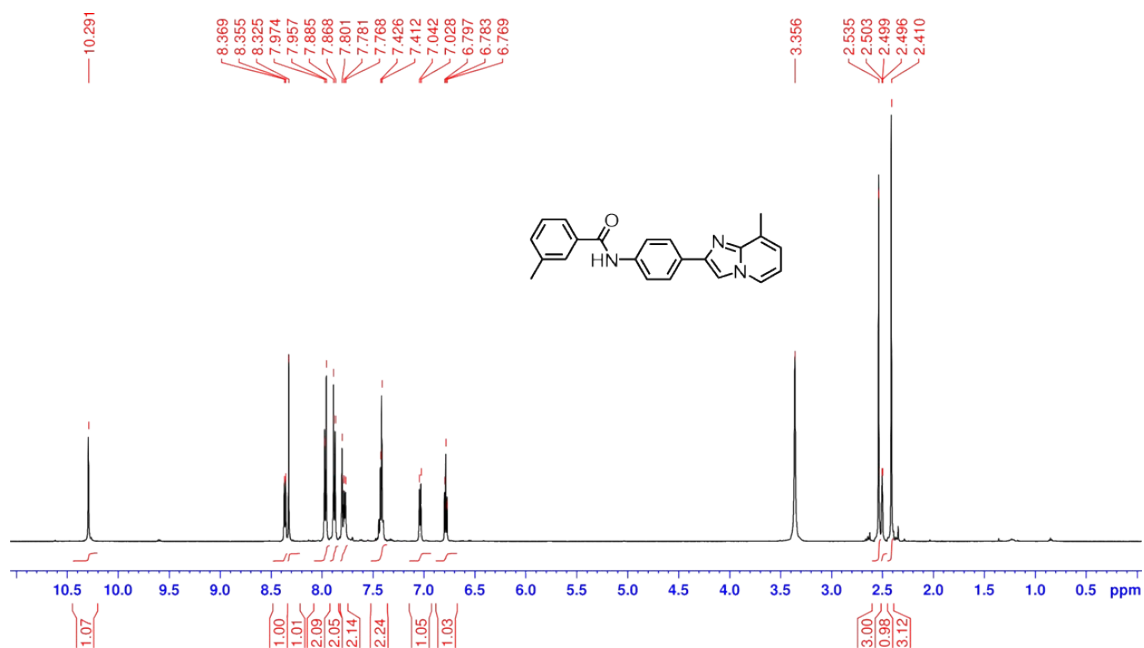

$^{13}\text{C}$  NMR (125 MHz,  $\text{DMSO-}d_6$ ) of **S8**

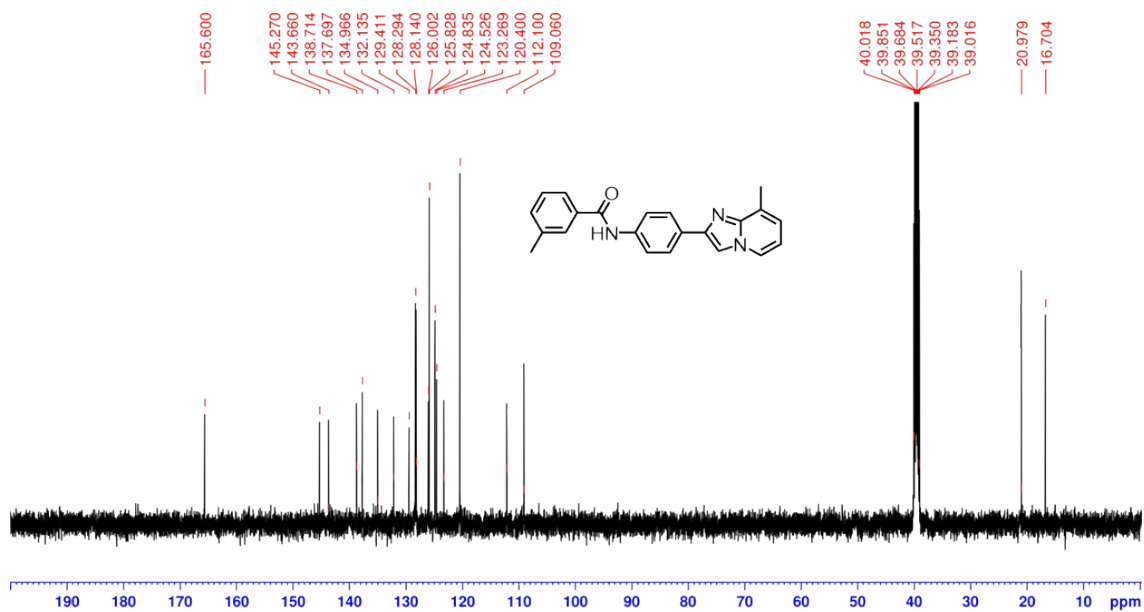

$^1\text{H}$  NMR (500 MHz,  $\text{DMSO-}d_6$ ) of **S9**

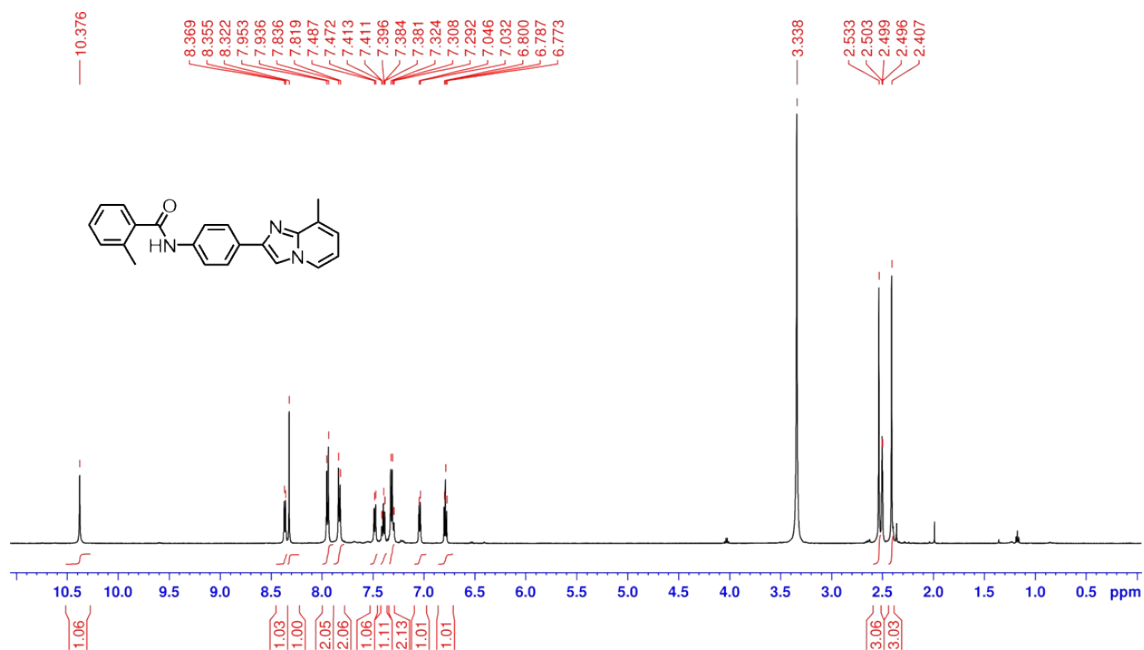

$^{13}\text{C}$  NMR (125 MHz,  $\text{DMSO-}d_6$ ) of **S9**

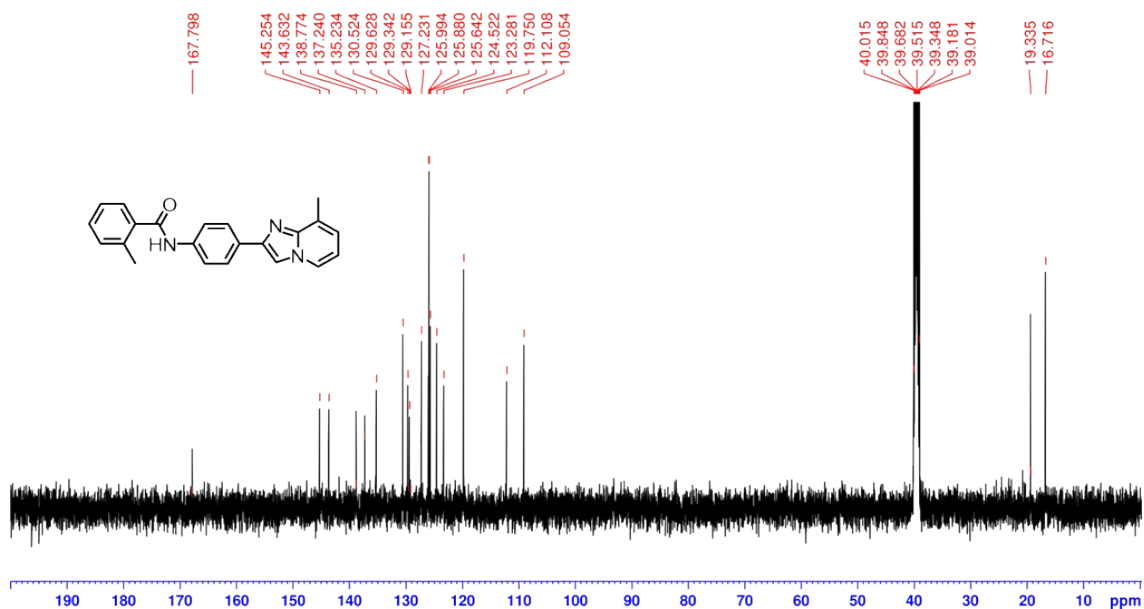

$^1\text{H}$  NMR (500 MHz,  $\text{DMSO}-d_6$ ) of **S10**

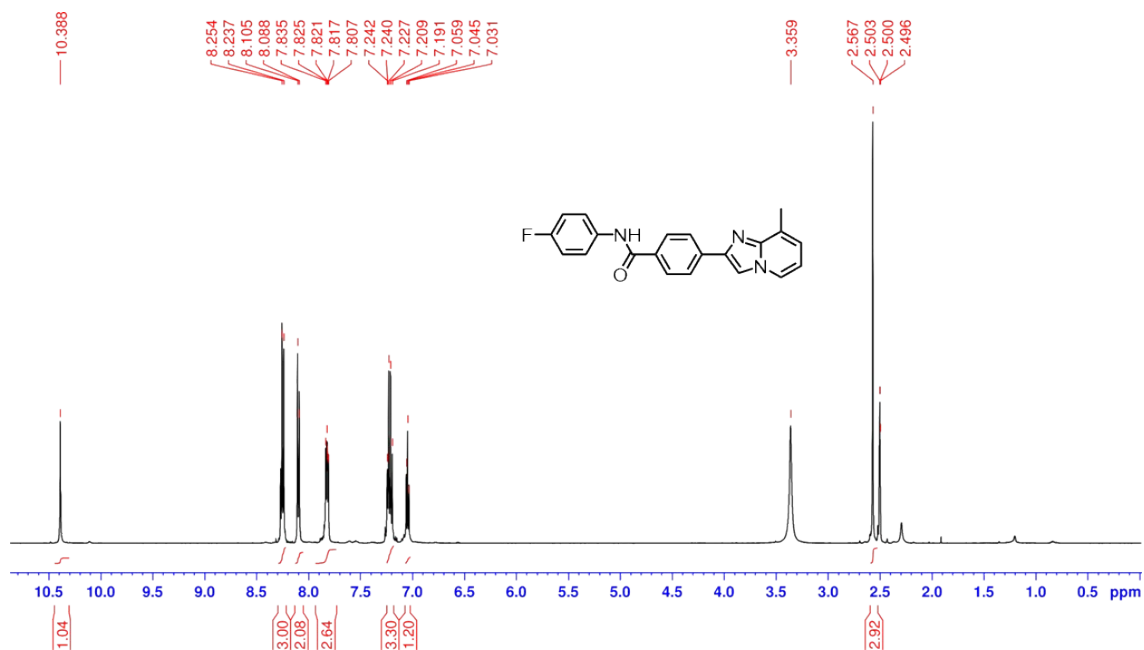

$^{13}\text{C}$  NMR (125 MHz,  $\text{DMSO}-d_6$ ) of **S10**

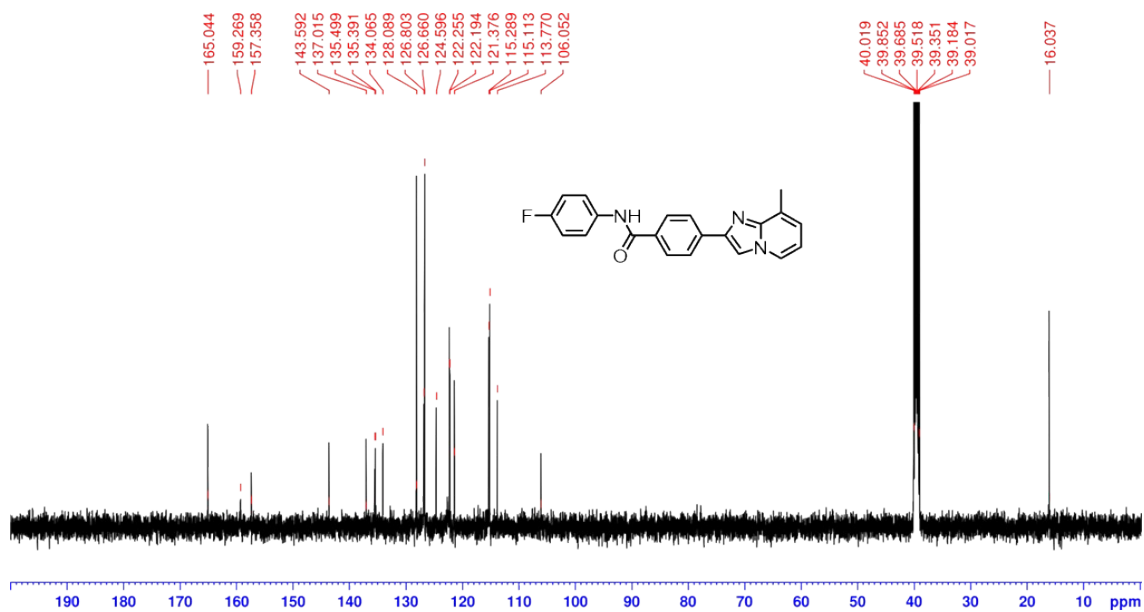

$^1\text{H}$  NMR (500 MHz,  $\text{DMSO}-d_6$ ) of **S11**

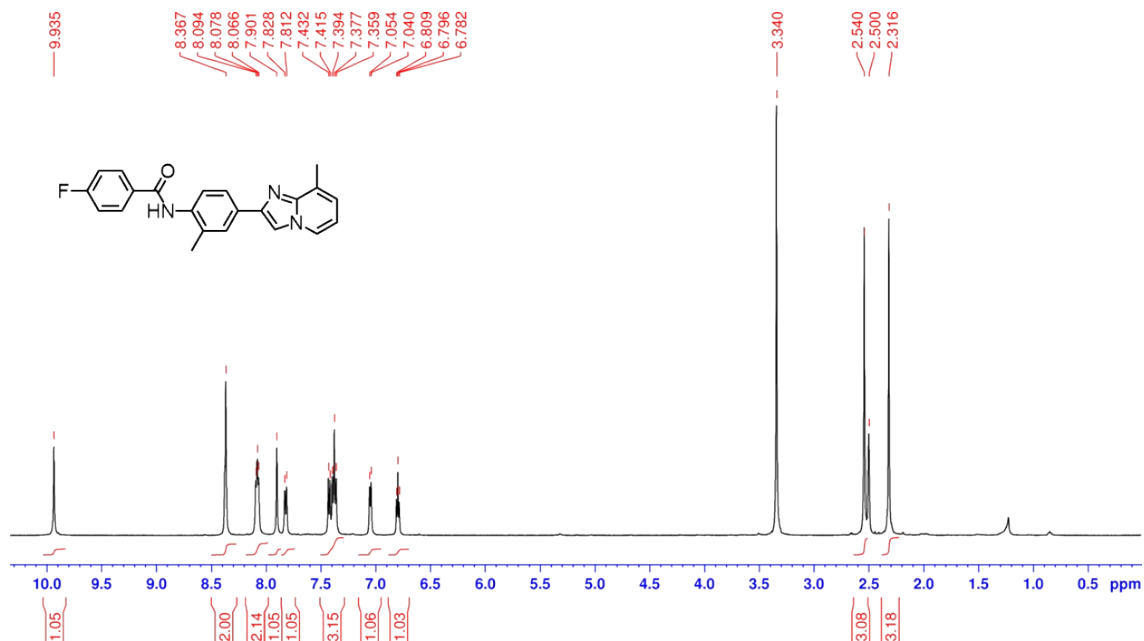

$^{13}\text{C}$  NMR (125 MHz,  $\text{DMSO}-d_6$ ) of **S11**

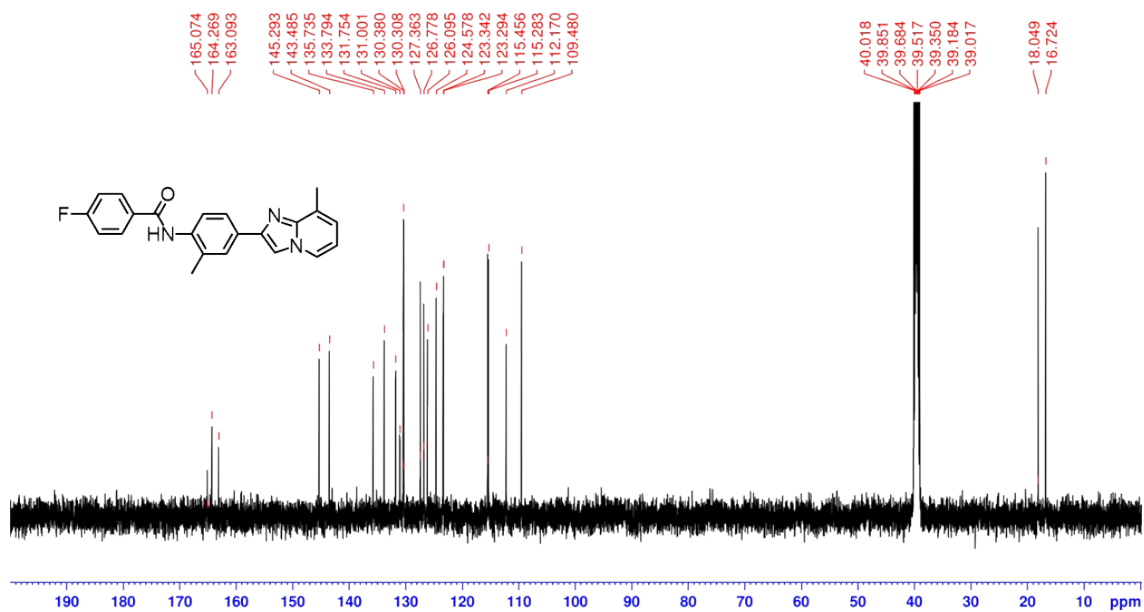



<sup>1</sup>H NMR (500 MHz, DMSO-*d*<sub>6</sub>) of **S12**

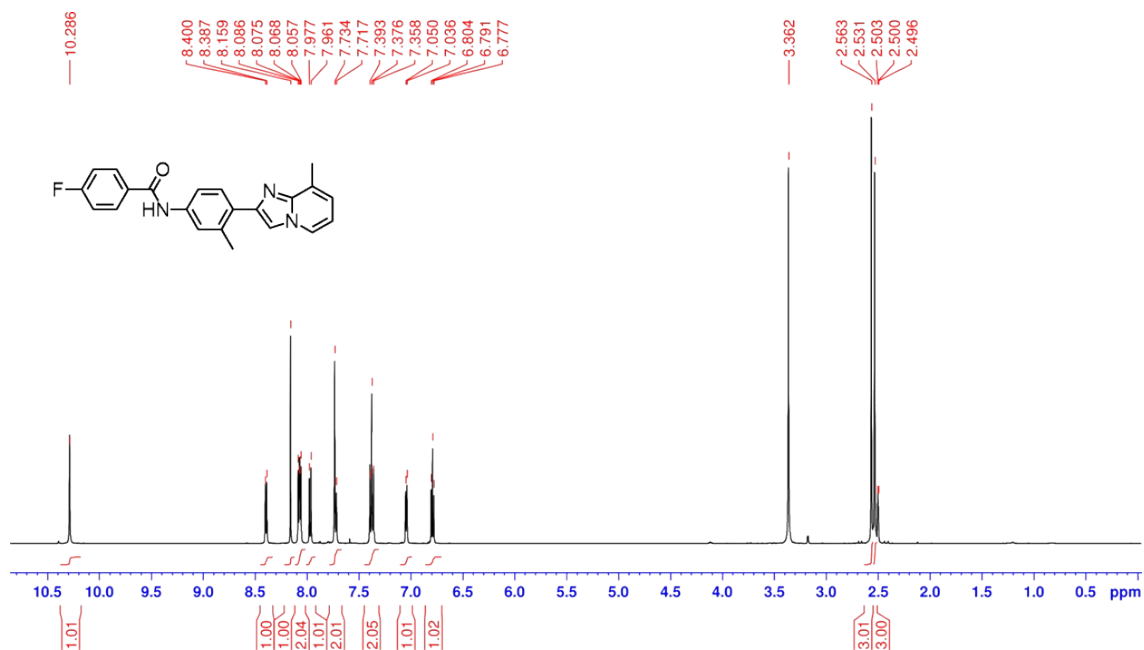

<sup>13</sup>C NMR (125 MHz, DMSO-*d*<sub>6</sub>) of **S12**

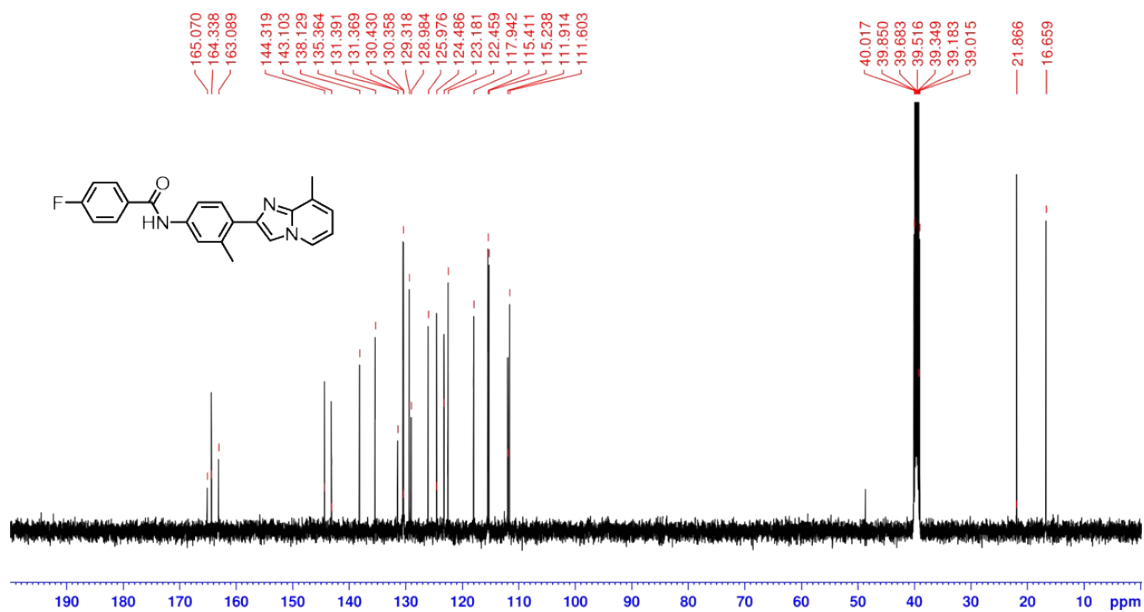

$^1\text{H}$  NMR (500 MHz,  $\text{DMSO-}d_6$ ) of **S13**

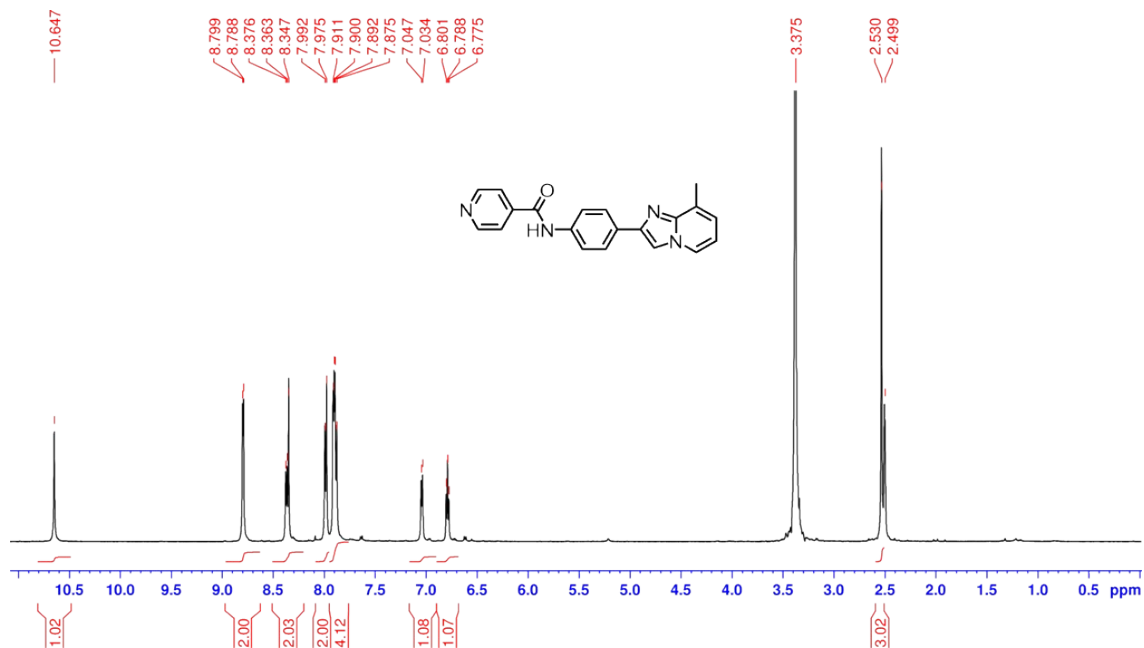

$^{13}\text{C}$  NMR (125 MHz,  $\text{DMSO-}d_6$ ) of **S13**

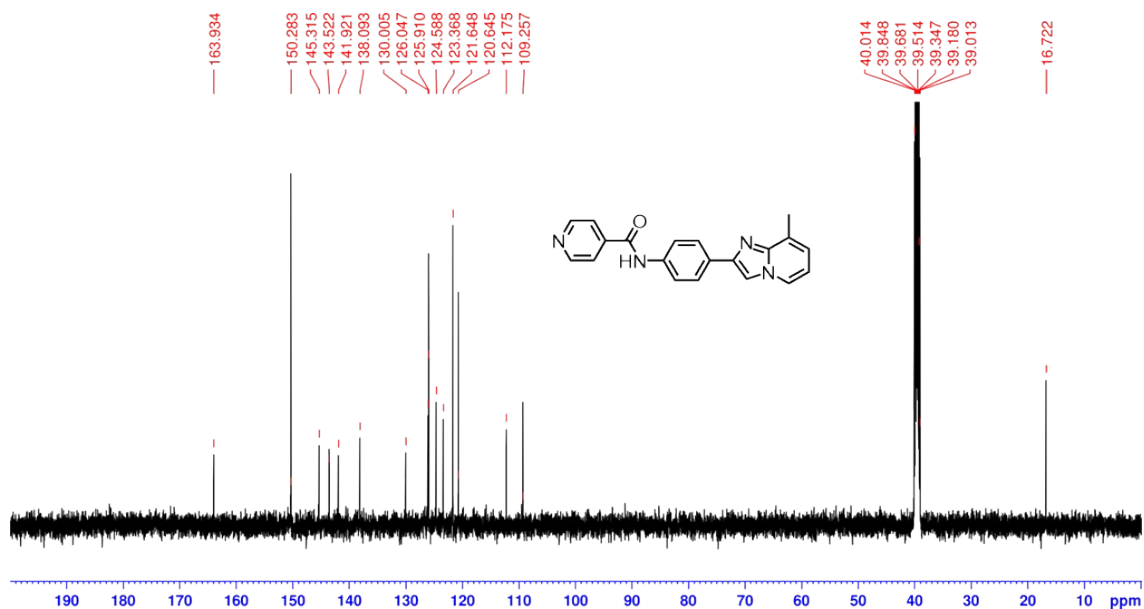

<sup>1</sup>H NMR (500 MHz, DMSO-*d*<sub>6</sub>) of S14

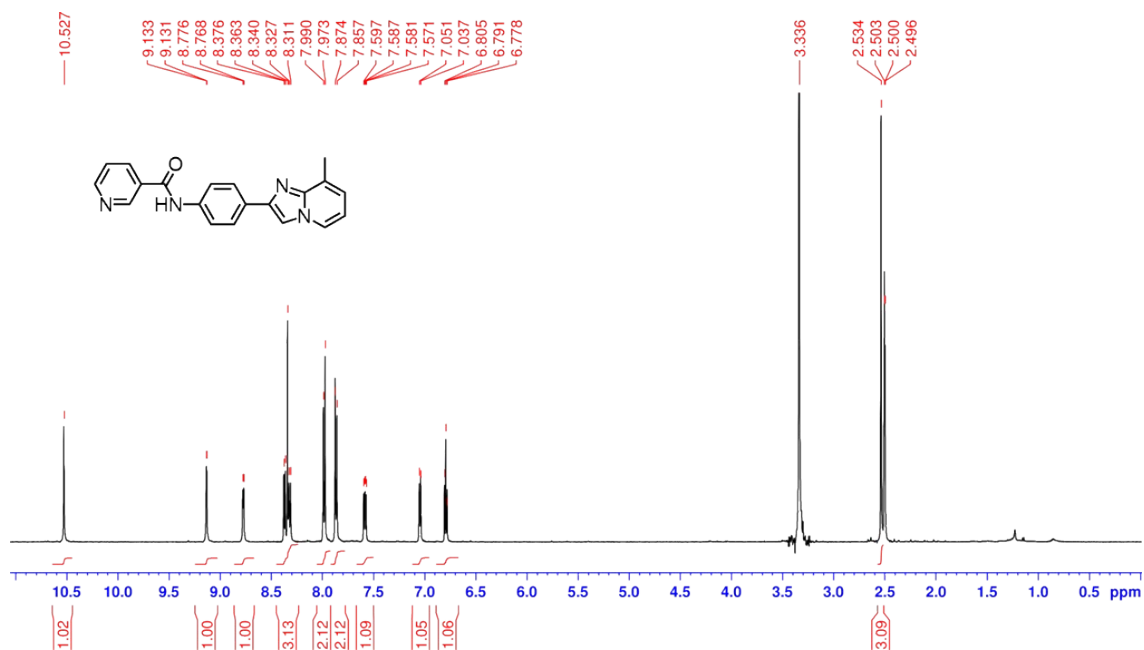

<sup>13</sup>C NMR (125 MHz, DMSO-*d*<sub>6</sub>) of S14

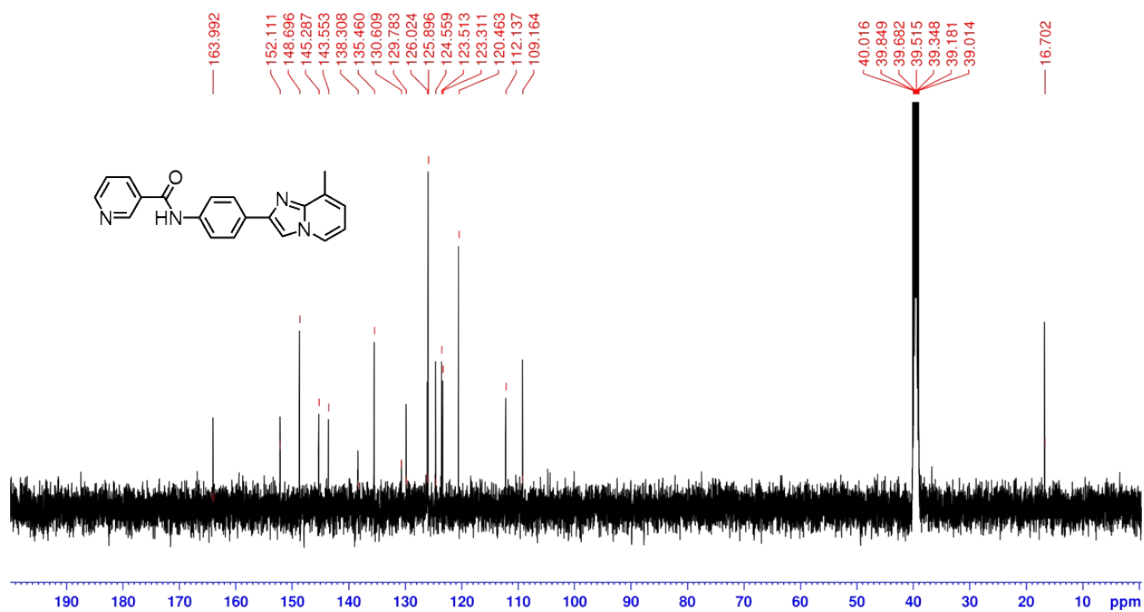

$^1\text{H}$  NMR (500 MHz,  $\text{DMSO}-d_6$ ) of **S15**

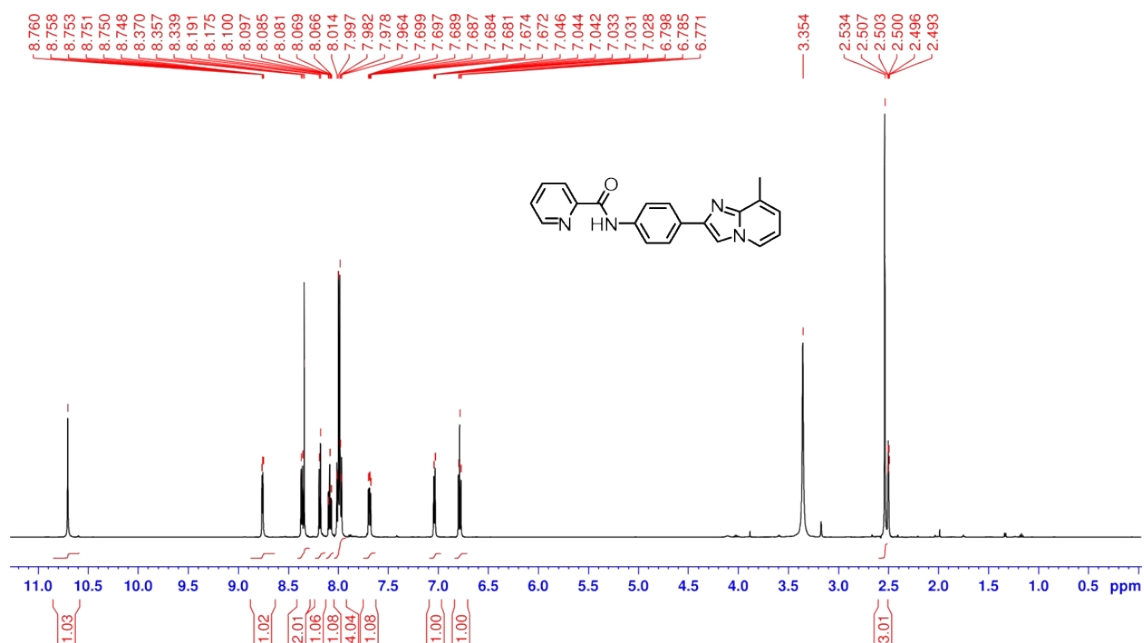

$^{13}\text{C}$  NMR (125 MHz,  $\text{DMSO}-d_6$ ) of **S15**

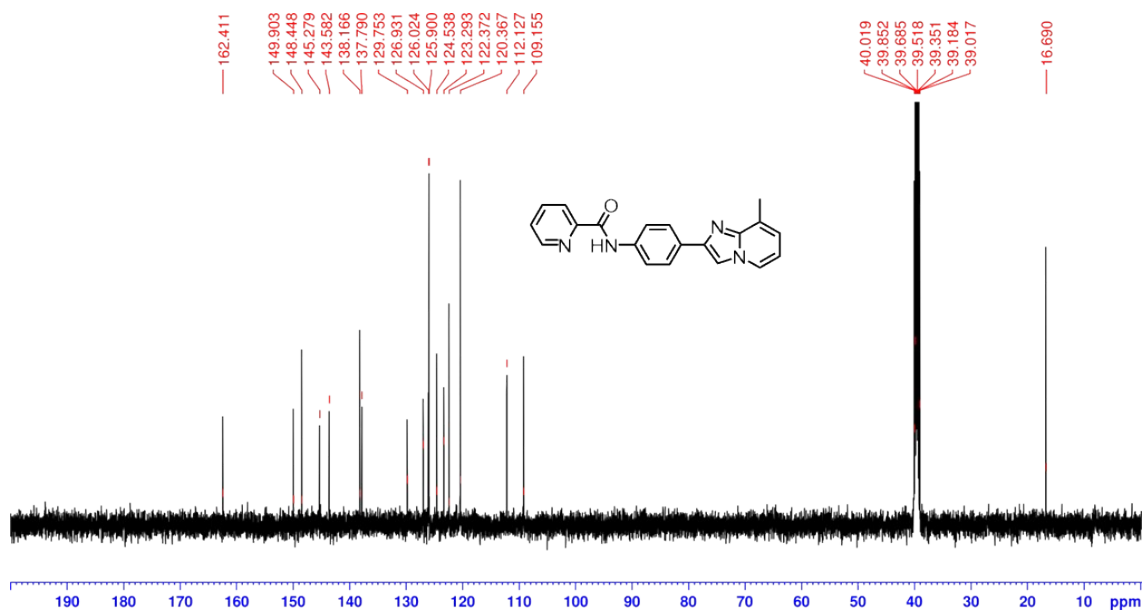

<sup>1</sup>H NMR (500 MHz, DMSO-*d*<sub>6</sub>) of S16

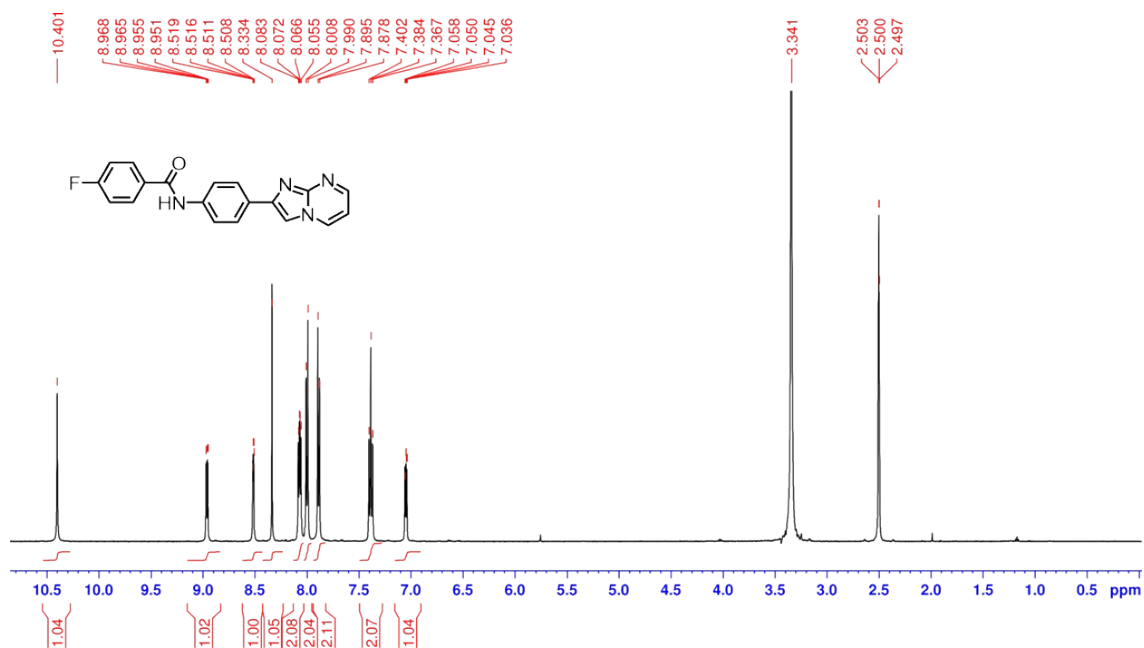

<sup>13</sup>C NMR (125 MHz, DMSO-*d*<sub>6</sub>) of S16

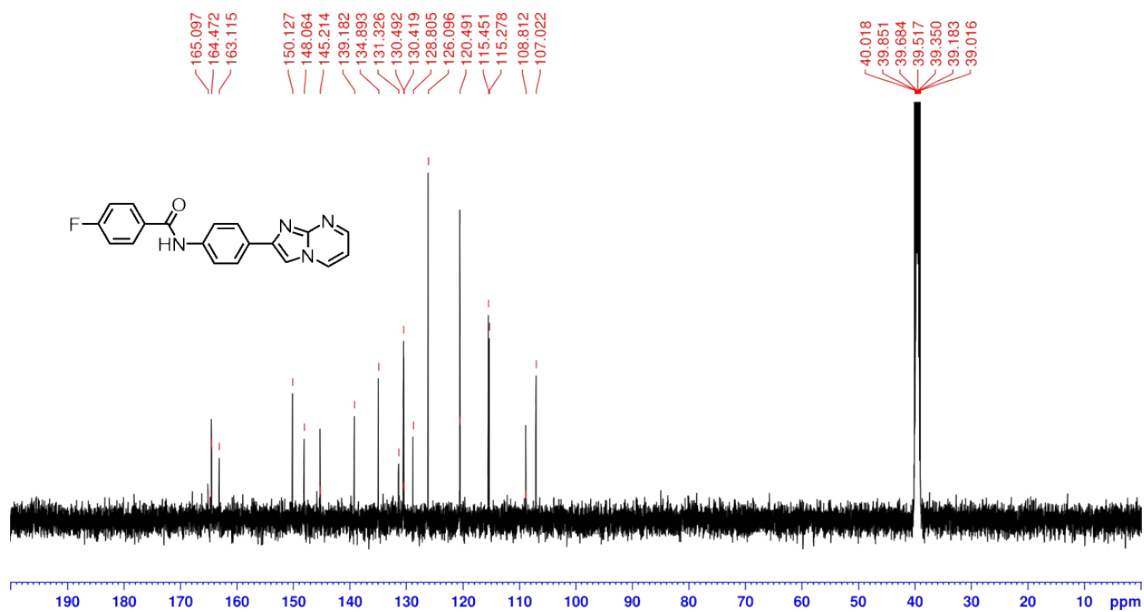

$^1\text{H}$  NMR (500 MHz,  $\text{DMSO-}d_6$ ) of **S17**

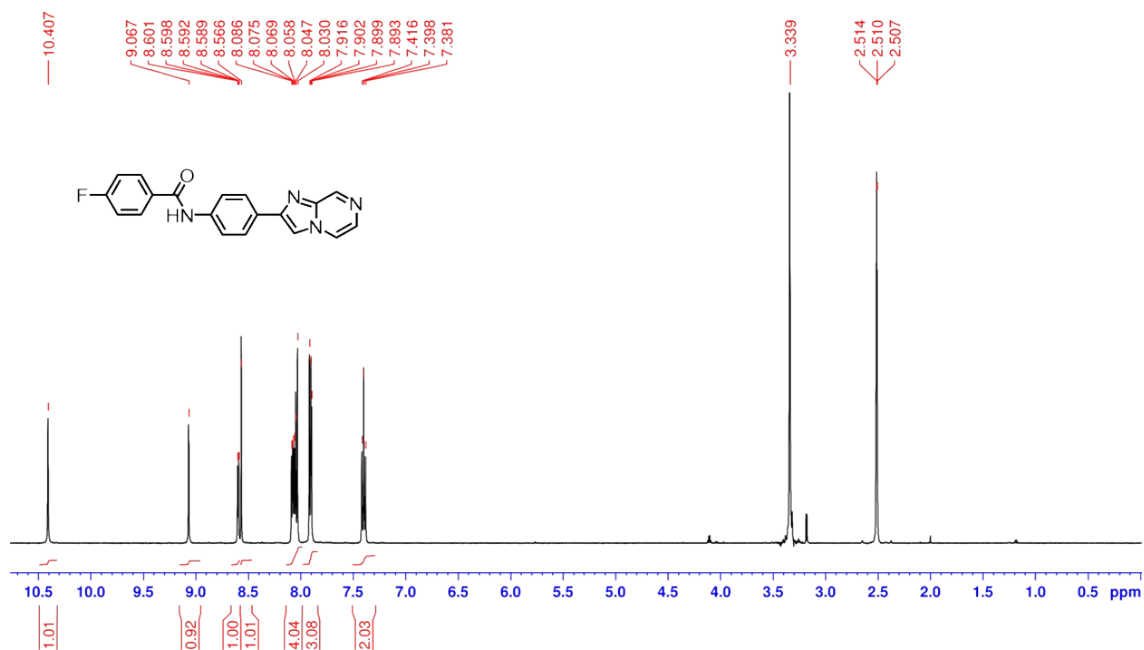

$^{13}\text{C}$  NMR (125 MHz,  $\text{DMSO-}d_6$ ) of **S17**

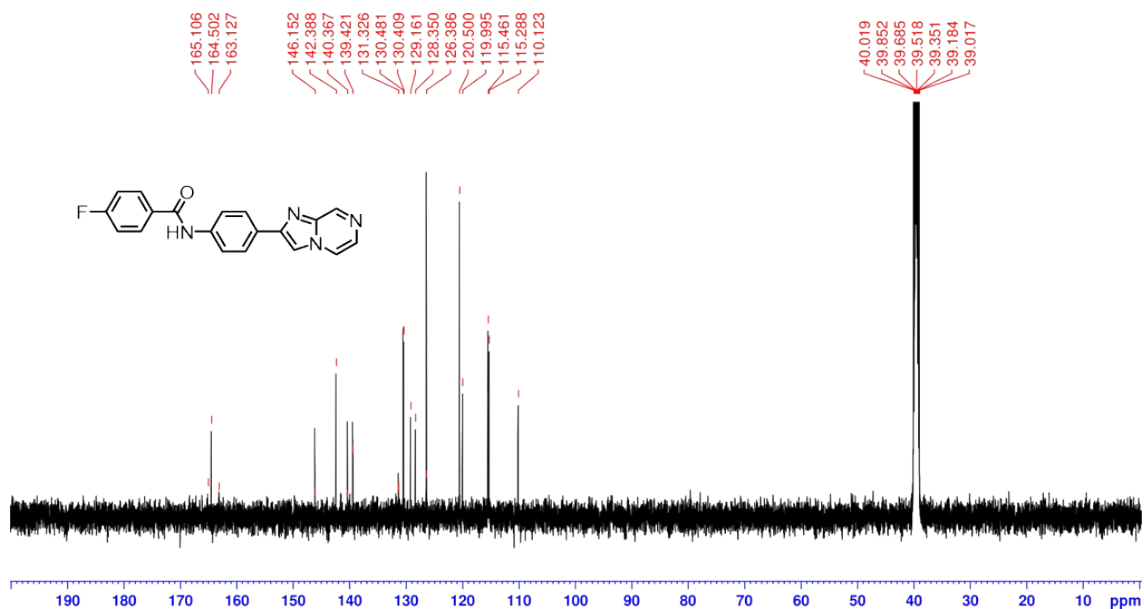

<sup>1</sup>H NMR (500 MHz, DMSO-*d*<sub>6</sub>) of **S18**

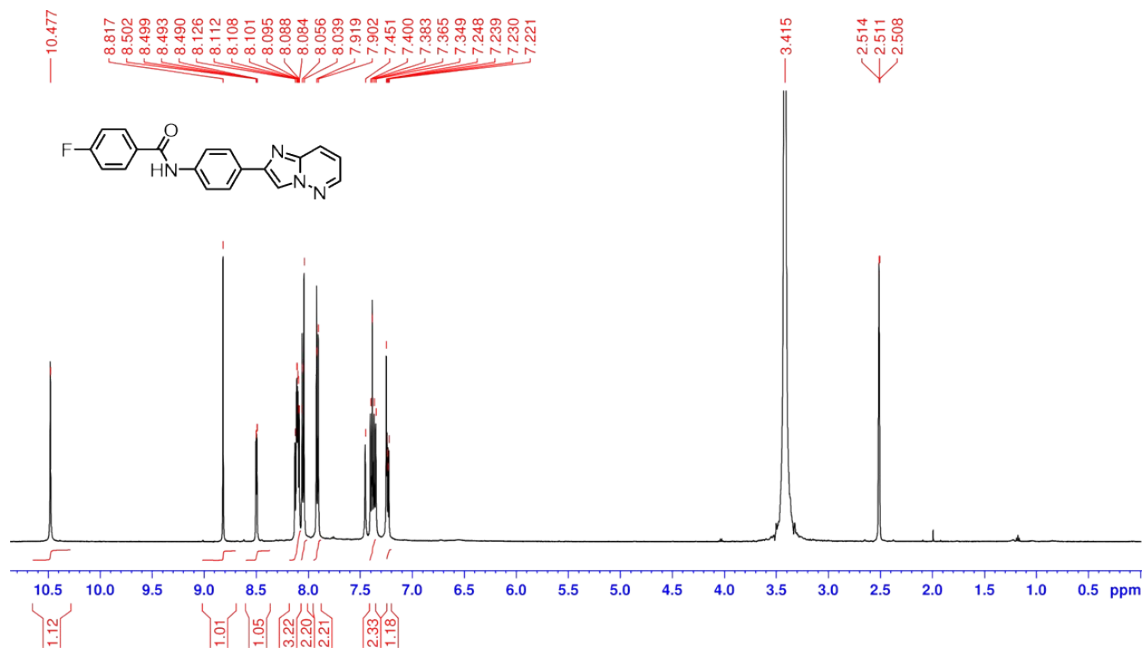

<sup>13</sup>C NMR (125 MHz, DMSO-*d*<sub>6</sub>) of **S18**

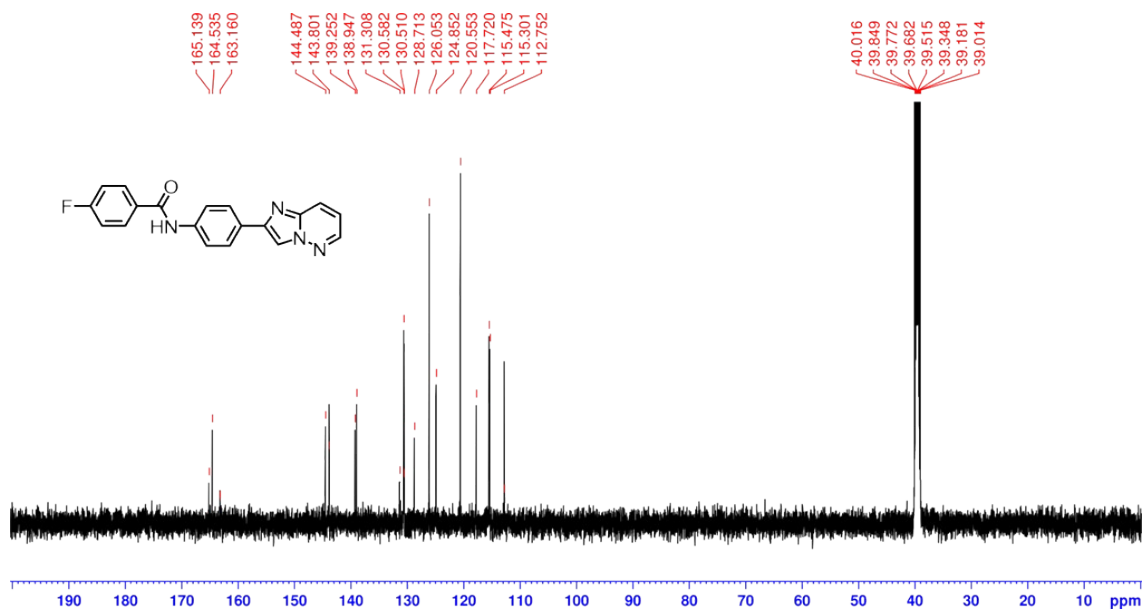

$^1\text{H}$  NMR (500 MHz,  $\text{DMSO-}d_6$ ) of **S19**

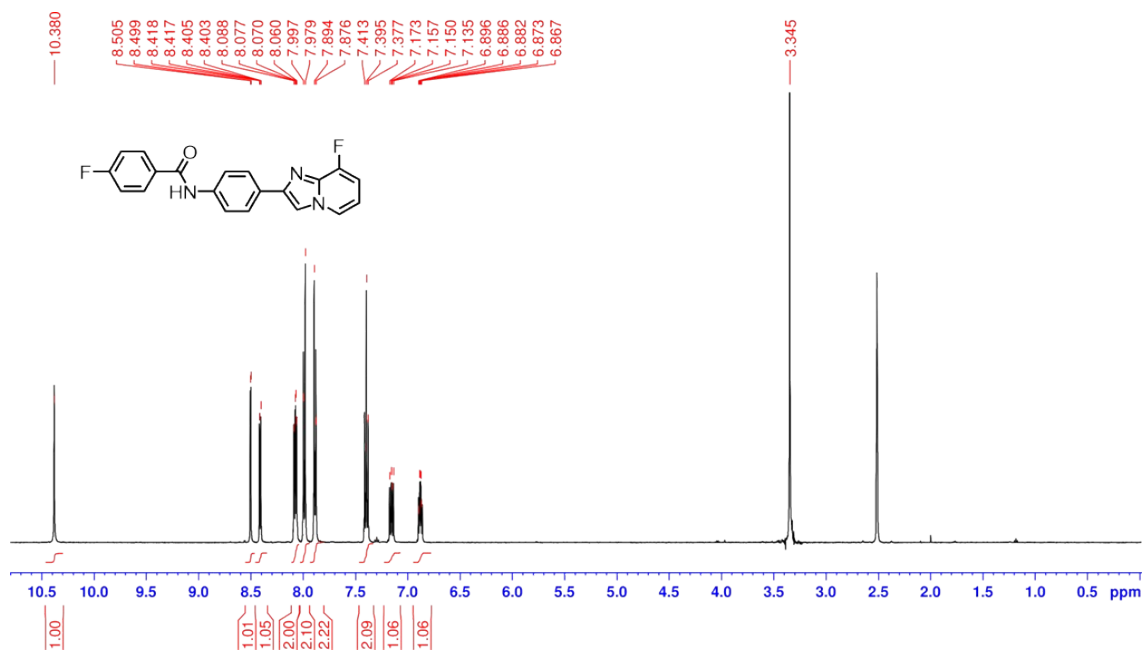

$^{13}\text{C}$  NMR (125 MHz,  $\text{DMSO-}d_6$ ) of **S19**

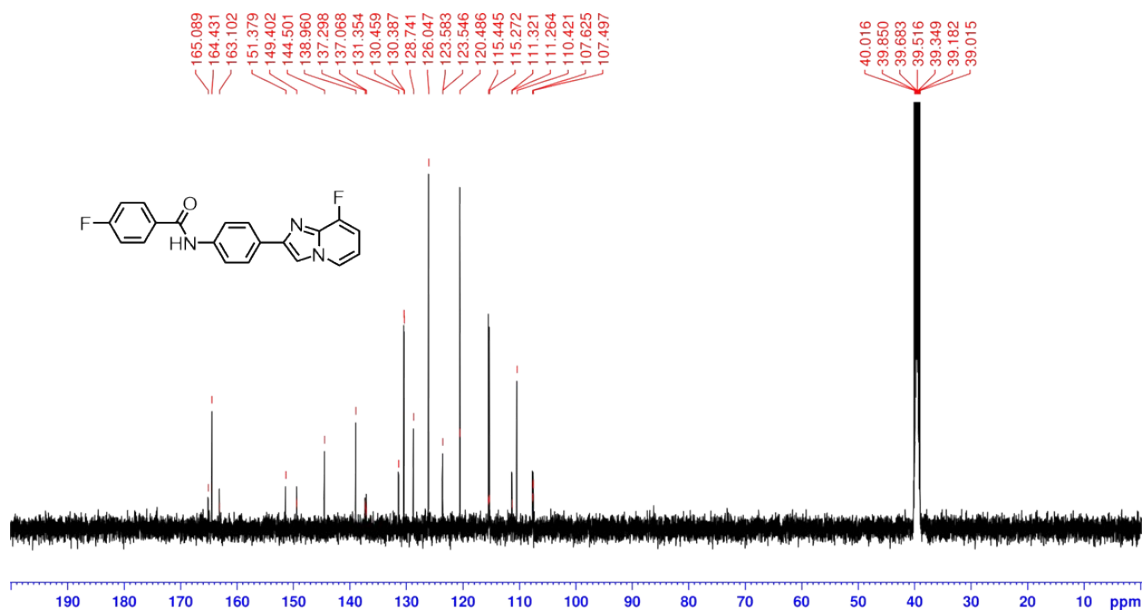



<sup>1</sup>H NMR (500 MHz, DMSO-*d*<sub>6</sub>) of **S20**

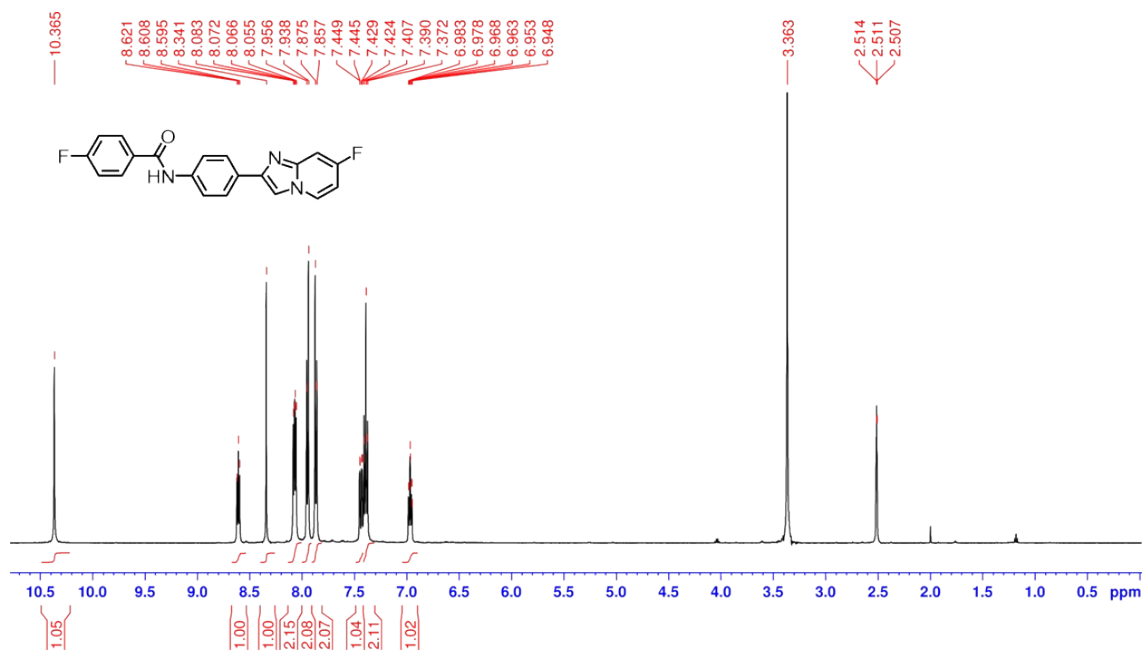

<sup>13</sup>C NMR (125 MHz, DMSO-*d*<sub>6</sub>) of **S20**

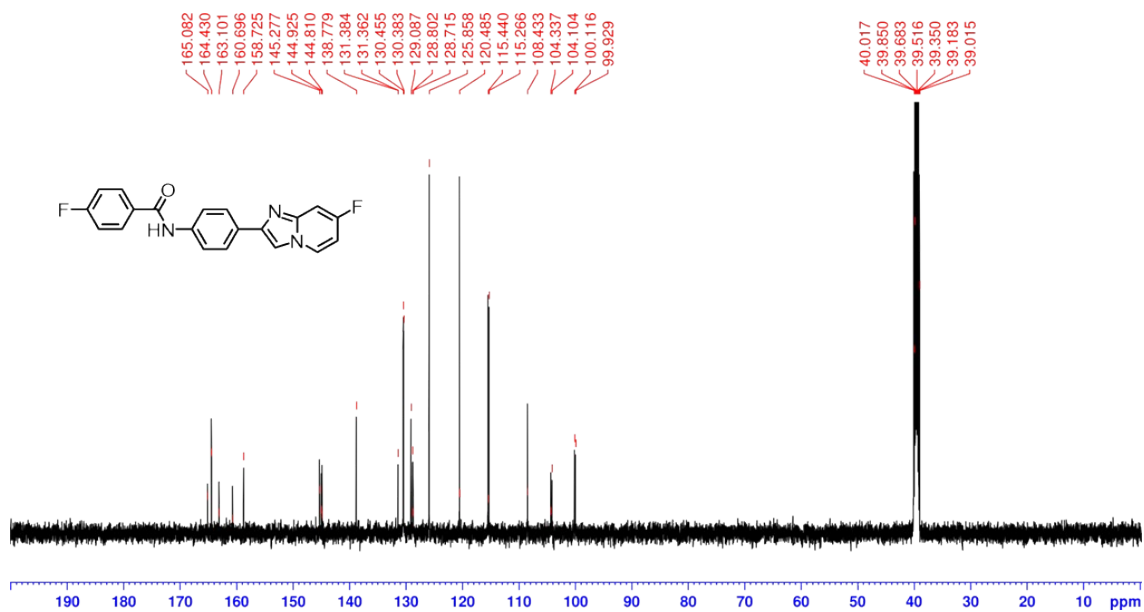

$^1\text{H}$  NMR (500 MHz,  $\text{DMSO}-d_6$ ) of **S21**

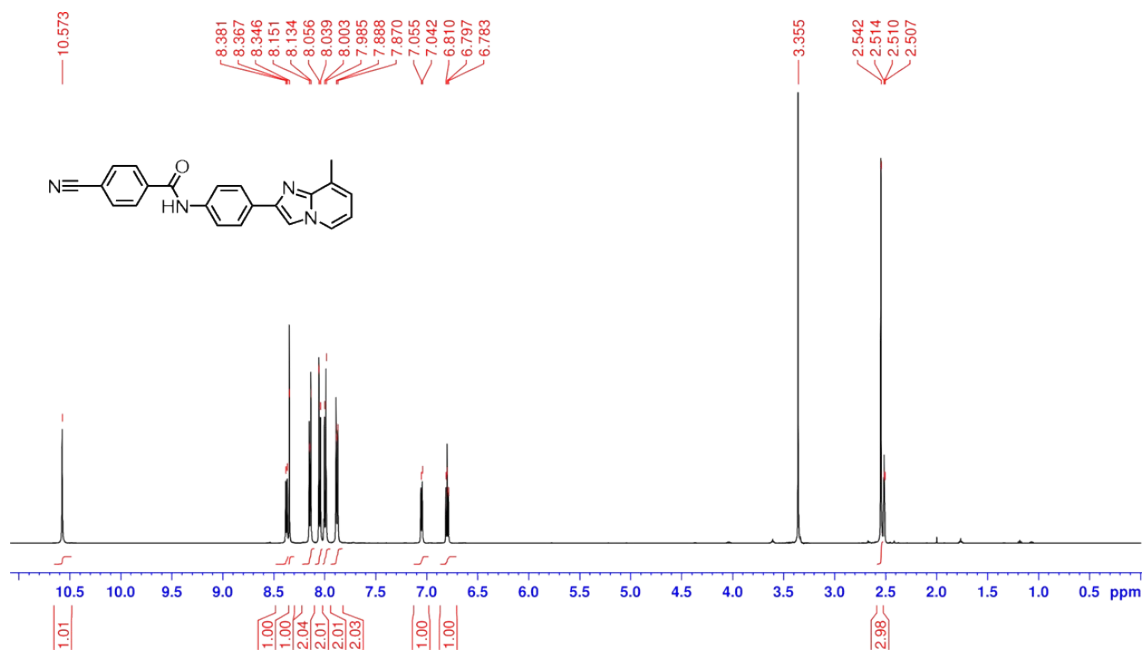

$^{13}\text{C}$  NMR (125 MHz,  $\text{DMSO}-d_6$ ) of **S21**

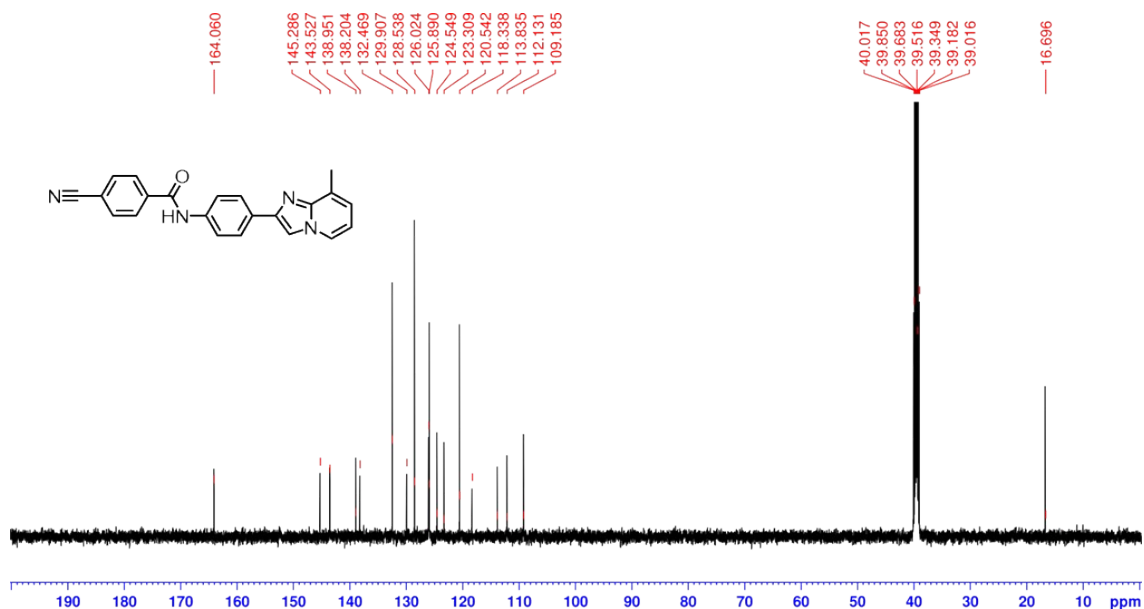

$^1\text{H}$  NMR (500 MHz,  $\text{DMSO-}d_6$ ) of **S22**

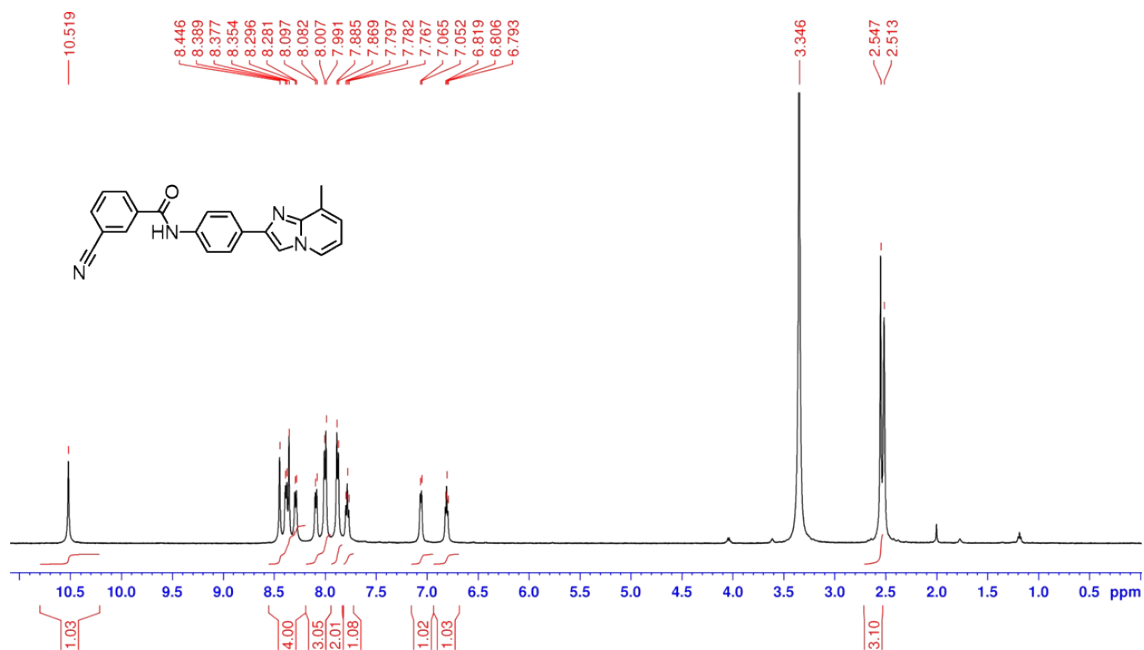

$^{13}\text{C}$  NMR (125 MHz,  $\text{DMSO-}d_6$ ) of **S22**

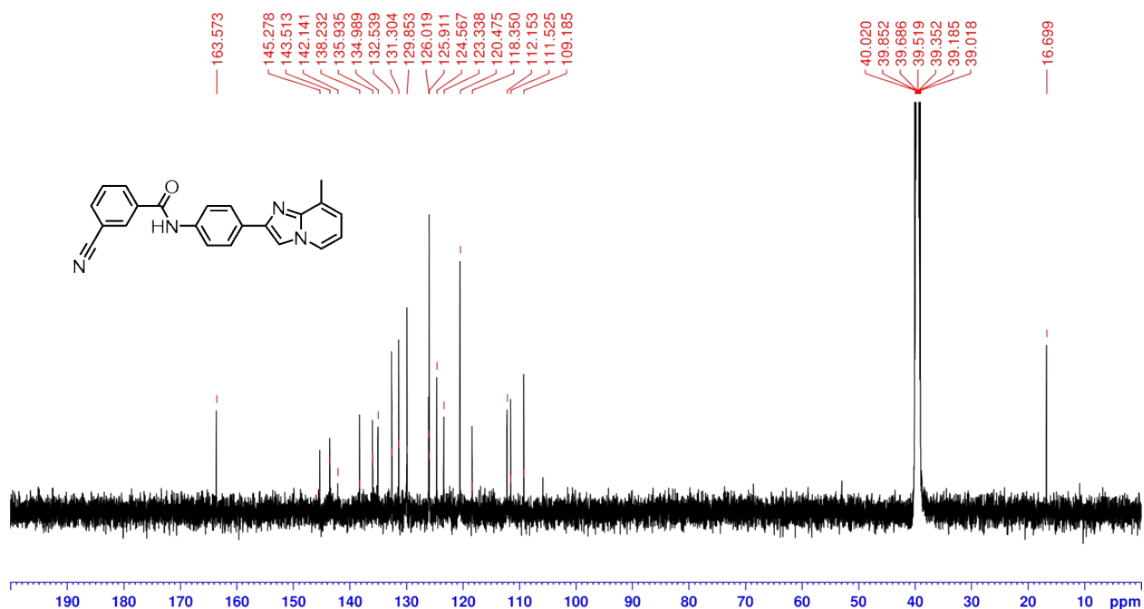

$^1\text{H}$  NMR (500 MHz,  $\text{DMSO}-d_6$ ) of **S23**

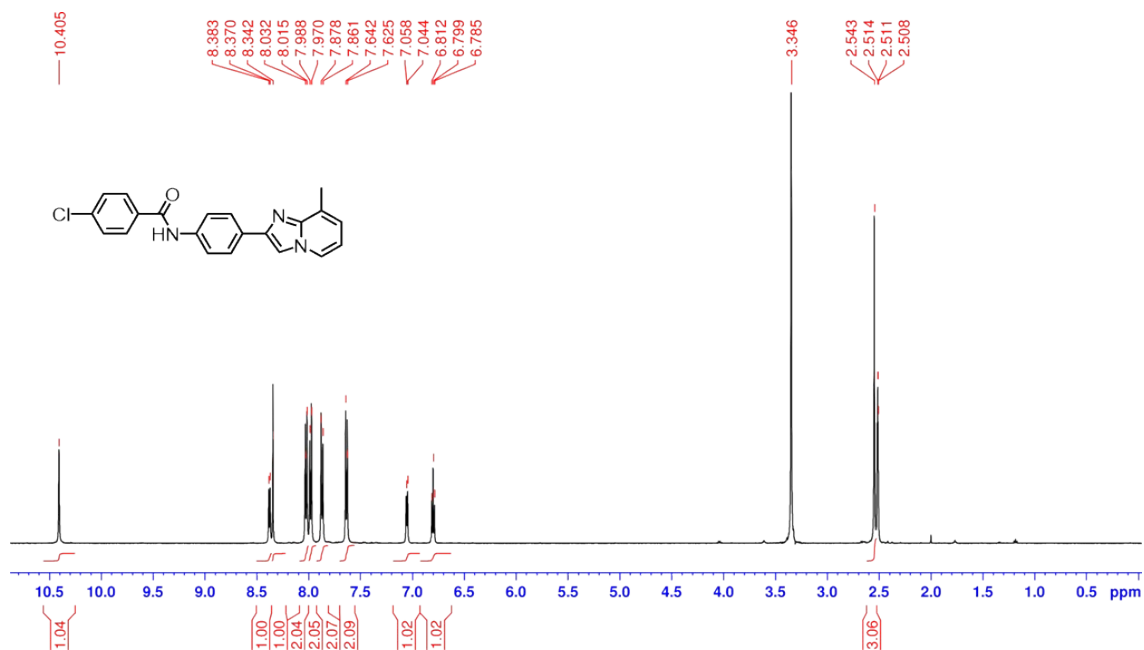

$^{13}\text{C}$  NMR (125 MHz,  $\text{DMSO}-d_6$ ) of **S23**

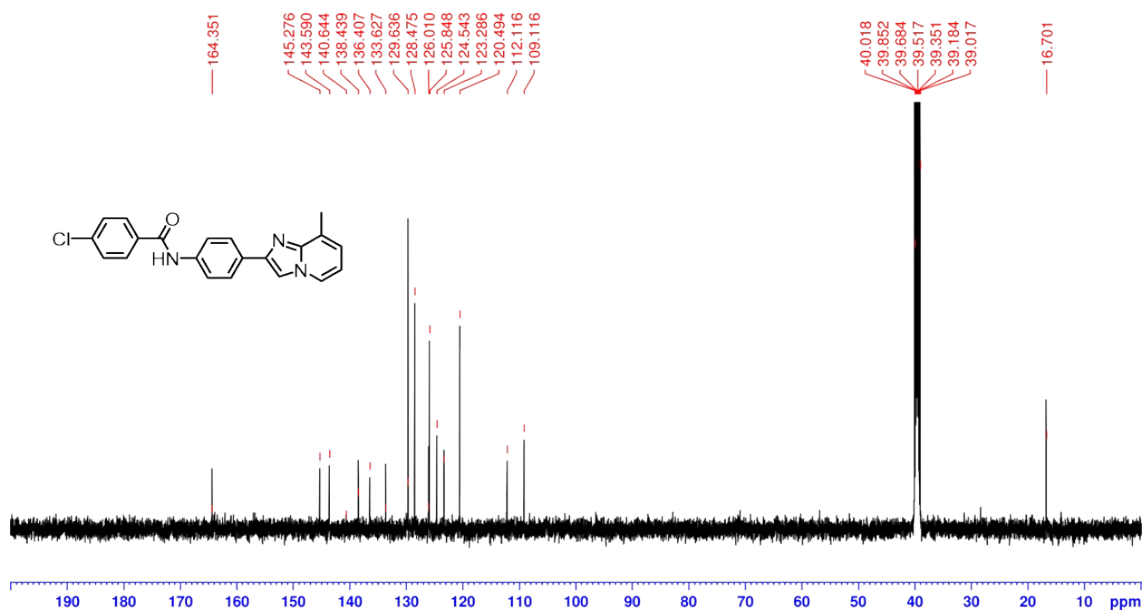

$^1\text{H}$  NMR (500 MHz,  $\text{DMSO}-d_6$ ) of **S24**

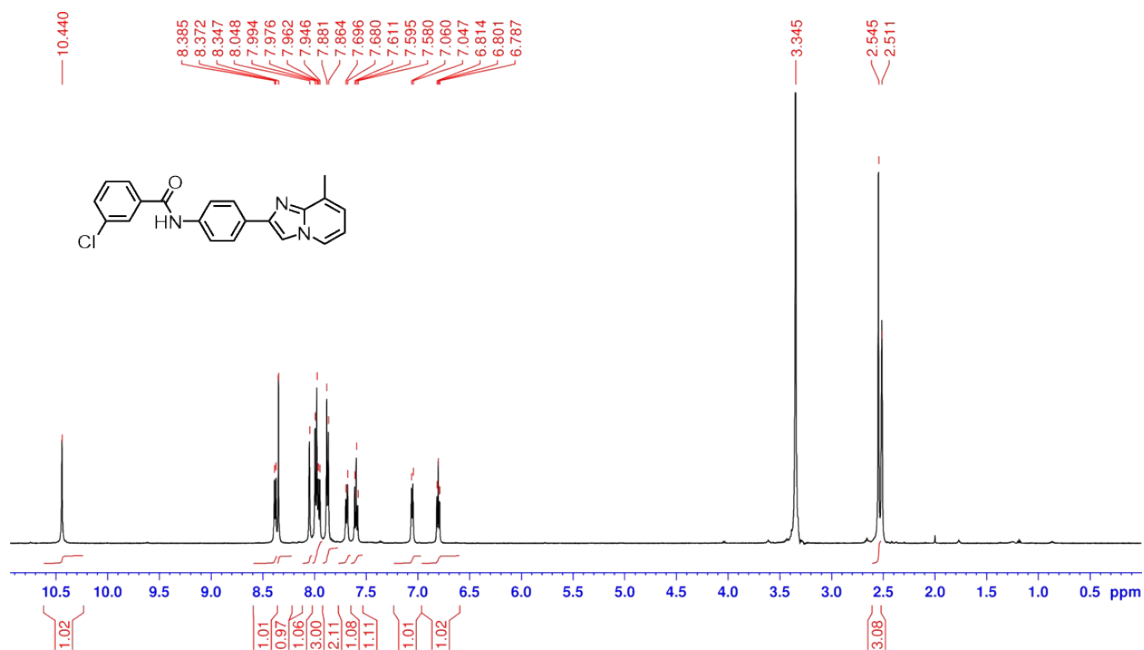

$^{13}\text{C}$  NMR (125 MHz,  $\text{DMSO}-d_6$ ) of **S24**

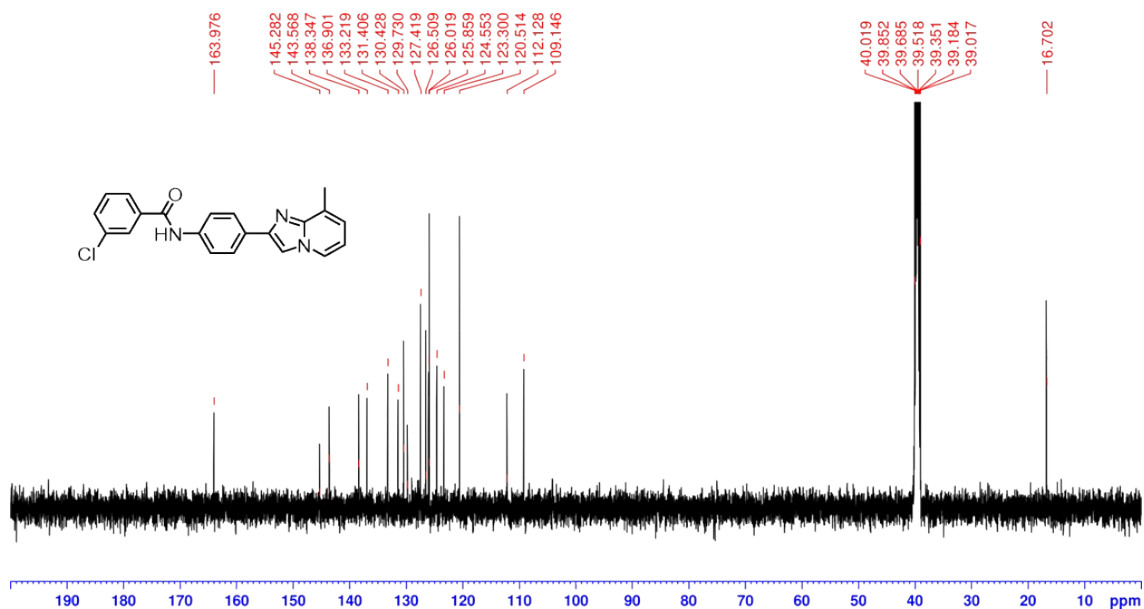

$^1\text{H}$  NMR (500 MHz,  $\text{DMSO}-d_6$ ) of **S25**

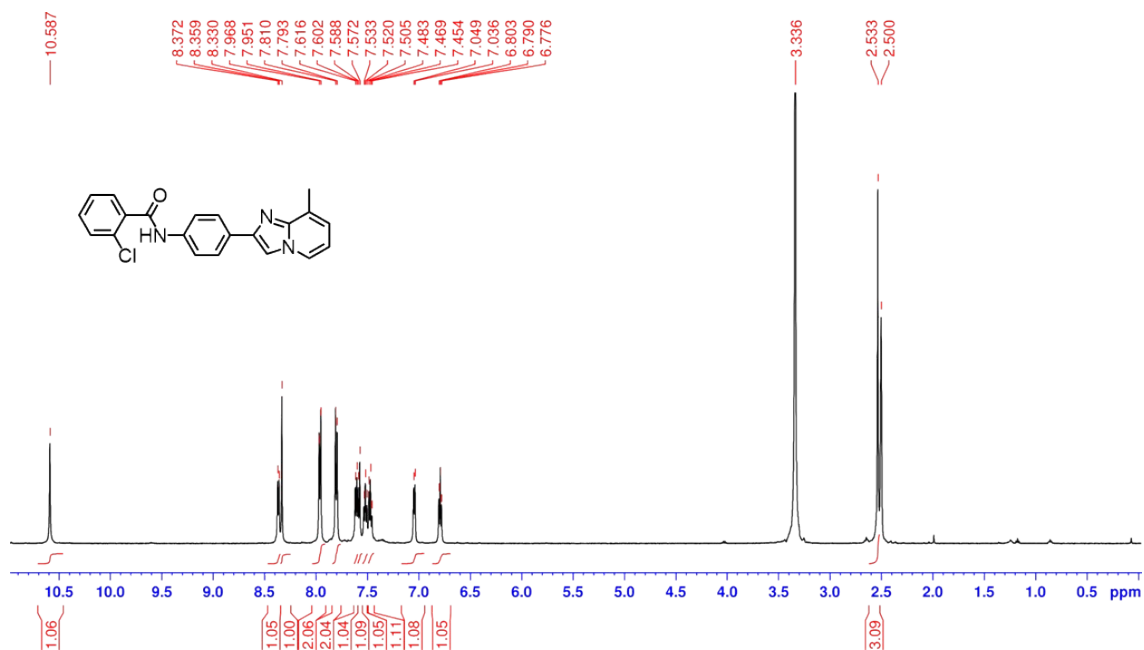

$^{13}\text{C}$  NMR (125 MHz,  $\text{DMSO}-d_6$ ) of **S25**

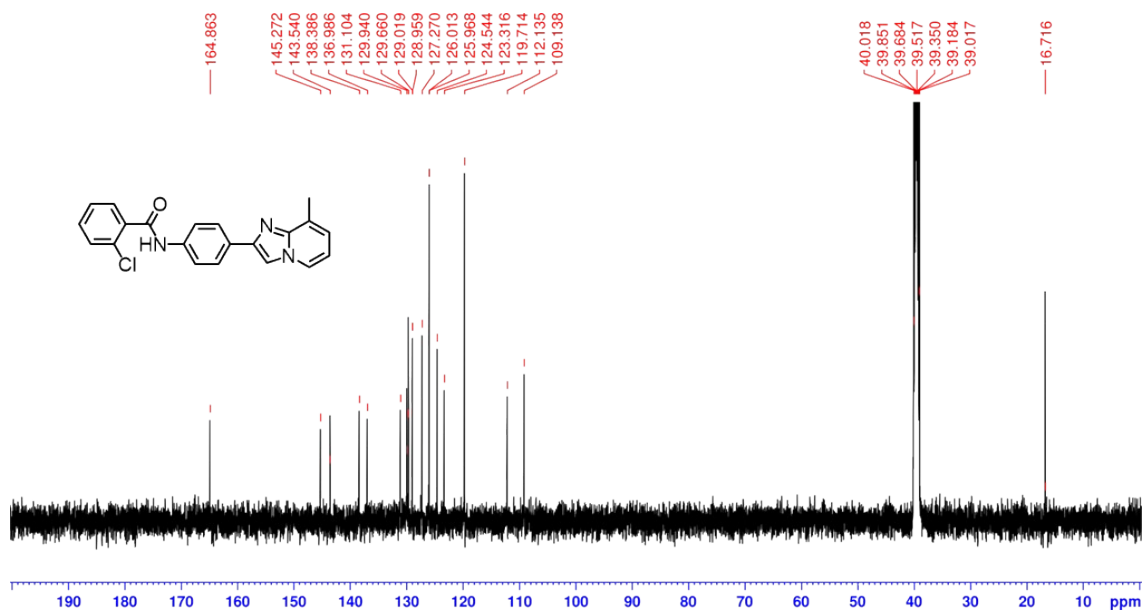

$^1\text{H}$  NMR (500 MHz,  $\text{DMSO}-d_6$ ) of **S26**

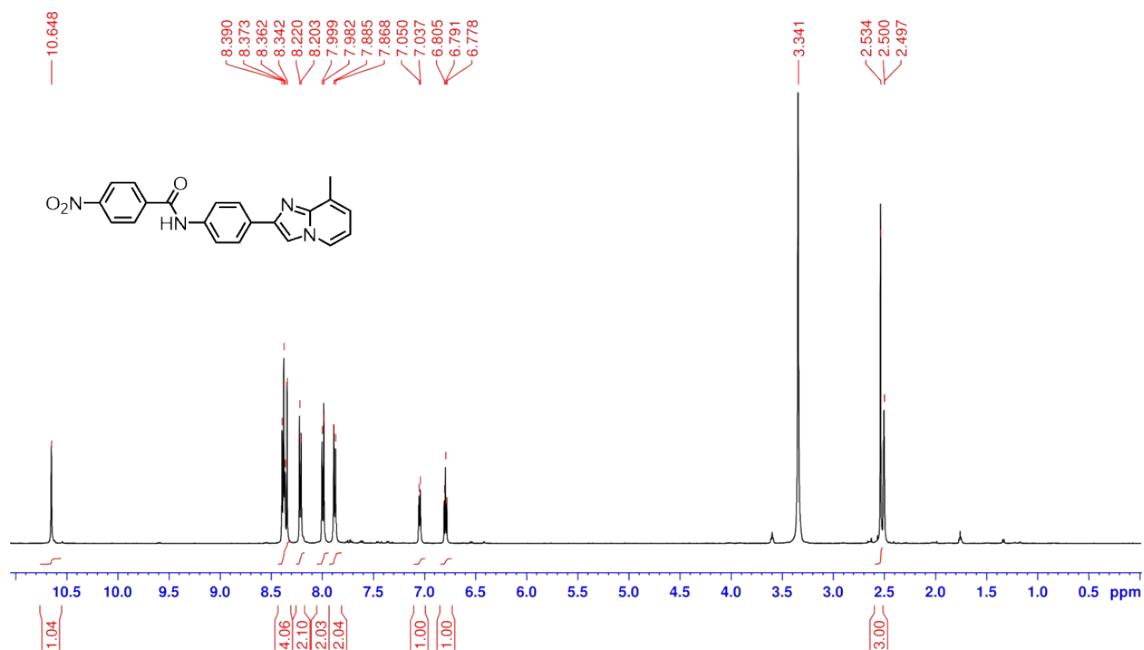

$^{13}\text{C}$  NMR (125 MHz,  $\text{DMSO}-d_6$ ) of **S26**

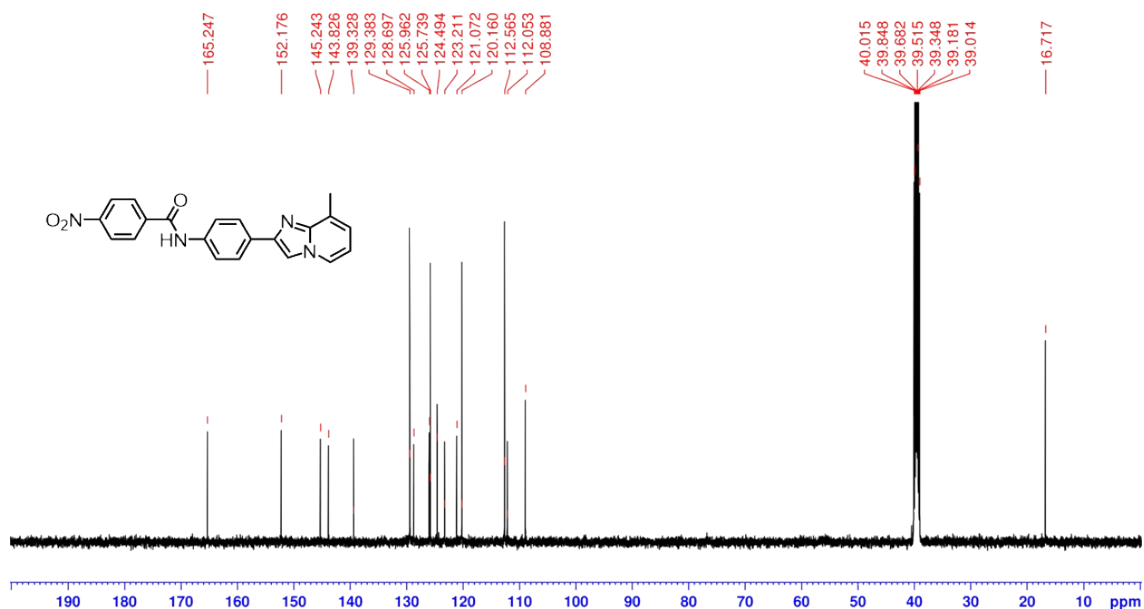

$^1\text{H}$  NMR (500 MHz,  $\text{DMSO}-d_6$ ) of **S27**

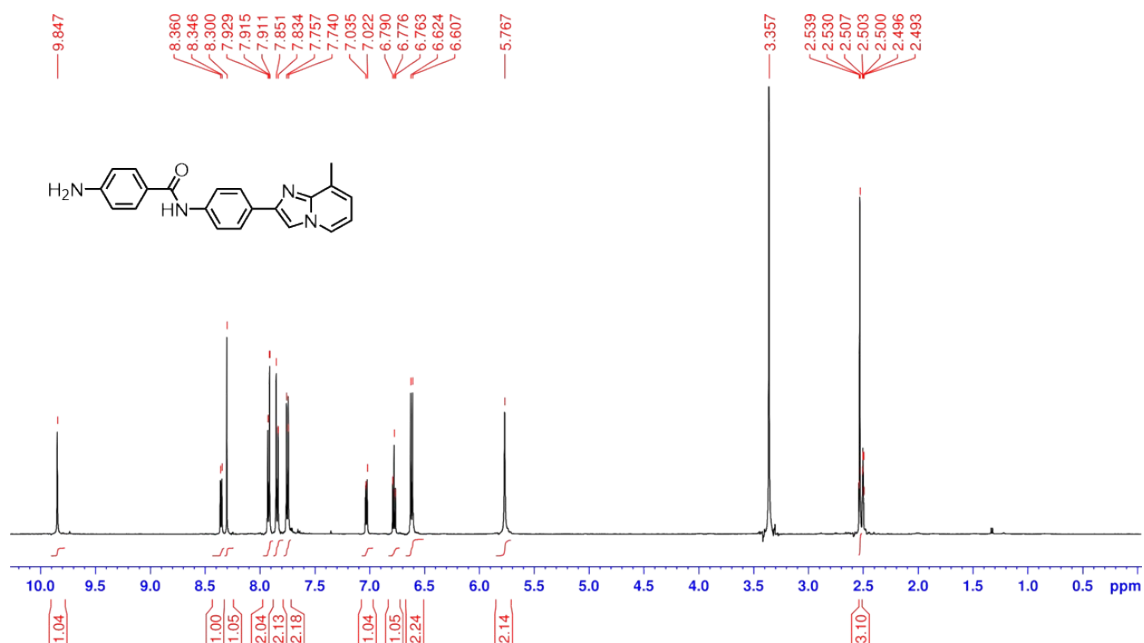

$^{13}\text{C}$  NMR (125 MHz,  $\text{DMSO}-d_6$ ) of **S27**

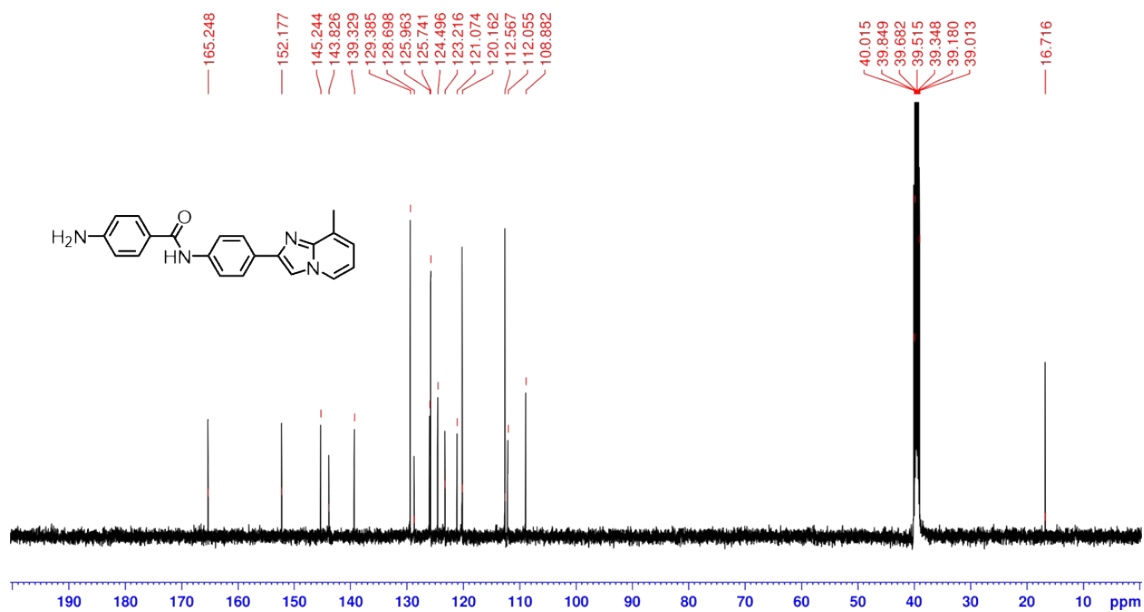



$^1\text{H}$  NMR (500 MHz,  $\text{DMSO-}d_6$ ) of **S28**

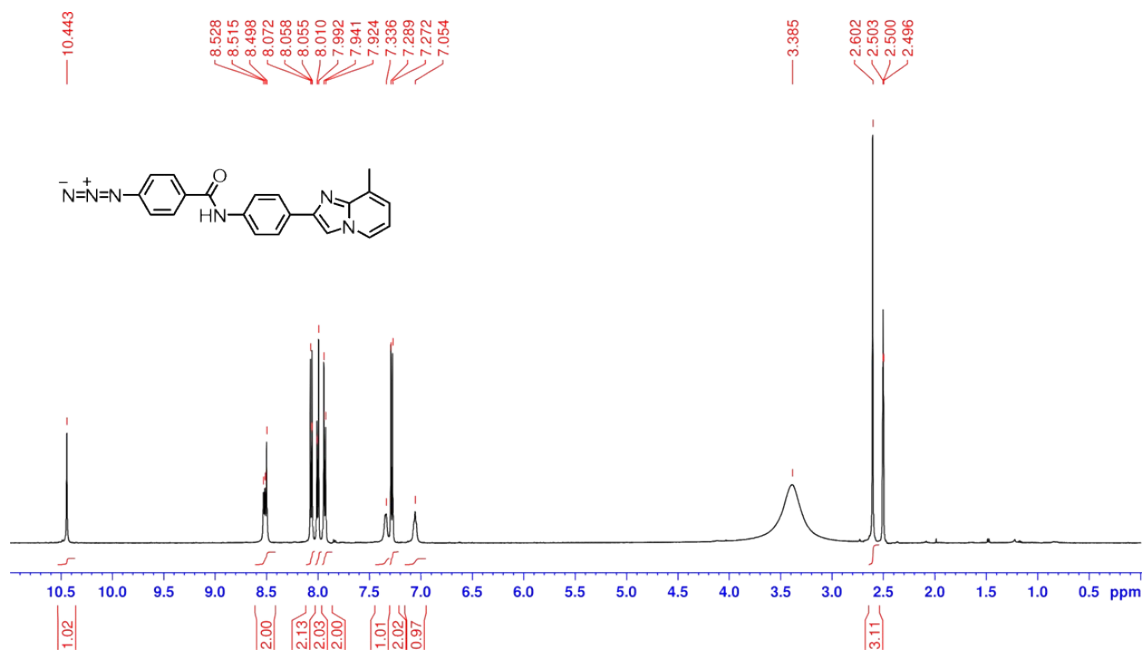

$^{13}\text{C}$  NMR (125 MHz,  $\text{DMSO-}d_6$ ) of **S28**

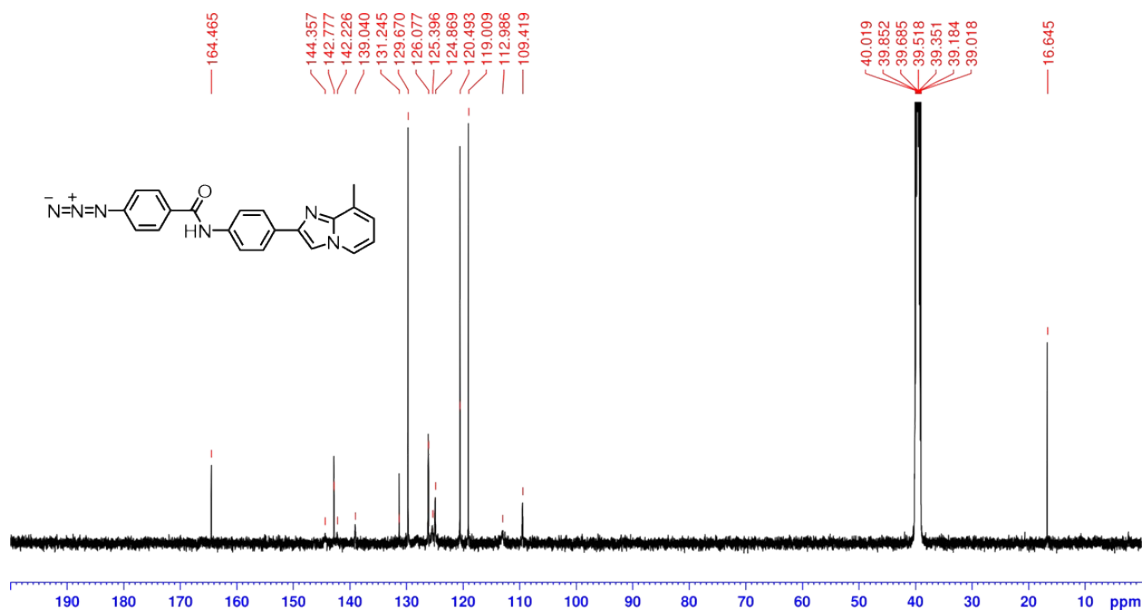

$^1\text{H}$  NMR (500 MHz,  $\text{DMSO}-d_6$ ) of **S29**

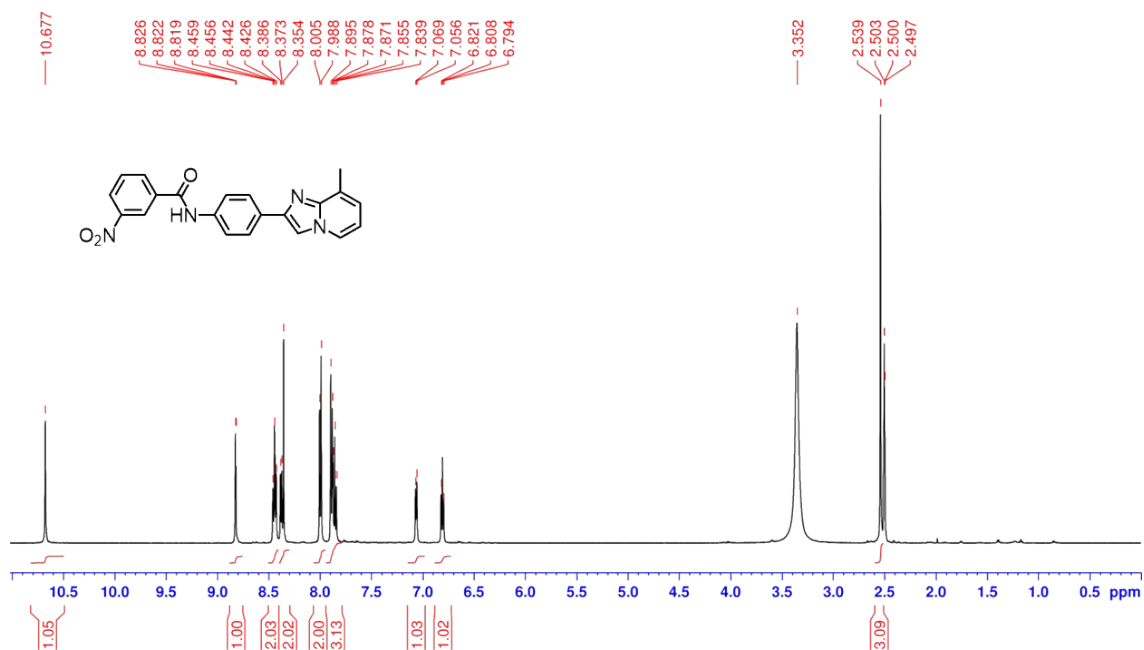

$^{13}\text{C}$  NMR (125 MHz,  $\text{DMSO}-d_6$ ) of **S29**

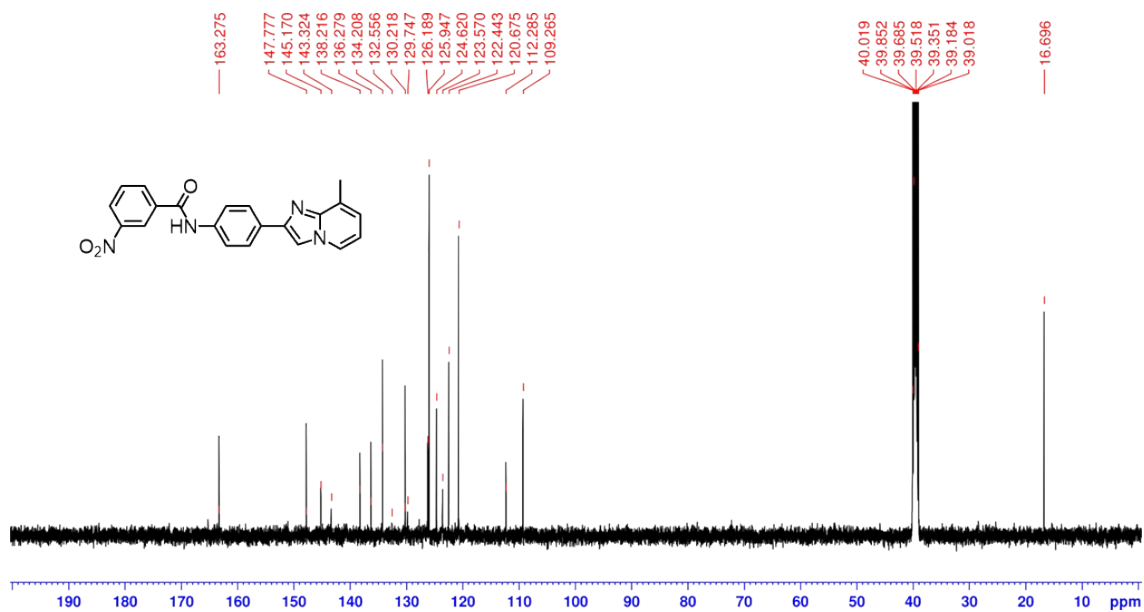

$^1\text{H}$  NMR (500 MHz,  $\text{DMSO-}d_6$ ) of **S30**

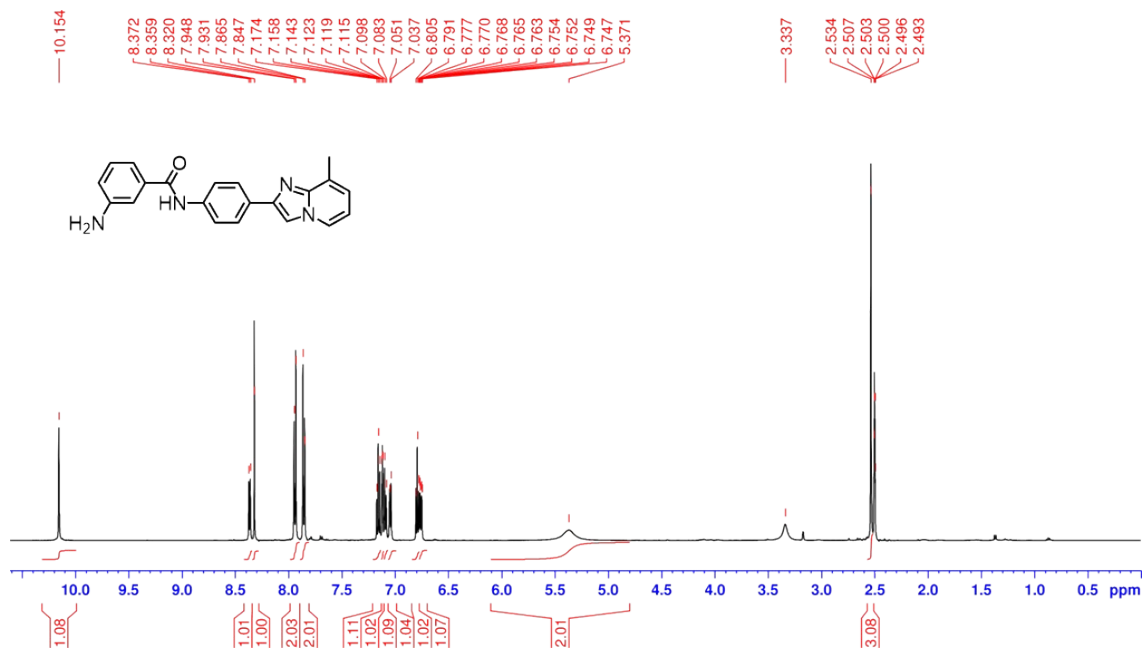

$^{13}\text{C}$  NMR (125 MHz,  $\text{DMSO-}d_6$ ) of **S30**

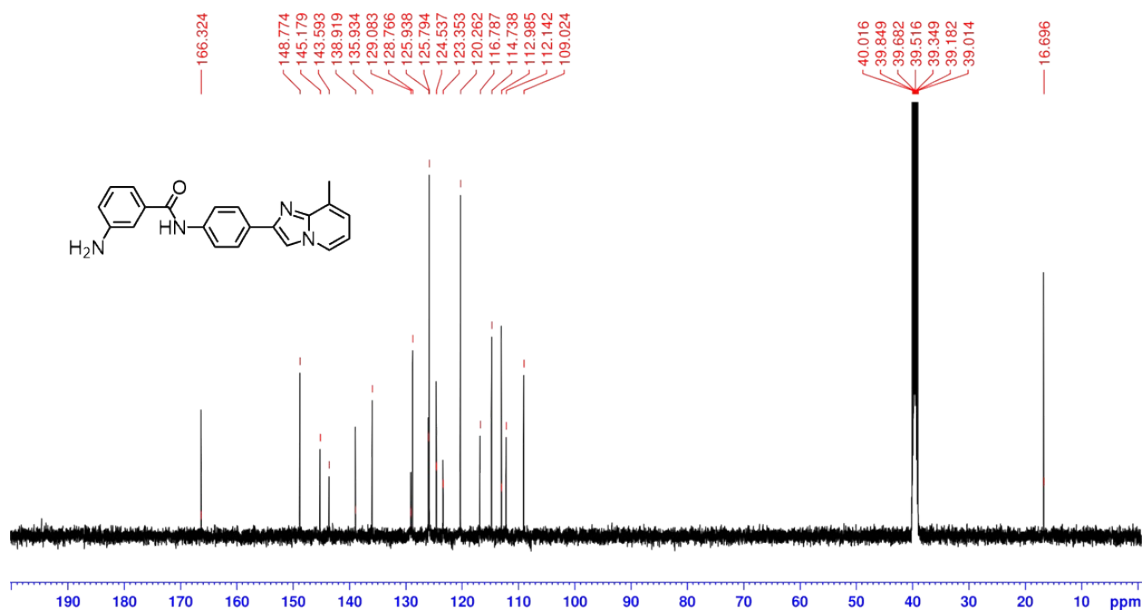

$^1\text{H}$  NMR (500 MHz,  $\text{DMSO-}d_6$ ) of **S31**

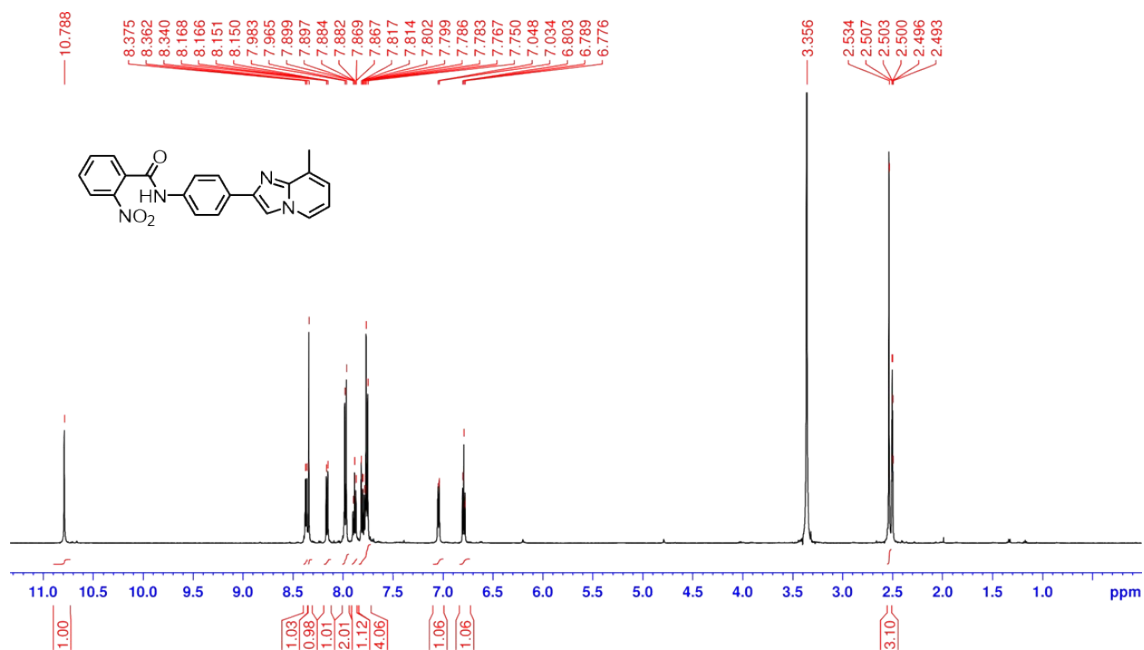

$^{13}\text{C}$  NMR (125 MHz,  $\text{DMSO-}d_6$ ) of **S31**

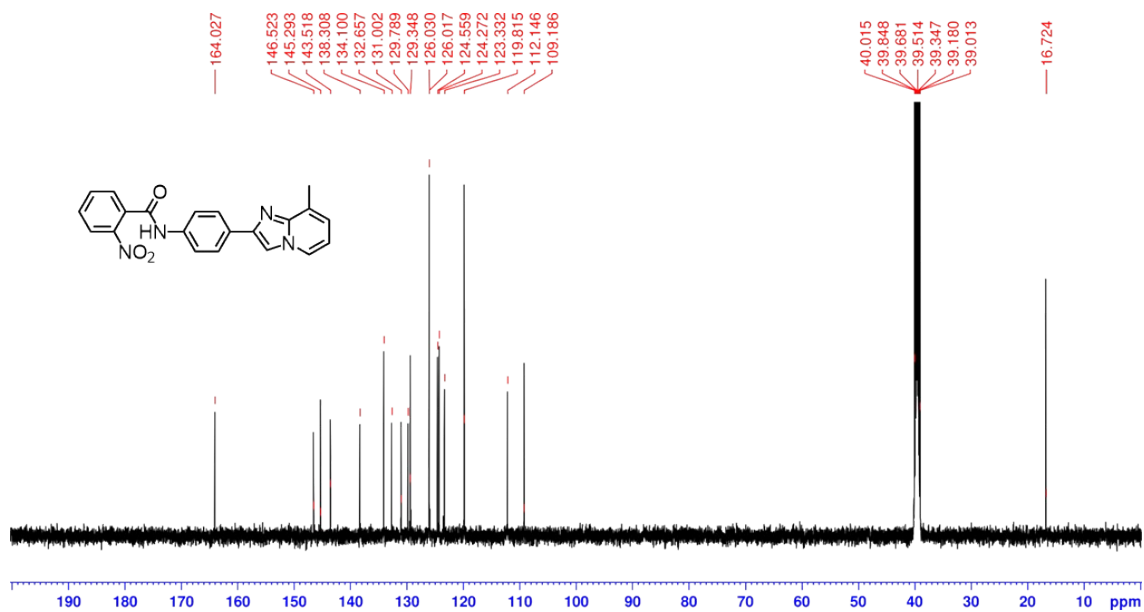

<sup>1</sup>H NMR (500 MHz, DMSO-*d*<sub>6</sub>) of S32

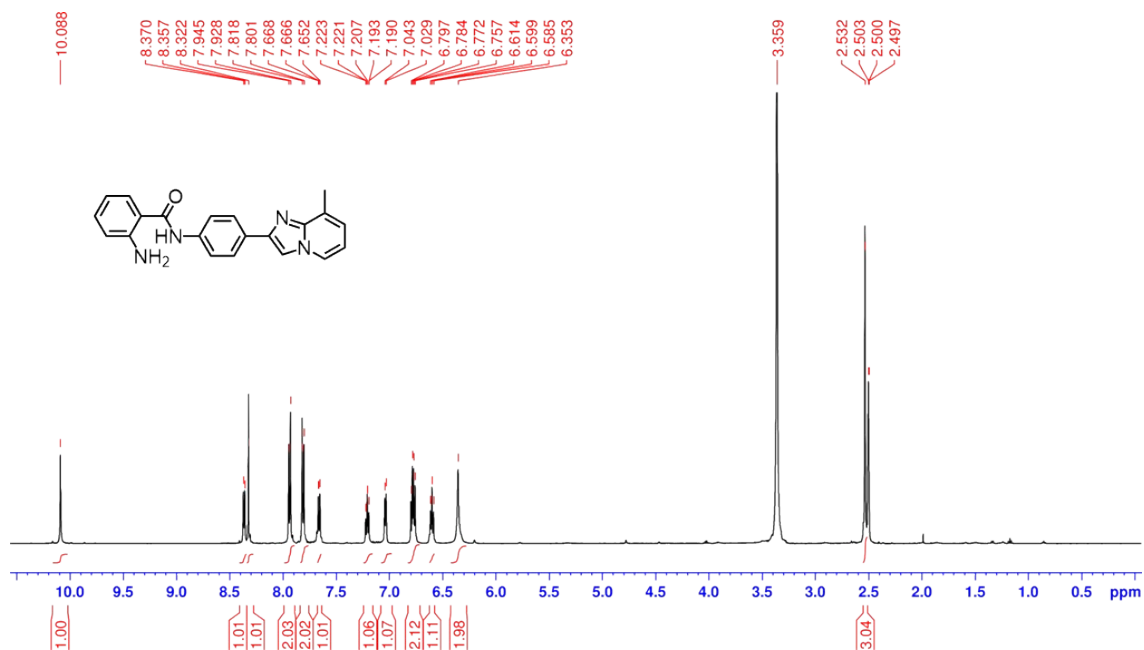

<sup>13</sup>C NMR (125 MHz, DMSO-*d*<sub>6</sub>) of S32

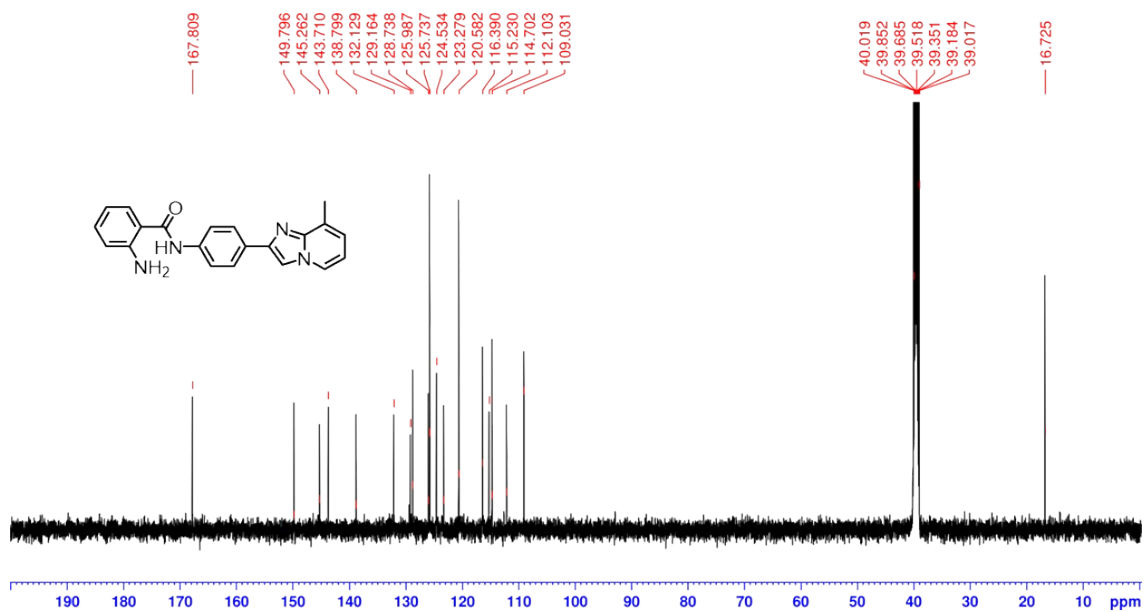

$^1\text{H}$  NMR (500 MHz,  $\text{DMSO}-d_6$ ) of **S33**

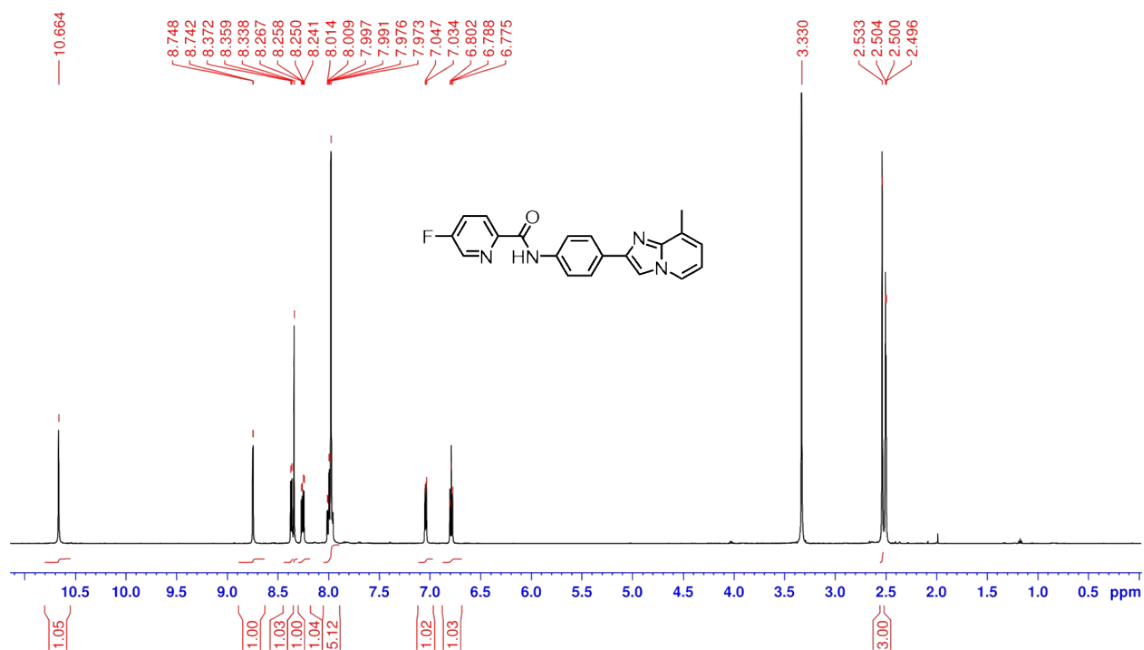

$^{13}\text{C}$  NMR (125 MHz,  $\text{DMSO}-d_6$ ) of **S33**

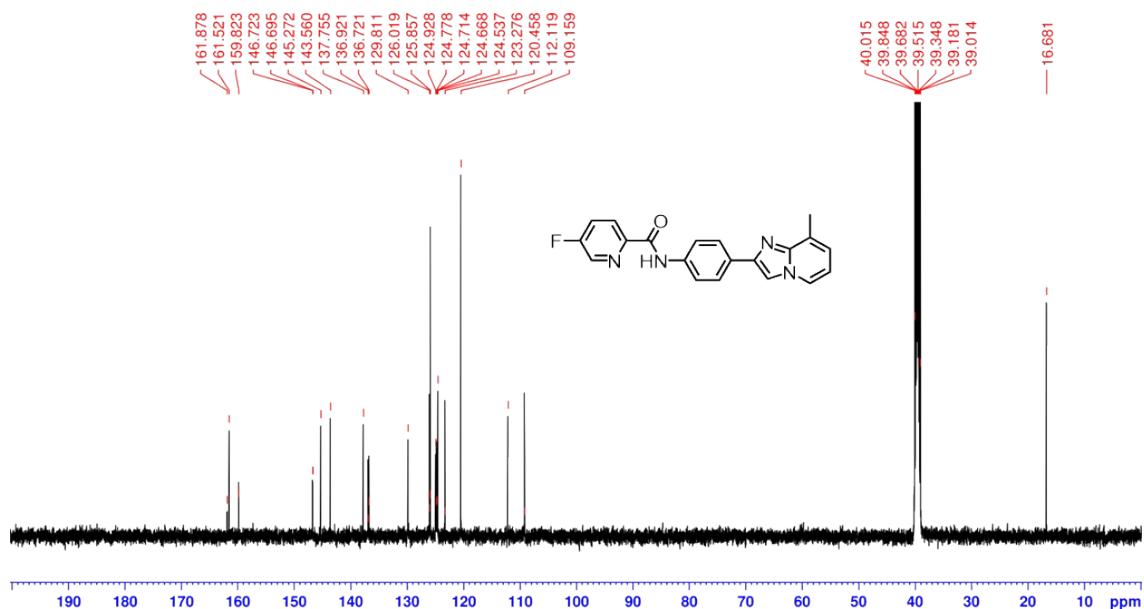

<sup>1</sup>H NMR (500 MHz, DMSO-*d*<sub>6</sub>) of S34

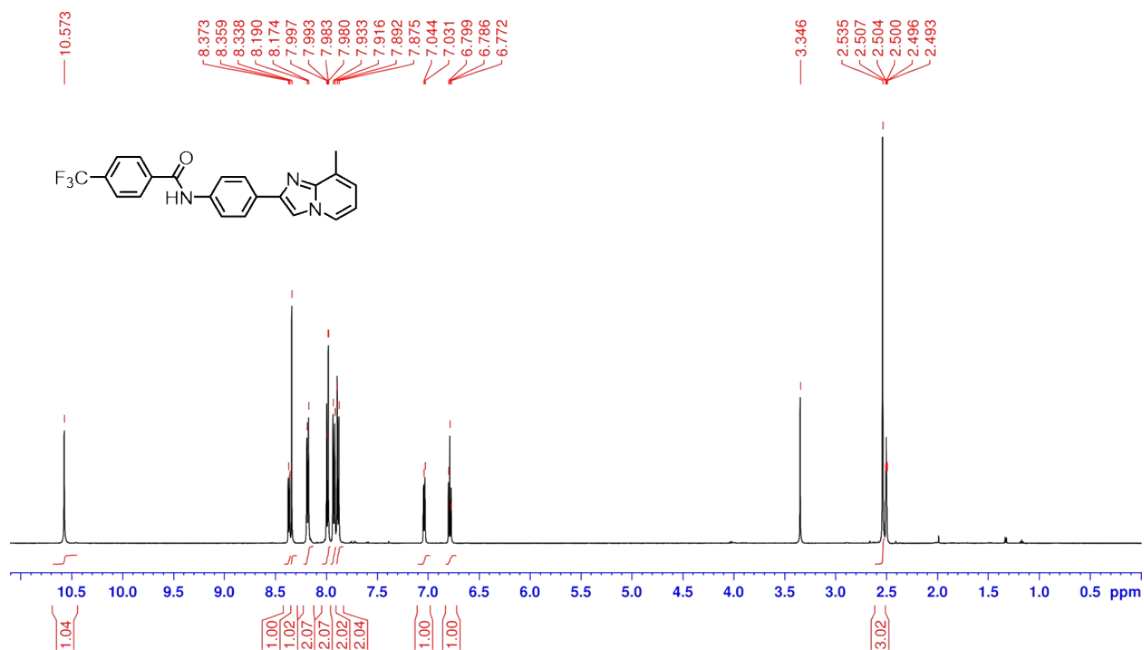

<sup>13</sup>C NMR (125 MHz, DMSO-*d*<sub>6</sub>) of S34

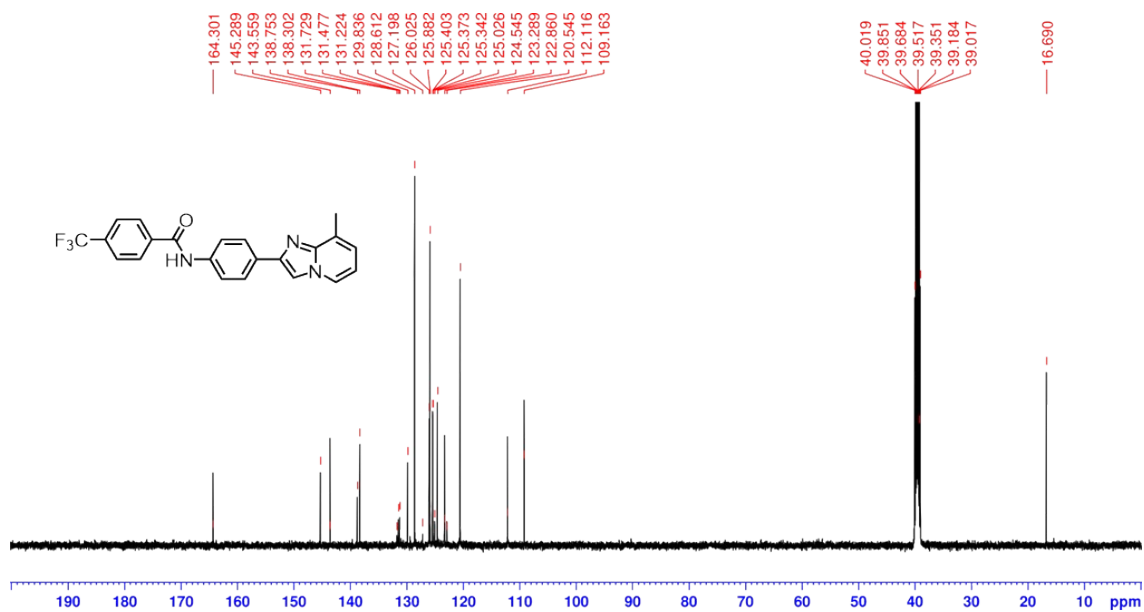

<sup>1</sup>H NMR (500 MHz, DMSO-*d*<sub>6</sub>) of **S35**

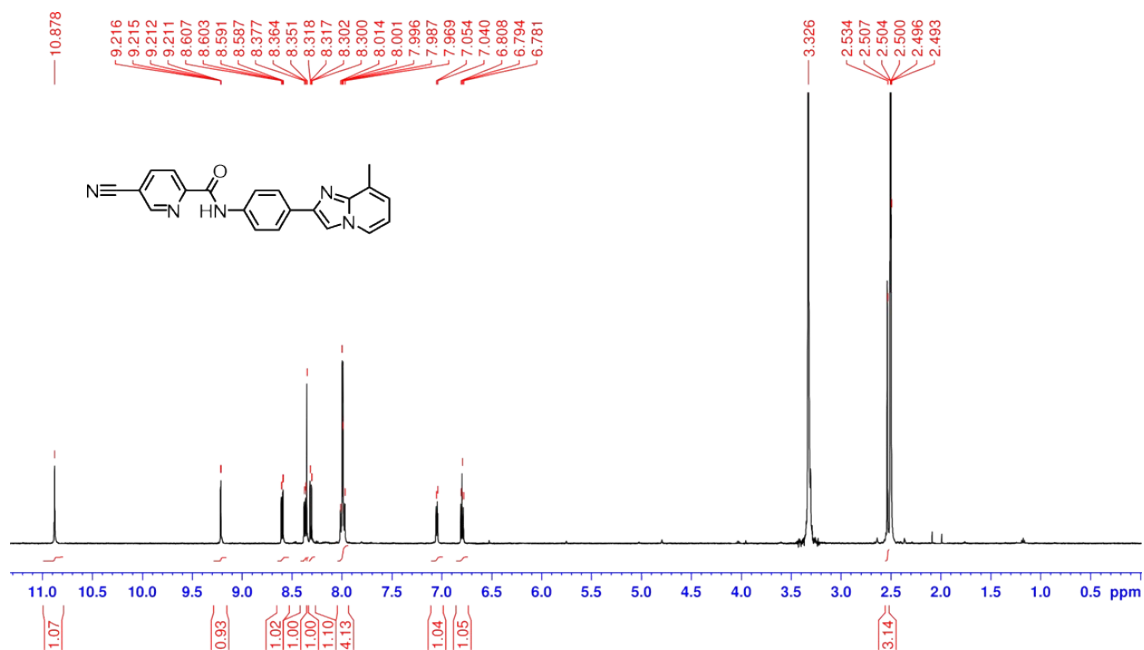

<sup>13</sup>C NMR (125 MHz, DMSO-*d*<sub>6</sub>) of **S35**

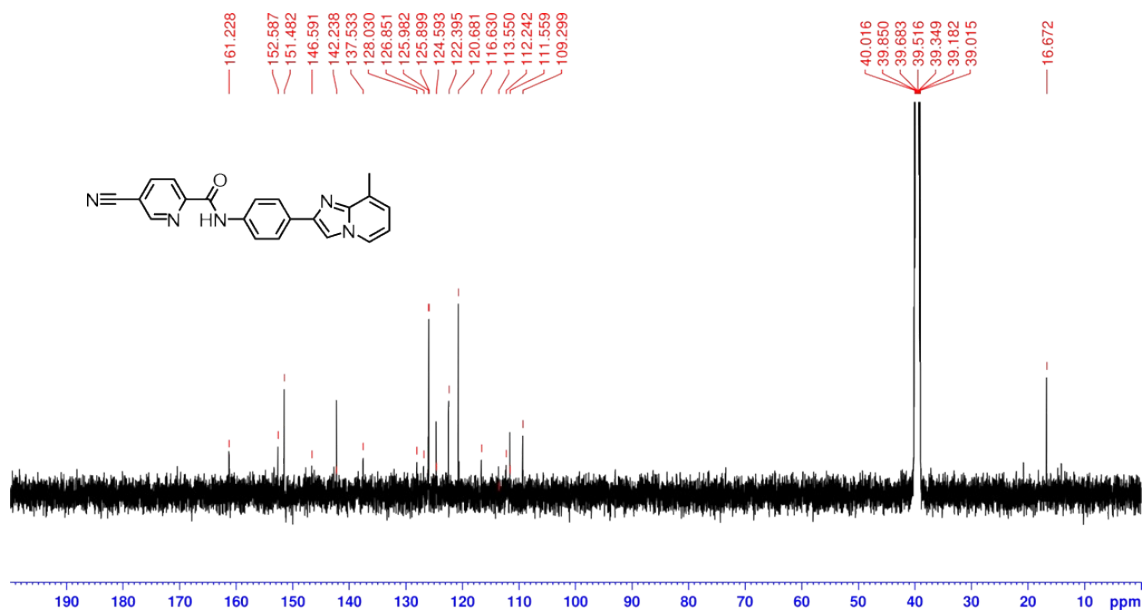



$^1\text{H}$  NMR (500 MHz,  $\text{DMSO}-d_6$ ) of **S36**

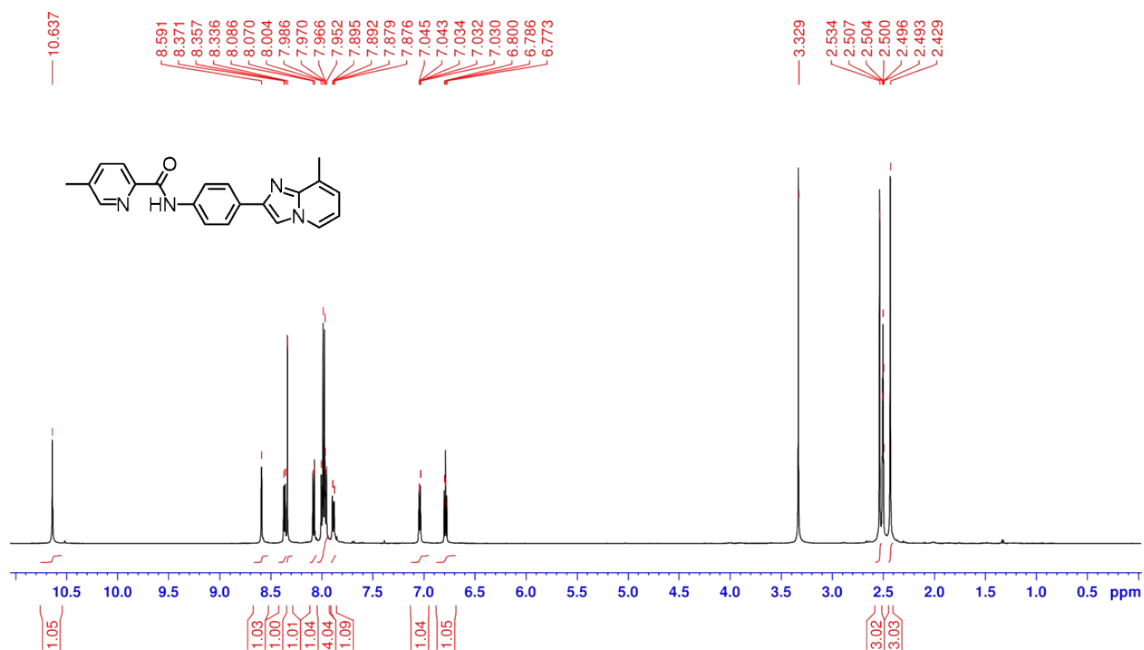

$^{13}\text{C}$  NMR (125 MHz,  $\text{DMSO}-d_6$ ) of **S36**

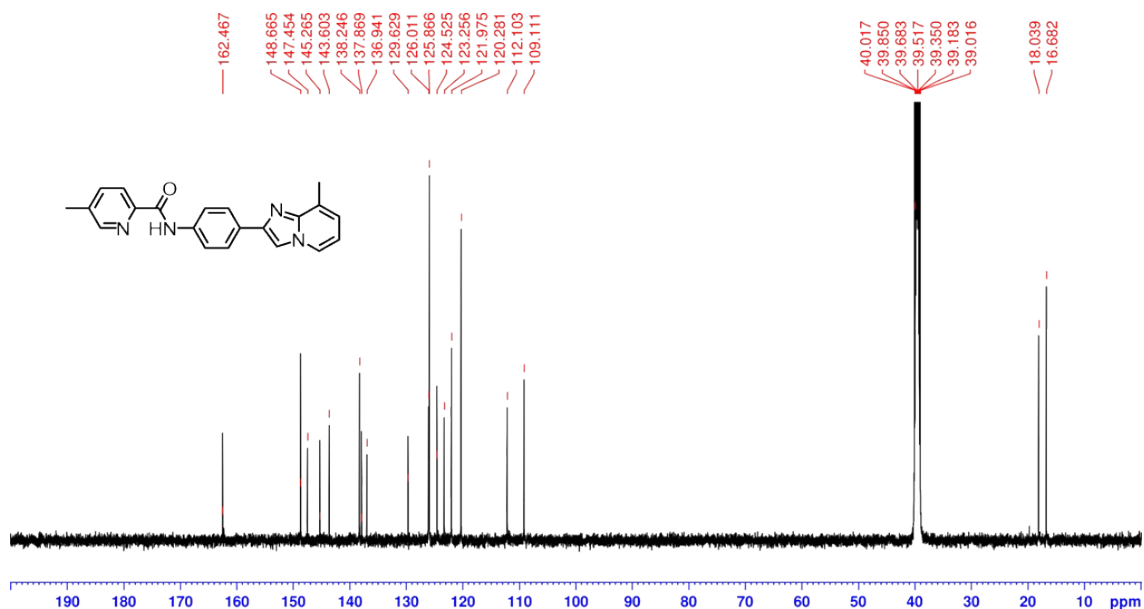

$^1\text{H}$  NMR (500 MHz,  $\text{DMSO}-d_6$ ) of **S37**

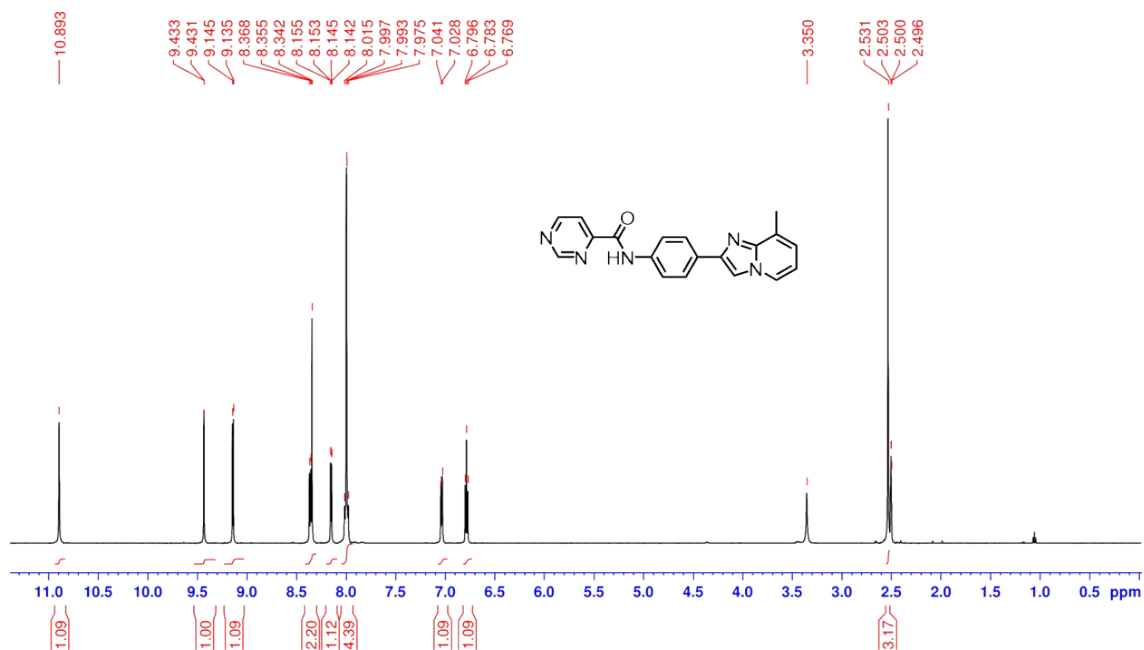

$^{13}\text{C}$  NMR (125 MHz,  $\text{DMSO}-d_6$ ) of **S37**

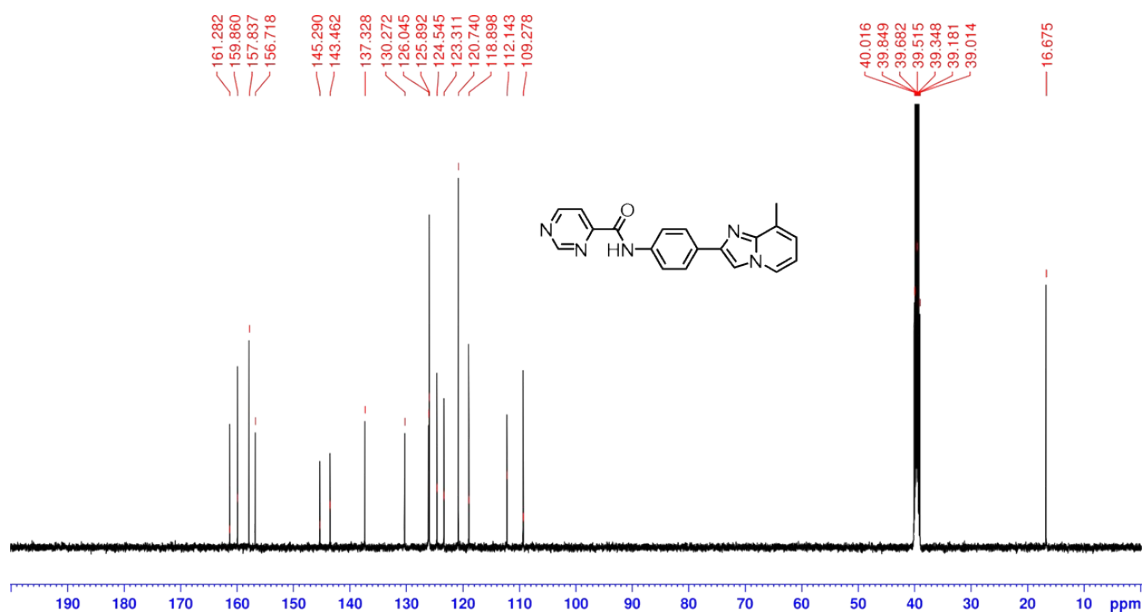

Supplement: d3cc03069e1.pdf [file d3cc03069e1.pdf]
